# Supplementary material for: How Much Can Product Reformulation Improve Diet Quality in Households with Children and Adolescents?
Source: MDPI journal article supplement (doi:10.3390/nu11030618), 2019-03-14
Supplement: s1 [file s1]

## Products

- 1 [Cereal Bars](#)
- 2 [Cookies](#)
- 3 [Crackers](#)
- 4 [Frankfurters](#)
- 5 [Fruit Drinks](#)
- 6 [Ice Cream](#)
- 7 [Lunch Combinations](#)
- 8 [Macaroni & Cheese \(RTE\)](#)
- 9 [Macaroni & Cheese \(Mixes\)](#)
- 10 [Nut Butters](#)
- 11 [Pizza](#)
- 12 [Potato Chips](#)
- 13 [RTE Cereal](#)
- 14 [Soft Drinks](#)
- 15 [Tortilla Chips](#)
- 16 [Yeast Breads](#)
- 17 [Yogurt](#)

## Types and Frequencies of Reformulation: Cereal Bars

Calculations using InfoScan Data for UPCs with positive sales

| Average per-serving nutrient values* | 2012-2014 |        |        |          |         | 2012-2015 |        |        |          |         |
|--------------------------------------|-----------|--------|--------|----------|---------|-----------|--------|--------|----------|---------|
|                                      | 2012      | 2014   | Change | % Change | p-value | 2012      | 2015   | Change | % Change | p-value |
| <b>All UPCs</b>                      |           |        |        |          |         |           |        |        |          |         |
| <b>Calories</b>                      |           |        |        |          |         |           |        |        |          |         |
| Average per-serving                  | 142.56    | 142.79 | 0.23   | 0.16%    | 0.0757  | 143.18    | 143.35 | 0.17   | 0.12%    | 0.2518  |
| Standard deviation                   | 18.73     | 18.57  |        |          |         | 18.78     | 18.68  |        |          |         |
| <b>Saturated fat (grams)</b>         |           |        |        |          |         |           |        |        |          |         |
| Average per-serving                  | 2.05      | 1.84   | -0.22  | -10.51%  | 0.0000  | 2.07      | 1.84   | -0.22  | -10.76%  | 0.0000  |
| Standard deviation                   | 1.28      | 1.27   |        |          |         | 1.29      | 1.28   |        |          |         |
| <b>Sugar (grams)**</b>               |           |        |        |          |         |           |        |        |          |         |
| Average per-serving                  | 9.50      | 9.52   | 0.02   | 0.18%    | 0.3193  | 9.58      |        |        |          |         |
| Standard deviation                   | 3.76      | 3.77   |        |          |         | 3.76      |        |        |          |         |
| <b>Sodium (milligrams)</b>           |           |        |        |          |         |           |        |        |          |         |
| Average per-serving                  | 101.27    | 101.65 | 0.39   | 0.38%    | 0.0021  | 101.49    | 101.94 | 0.44   | 0.44%    | 0.0027  |
| Standard deviation                   | 47.08     | 47.28  |        |          |         | 47.55     | 47.82  |        |          |         |
| <b>Dietary fiber (grams)</b>         |           |        |        |          |         |           |        |        |          |         |
| Average per-serving                  | 2.51      | 2.51   | 0.00   | -0.10%   | 0.4975  | 2.48      | 2.47   | -0.01  | -0.42%   | 0.0708  |
| Standard deviation                   | 1.94      | 1.94   |        |          |         | 1.95      | 1.93   |        |          |         |
| <b>No. of UPCs</b>                   | 1,880     |        |        |          |         | 1,635     |        |        |          |         |
| <b>Branded UPCs</b>                  |           |        |        |          |         |           |        |        |          |         |
| <b>Calories</b>                      |           |        |        |          |         |           |        |        |          |         |
| Average per-serving                  | 142.27    | 142.57 | 0.30   | 0.21%    | 0.0484  | 142.99    | 143.25 | 0.25   | 0.18%    | 0.1587  |
| Standard deviation                   | 18.97     | 18.76  |        |          |         | 19.09     | 18.95  |        |          |         |
| <b>Saturated fat (grams)</b>         |           |        |        |          |         |           |        |        |          |         |
| Average per-serving                  | 2.14      | 1.95   | -0.19  | -8.91%   | 0.0000  | 2.15      | 1.96   | -0.20  | -9.09%   | 0.0000  |
| Standard deviation                   | 1.33      | 1.31   |        |          |         | 1.34      | 1.31   |        |          |         |
| <b>Sugar (grams)**</b>               |           |        |        |          |         |           |        |        |          |         |
| Average per-serving                  | 9.29      | 9.31   | 0.03   | 0.29%    | 0.1752  | 9.37      |        |        |          |         |
| Standard deviation                   | 3.99      | 4.01   |        |          |         | 4.00      |        |        |          |         |
| <b>Sodium (milligrams)</b>           |           |        |        |          |         |           |        |        |          |         |
| Average per-serving                  | 102.21    | 102.55 | 0.34   | 0.33%    | 0.0148  | 102.74    | 103.12 | 0.38   | 0.37%    | 0.0201  |
| Standard deviation                   | 49.60     | 49.82  |        |          |         | 50.21     | 50.50  |        |          |         |
| <b>Dietary fiber (grams)</b>         |           |        |        |          |         |           |        |        |          |         |
| Average per-serving                  | 2.53      | 2.53   | 0.00   | -0.12%   | 0.4975  | 2.51      | 2.50   | -0.01  | -0.50%   | 0.0708  |
| Standard deviation                   | 1.93      | 1.92   |        |          |         | 1.96      | 1.93   |        |          |         |
| <b>No. of UPCs</b>                   | 1,576     |        |        |          |         | 1,370     |        |        |          |         |
| <b>Private Label UPCs</b>            |           |        |        |          |         |           |        |        |          |         |
| <b>Calories</b>                      |           |        |        |          |         |           |        |        |          |         |
| Average per-serving                  | 144.09    | 143.94 | -0.15  | -0.10%   | 0.0956  | 144.15    | 143.91 | -0.24  | -0.16%   | 0.0346  |
| Standard deviation                   | 17.41     | 17.56  |        |          |         | 17.07     | 17.25  |        |          |         |
| <b>Saturated fat (grams)</b>         |           |        |        |          |         |           |        |        |          |         |
| Average per-serving                  | 1.63      | 1.28   | -0.35  | -21.35%  | 0.0000  | 1.60      | 1.25   | -0.36  | -22.35%  | 0.0000  |
| Standard deviation                   | 0.90      | 0.87   |        |          |         | 0.92      | 0.89   |        |          |         |
| <b>Sugar (grams)**</b>               |           |        |        |          |         |           |        |        |          |         |
| Average per-serving                  | 10.61     | 10.58  | -0.03  | -0.31%   | 0.2759  | 10.67     |        |        |          |         |
| Standard deviation                   | 1.78      | 1.85   |        |          |         | 1.78      |        |        |          |         |
| <b>Sodium (milligrams)</b>           |           |        |        |          |         |           |        |        |          |         |
| Average per-serving                  | 96.35     | 96.99  | 0.64   | 0.67%    | 0.0338  | 95.02     | 95.80  | 0.78   | 0.82%    | 0.0286  |
| Standard deviation                   | 30.40     | 30.60  |        |          |         | 29.51     | 29.71  |        |          |         |
| <b>Dietary fiber (grams)</b>         |           |        |        |          |         |           |        |        |          |         |
| Average per-serving                  | 2.41      | 2.41   | 0.00   | 0.00%    | 0.4975  | 2.30      | 2.30   | 0.00   | 0.00%    | 0.0708  |
| Standard deviation                   | 2.03      | 2.03   |        |          |         | 1.91      | 1.91   |        |          |         |
| <b>No. of UPCs</b>                   | 304       |        |        |          |         | 265       |        |        |          |         |

\*Serving = 35 grams

\*\*Sugar data is unavailable for 2015

## Types and Frequencies of Reformulation: Cookies and Brownies

Calculations using InfoScan Data for UPCs with positive sales

| Average per-serving nutrient values* | 2012-2014 |        |        |          |         | 2012-2015 |        |        |          |         |
|--------------------------------------|-----------|--------|--------|----------|---------|-----------|--------|--------|----------|---------|
|                                      | 2012      | 2014   | Change | % Change | p-value | 2012      | 2015   | Change | % Change | p-value |
| <b>All UPCs</b>                      |           |        |        |          |         |           |        |        |          |         |
| <b>Calories</b>                      |           |        |        |          |         |           |        |        |          |         |
| Average per-serving                  | 136.20    | 136.24 | 0.04   | 0.03%    | 0.2491  | 136.17    | 136.25 | 0.07   | 0.05%    | 0.1758  |
| Standard deviation                   | 18.91     | 18.80  |        |          |         | 18.89     | 18.86  |        |          |         |
| <b>Saturated fat (grams)</b>         |           |        |        |          |         |           |        |        |          |         |
| Average per-serving                  | 2.52      | 2.34   | -0.18  | -7.00%   | 0.0000  | 2.52      | 2.35   | -0.17  | -6.90%   | 0.0000  |
| Standard deviation                   | 1.55      | 1.54   |        |          |         | 1.57      | 1.55   |        |          |         |
| <b>Sugar (grams)**</b>               |           |        |        |          |         |           |        |        |          |         |
| Average per-serving                  | 9.84      | 9.84   | 0.00   | -0.02%   | 0.4224  | 9.82      |        |        |          |         |
| Standard deviation                   | 3.29      | 3.29   |        |          |         | 3.29      |        |        |          |         |
| <b>Sodium (milligrams)</b>           |           |        |        |          |         |           |        |        |          |         |
| Average per-serving                  | 92.13     | 92.12  | -0.02  | -0.02%   | 0.6276  | 92.31     | 92.29  | -0.02  | -0.02%   | 0.7289  |
| Standard deviation                   | 38.72     | 38.62  |        |          |         | 38.62     | 38.49  |        |          |         |
| <b>Dietary fiber (grams)</b>         |           |        |        |          |         |           |        |        |          |         |
| Average per-serving                  | 0.71      | 0.71   | 0.00   | -0.30%   | 0.0792  | 0.71      | 0.71   | 0.00   | -0.28%   | 0.1932  |
| Standard deviation                   | 0.78      | 0.77   |        |          |         | 0.77      | 0.77   |        |          |         |
| <b>No. of UPCs</b>                   | 3,809     |        |        |          |         | 3,360     |        |        |          |         |
| <b>Branded UPCs</b>                  |           |        |        |          |         |           |        |        |          |         |
| <b>Calories</b>                      |           |        |        |          |         |           |        |        |          |         |
| Average per-serving                  | 136.19    | 136.27 | 0.08   | 0.06%    | 0.0705  | 136.23    | 136.34 | 0.10   | 0.08%    | 0.1497  |
| Standard deviation                   | 19.62     | 19.48  |        |          |         | 19.45     | 19.42  |        |          |         |
| <b>Saturated fat (grams)</b>         |           |        |        |          |         |           |        |        |          |         |
| Average per-serving                  | 2.55      | 2.38   | -0.17  | -6.82%   | 0.0000  | 2.55      | 2.38   | -0.17  | -6.78%   | 0.0000  |
| Standard deviation                   | 1.61      | 1.58   |        |          |         | 1.63      | 1.60   |        |          |         |
| <b>Sugar (grams)**</b>               |           |        |        |          |         |           |        |        |          |         |
| Average per-serving                  | 9.68      | 9.68   | 0.00   | -0.01%   | 0.8106  | 9.67      |        |        |          |         |
| Standard deviation                   | 3.44      | 3.45   |        |          |         | 3.45      |        |        |          |         |
| <b>Sodium (milligrams)</b>           |           |        |        |          |         |           |        |        |          |         |
| Average per-serving                  | 88.39     | 88.36  | -0.03  | -0.04%   | 0.5231  | 88.46     | 88.38  | -0.08  | -0.09%   | 0.2517  |
| Standard deviation                   | 38.95     | 38.80  |        |          |         | 39.17     | 38.99  |        |          |         |
| <b>Dietary fiber (grams)</b>         |           |        |        |          |         |           |        |        |          |         |
| Average per-serving                  | 0.77      | 0.77   | 0.00   | -0.29%   | 0.1695  | 0.76      | 0.76   | 0.00   | -0.08%   | 0.7409  |
| Standard deviation                   | 0.84      | 0.83   |        |          |         | 0.83      | 0.83   |        |          |         |
| <b>No. of UPCs</b>                   | 2,708     |        |        |          |         | 2,393     |        |        |          |         |
| <b>Private Label UPCs</b>            |           |        |        |          |         |           |        |        |          |         |
| <b>Calories</b>                      |           |        |        |          |         |           |        |        |          |         |
| Average per-serving                  | 136.20    | 136.14 | -0.06  | -0.04%   | 0.0811  | 136.03    | 136.03 | 0.01   | 0.00%    | 0.9029  |
| Standard deviation                   | 17.03     | 17.00  |        |          |         | 17.42     | 17.41  |        |          |         |
| <b>Saturated fat (grams)</b>         |           |        |        |          |         |           |        |        |          |         |
| Average per-serving                  | 2.44      | 2.26   | -0.18  | -7.47%   | 0.0000  | 2.44      | 2.26   | -0.18  | -7.33%   | 0.0000  |
| Standard deviation                   | 1.42      | 1.42   |        |          |         | 1.42      | 1.42   |        |          |         |
| <b>Sugar (grams)**</b>               |           |        |        |          |         |           |        |        |          |         |
| Average per-serving                  | 10.26     | 10.25  | -0.01  | -0.06%   | 0.0461  | 10.21     |        |        |          |         |
| Standard deviation                   | 2.81      | 2.81   |        |          |         | 2.82      |        |        |          |         |
| <b>Sodium (milligrams)</b>           |           |        |        |          |         |           |        |        |          |         |
| Average per-serving                  | 101.43    | 101.45 | 0.02   | 0.02%    | 0.7214  | 101.82    | 101.92 | 0.10   | 0.10%    | 0.3217  |
| Standard deviation                   | 36.50     | 36.48  |        |          |         | 35.51     | 35.43  |        |          |         |
| <b>Dietary fiber (grams)</b>         |           |        |        |          |         |           |        |        |          |         |
| Average per-serving                  | 0.57      | 0.57   | 0.00   | -0.35%   | 0.1839  | 0.57      | 0.57   | -0.01  | -0.94%   | 0.0299  |
| Standard deviation                   | 0.58      | 0.58   |        |          |         | 0.58      | 0.58   |        |          |         |
| <b>No. of UPCs</b>                   | 1,099     |        |        |          |         | 965       |        |        |          |         |

\*Serving = 30 grams

\*\*Sugar data is unavailable for 2015

## Types and Frequencies of Reformulation: Crackers

Calculations using InfoScan Data for UPCs with positive sales

| Average per-serving nutrient values* | 2012-2014 |        |        |          |         | 2012-2015 |        |        |          |         |
|--------------------------------------|-----------|--------|--------|----------|---------|-----------|--------|--------|----------|---------|
|                                      | 2012      | 2014   | Change | % Change | p-value | 2012      | 2015   | Change | % Change | p-value |
| <b>All UPCs</b>                      |           |        |        |          |         |           |        |        |          |         |
| <b>Calories</b>                      |           |        |        |          |         |           |        |        |          |         |
| Average per-serving                  | 129.94    | 129.95 | 0.01   | 0.01%    | 0.8548  | 129.55    | 129.50 | -0.05  | -0.04%   | 0.4569  |
| Standard deviation                   | 17.98     | 17.82  |        |          |         | 17.93     | 17.71  |        |          |         |
| <b>Saturated fat (grams)</b>         |           |        |        |          |         |           |        |        |          |         |
| Average per-serving                  | 1.06      | 0.90   | -0.16  | -15.21%  | 0.0000  | 1.04      | 0.89   | -0.16  | -15.12%  | 0.0000  |
| Standard deviation                   | 1.19      | 1.09   |        |          |         | 1.22      | 1.12   |        |          |         |
| <b>Sugar (grams)**</b>               |           |        |        |          |         |           |        |        |          |         |
| Average per-serving                  | 2.12      | 2.12   | 0.00   | -0.09%   | 0.3542  | 2.10      |        |        |          |         |
| Standard deviation                   | 2.59      | 2.59   |        |          |         | 2.60      |        |        |          |         |
| <b>Sodium (milligrams)</b>           |           |        |        |          |         |           |        |        |          |         |
| Average per-serving                  | 204.79    | 204.81 | 0.02   | 0.01%    | 0.7911  | 202.47    | 202.48 | 0.01   | 0.01%    | 0.9198  |
| Standard deviation                   | 100.72    | 100.63 |        |          |         | 101.24    | 100.98 |        |          |         |
| <b>Dietary fiber (grams)</b>         |           |        |        |          |         |           |        |        |          |         |
| Average per-serving                  | 1.32      | 1.32   | -0.01  | -0.49%   | 0.0108  | 1.32      | 1.32   | -0.01  | -0.57%   | 0.0093  |
| Standard deviation                   | 1.20      | 1.19   |        |          |         | 1.18      | 1.17   |        |          |         |
| <b>No. of UPCs</b>                   | 2,052     |        |        |          |         | 1,842     |        |        |          |         |
| <b>Branded UPCs</b>                  |           |        |        |          |         |           |        |        |          |         |
| <b>Calories</b>                      |           |        |        |          |         |           |        |        |          |         |
| Average per-serving                  | 129.55    | 129.57 | 0.01   | 0.01%    | 0.8548  | 129.34    | 129.28 | -0.06  | -0.05%   | 0.4570  |
| Standard deviation                   | 18.64     | 18.44  |        |          |         | 18.49     | 18.20  |        |          |         |
| <b>Saturated fat (grams)</b>         |           |        |        |          |         |           |        |        |          |         |
| Average per-serving                  | 1.10      | 0.95   | -0.15  | -14.00%  | 0.0000  | 1.10      | 0.94   | -0.15  | -14.04%  | 0.0000  |
| Standard deviation                   | 1.26      | 1.16   |        |          |         | 1.28      | 1.18   |        |          |         |
| <b>Sugar (grams)**</b>               |           |        |        |          |         |           |        |        |          |         |
| Average per-serving                  | 1.91      | 1.91   | 0.00   | -0.13%   | 0.3542  | 1.87      |        |        |          |         |
| Standard deviation                   | 2.37      | 2.37   |        |          |         | 2.36      |        |        |          |         |
| <b>Sodium (milligrams)</b>           |           |        |        |          |         |           |        |        |          |         |
| Average per-serving                  | 202.93    | 202.96 | 0.03   | 0.01%    | 0.7911  | 201.48    | 201.51 | 0.02   | 0.01%    | 0.8869  |
| Standard deviation                   | 99.13     | 99.02  |        |          |         | 99.63     | 99.30  |        |          |         |
| <b>Dietary fiber (grams)</b>         |           |        |        |          |         |           |        |        |          |         |
| Average per-serving                  | 1.42      | 1.41   | -0.01  | -0.57%   | 0.0143  | 1.40      | 1.39   | -0.01  | -0.61%   | 0.0184  |
| Standard deviation                   | 1.24      | 1.24   |        |          |         | 1.22      | 1.21   |        |          |         |
| <b>No. of UPCs</b>                   | 1,550     |        |        |          |         | 1,418     |        |        |          |         |
| <b>Private Label UPCs</b>            |           |        |        |          |         |           |        |        |          |         |
| <b>Calories</b>                      |           |        |        |          |         |           |        |        |          |         |
| Average per-serving                  | 131.27    | 131.27 | 0.00   | 0.00%    |         | 130.37    | 130.37 | 0.00   | 0.00%    |         |
| Standard deviation                   | 15.53     | 15.53  |        |          |         | 15.70     | 15.70  |        |          |         |
| <b>Saturated fat (grams)</b>         |           |        |        |          |         |           |        |        |          |         |
| Average per-serving                  | 0.94      | 0.76   | -0.18  | -19.60%  | 0.0000  | 0.87      | 0.70   | -0.17  | -19.67%  | 0.0000  |
| Standard deviation                   | 0.94      | 0.81   |        |          |         | 0.96      | 0.83   |        |          |         |
| <b>Sugar (grams)**</b>               |           |        |        |          |         |           |        |        |          |         |
| Average per-serving                  | 2.78      | 2.78   | 0.00   | 0.00%    |         | 2.89      |        |        |          |         |
| Standard deviation                   | 3.09      | 3.09   |        |          |         | 3.16      |        |        |          |         |
| <b>Sodium (milligrams)</b>           |           |        |        |          |         |           |        |        |          |         |
| Average per-serving                  | 210.64    | 210.64 | 0.00   | 0.00%    |         | 205.89    | 205.87 | -0.02  | -0.01%   | 0.3179  |
| Standard deviation                   | 105.42    | 105.42 |        |          |         | 106.60    | 106.58 |        |          |         |
| <b>Dietary fiber (grams)</b>         |           |        |        |          |         |           |        |        |          |         |
| Average per-serving                  | 1.04      | 1.04   | 0.00   | -0.12%   | 0.3178  | 1.06      | 1.06   | 0.00   | -0.36%   | 0.1703  |
| Standard deviation                   | 0.98      | 0.98   |        |          |         | 1.00      | 1.00   |        |          |         |
| <b>No. of UPCs</b>                   | 501       |        |        |          |         | 423       |        |        |          |         |

\*Serving = 30 grams

\*\*Sugar data is unavailable for 2015

## Types and Frequencies of Reformulation: [Frankfurters](#)

Calculations using InfoScan Data for UPCs with positive sales

| Average per-serving nutrient values* | 2012-2014 |        |        |          |         | 2012-2015 |        |        |          |         |
|--------------------------------------|-----------|--------|--------|----------|---------|-----------|--------|--------|----------|---------|
|                                      | 2012      | 2014   | Change | % Change | p-value | 2012      | 2015   | Change | % Change | p-value |
| <b>All UPCs</b>                      |           |        |        |          |         |           |        |        |          |         |
| <b>Calories</b>                      |           |        |        |          |         |           |        |        |          |         |
| Average per-serving                  | 157.80    | 157.79 | -0.01  | -0.01%   | 0.3177  | 157.49    | 157.23 | -0.26  | -0.17%   | 0.2955  |
| Standard deviation                   | 27.06     | 27.05  |        |          |         | 27.11     | 26.48  |        |          |         |
| <b>Saturated fat (grams)</b>         |           |        |        |          |         |           |        |        |          |         |
| Average per-serving                  | 4.99      | 4.84   | -0.16  | -3.11%   | 0.0000  | 4.98      | 4.81   | -0.16  | -3.30%   | 0.0000  |
| Standard deviation                   | 1.36      | 1.39   |        |          |         | 1.35      | 1.37   |        |          |         |
| <b>Sugar (grams)**</b>               |           |        |        |          |         |           |        |        |          |         |
| Average per-serving                  | 1.11      | 1.11   | 0.00   | -0.16%   | 0.3177  | 1.05      |        |        |          |         |
| Standard deviation                   | 1.06      | 1.05   |        |          |         | 1.03      |        |        |          |         |
| <b>Sodium (milligrams)</b>           |           |        |        |          |         |           |        |        |          |         |
| Average per-serving                  | 539.03    | 539.03 | 0.00   | 0.00%    | 0.3177  | 538.69    | 538.69 | 0.00   | 0.00%    | 0.3178  |
| Standard deviation                   | 104.33    | 104.33 |        |          |         | 106.09    | 106.09 |        |          |         |
| <b>Dietary fiber (grams)</b>         |           |        |        |          |         |           |        |        |          |         |
| Average per-serving                  | 0.04      | 0.04   | 0.00   | 0.00%    |         | 0.04      | 0.04   | 0.00   | 0.00%    |         |
| Standard deviation                   | 0.27      | 0.27   |        |          |         | 0.26      | 0.26   |        |          |         |
| <b>No. of UPCs</b>                   | 573       |        |        |          |         | 498       |        |        |          |         |
| <b>Branded UPCs</b>                  |           |        |        |          |         |           |        |        |          |         |
| <b>Calories</b>                      |           |        |        |          |         |           |        |        |          |         |
| Average per-serving                  | 156.54    | 156.53 | -0.01  | -0.01%   | 0.3178  | 156.21    | 155.92 | -0.29  | -0.19%   | 0.2955  |
| Standard deviation                   | 27.94     | 27.93  |        |          |         | 27.94     | 27.23  |        |          |         |
| <b>Saturated fat (grams)</b>         |           |        |        |          |         |           |        |        |          |         |
| Average per-serving                  | 4.93      | 4.78   | -0.15  | -3.05%   | 0.0000  | 4.91      | 4.75   | -0.16  | -3.30%   | 0.0000  |
| Standard deviation                   | 1.40      | 1.42   |        |          |         | 1.38      | 1.40   |        |          |         |
| <b>Sugar (grams)**</b>               |           |        |        |          |         |           |        |        |          |         |
| Average per-serving                  | 1.07      | 1.07   | 0.00   | -0.19%   | 0.3178  | 1.04      |        |        |          |         |
| Standard deviation                   | 1.02      | 1.02   |        |          |         | 1.00      |        |        |          |         |
| <b>Sodium (milligrams)</b>           |           |        |        |          |         |           |        |        |          |         |
| Average per-serving                  | 535.21    | 535.20 | 0.00   | 0.00%    | 0.3178  | 537.74    | 537.74 | 0.00   | 0.00%    | 0.3179  |
| Standard deviation                   | 103.79    | 103.78 |        |          |         | 106.52    | 106.51 |        |          |         |
| <b>Dietary fiber (grams)</b>         |           |        |        |          |         |           |        |        |          |         |
| Average per-serving                  | 0.05      | 0.05   | 0.00   | 0.00%    |         | 0.04      | 0.04   | 0.00   | 0.00%    |         |
| Standard deviation                   | 0.29      | 0.29   |        |          |         | 0.28      | 0.28   |        |          |         |
| <b>No. of UPCs</b>                   | 497       |        |        |          |         | 443       |        |        |          |         |
| <b>Private Label UPCs</b>            |           |        |        |          |         |           |        |        |          |         |
| <b>Calories</b>                      |           |        |        |          |         |           |        |        |          |         |
| Average per-serving                  | 167.18    | 167.18 | 0.00   | 0.00%    |         | 169.54    | 169.54 | 0.00   | 0.00%    |         |
| Standard deviation                   | 17.92     | 17.92  |        |          |         | 14.62     | 14.62  |        |          |         |
| <b>Saturated fat (grams)</b>         |           |        |        |          |         |           |        |        |          |         |
| Average per-serving                  | 5.44      | 5.24   | -0.19  | -3.58%   | 0.0000  | 5.60      | 5.41   | -0.19  | -3.40%   | 0.0002  |
| Standard deviation                   | 1.04      | 1.07   |        |          |         | 0.89      | 0.90   |        |          |         |
| <b>Sugar (grams)**</b>               |           |        |        |          |         |           |        |        |          |         |
| Average per-serving                  | 1.37      | 1.37   | 0.00   | 0.00%    |         | 1.17      |        |        |          |         |
| Standard deviation                   | 1.26      | 1.26   |        |          |         | 1.31      |        |        |          |         |
| <b>Sodium (milligrams)</b>           |           |        |        |          |         |           |        |        |          |         |
| Average per-serving                  | 564.32    | 564.32 | 0.00   | 0.00%    |         | 545.67    | 545.67 | 0.00   | 0.00%    |         |
| Standard deviation                   | 107.25    | 107.25 |        |          |         | 106.12    | 106.12 |        |          |         |
| <b>Dietary fiber (grams)</b>         |           |        |        |          |         |           |        |        |          |         |
| Average per-serving                  | 0.00      | 0.00   | 0.00   |          |         | 0.00      | 0.00   | 0.00   |          |         |
| Standard deviation                   | 0.00      | 0.00   |        |          |         | 0.00      | 0.00   |        |          |         |
| <b>No. of UPCs</b>                   | 73        |        |        |          |         | 52        |        |        |          |         |

\*Serving = 56 grams

\*\*Sugar data is unavailable for 2015

## Types and Frequencies of Reformulation: **Fruit Drinks**

Calculations using InfoScan Data for UPCs with positive sales

| Average per-serving nutrient values* | 2012-2014 |        |        |          |         | 2012-2015 |        |        |          |         |
|--------------------------------------|-----------|--------|--------|----------|---------|-----------|--------|--------|----------|---------|
|                                      | 2012      | 2014   | Change | % Change | p-value | 2012      | 2015   | Change | % Change | p-value |
| <b>All UPCs</b>                      |           |        |        |          |         |           |        |        |          |         |
| <b>Calories</b>                      |           |        |        |          |         |           |        |        |          |         |
| Average per-serving                  | 98.76     | 98.80  | 0.04   | 0.04%    | 0.0013  | 99.02     | 98.83  | -0.19  | -0.19%   | 0.0576  |
| Standard deviation                   | 40.96     | 40.99  |        |          |         | 40.31     | 40.48  |        |          |         |
| <b>Saturated fat (grams)</b>         |           |        |        |          |         |           |        |        |          |         |
| Average per-serving                  |           |        |        |          |         |           |        |        |          |         |
| Standard deviation                   |           |        |        |          |         |           |        |        |          |         |
| <b>Sugar (grams)**</b>               |           |        |        |          |         |           |        |        |          |         |
| Average per-serving                  | 23.50     | 23.51  | 0.01   | 0.04%    | 0.0012  | 23.57     |        |        |          |         |
| Standard deviation                   | 10.02     | 10.03  |        |          |         | 9.91      |        |        |          |         |
| <b>Sodium (milligrams)</b>           |           |        |        |          |         |           |        |        |          |         |
| Average per-serving                  | 34.37     | 34.38  | 0.01   | 0.04%    | 0.0013  | 34.27     | 34.17  | -0.10  | -0.29%   | 0.0493  |
| Standard deviation                   | 35.06     | 35.08  |        |          |         | 35.06     | 35.07  |        |          |         |
| <b>Dietary fiber (grams)</b>         |           |        |        |          |         |           |        |        |          |         |
| Average per-serving                  |           |        |        |          |         |           |        |        |          |         |
| Standard deviation                   |           |        |        |          |         |           |        |        |          |         |
| <b>No. of UPCs</b>                   | 2,116     |        |        |          |         | 1,903     |        |        |          |         |
| <b>Branded UPCs</b>                  |           |        |        |          |         |           |        |        |          |         |
| <b>Calories</b>                      |           |        |        |          |         |           |        |        |          |         |
| Average per-serving                  | 97.42     | 97.47  | 0.06   | 0.06%    | 0.0016  | 97.92     | 97.67  | -0.25  | -0.26%   | 0.0563  |
| Standard deviation                   | 40.75     | 40.79  |        |          |         | 39.69     | 39.92  |        |          |         |
| <b>Saturated fat (grams)</b>         |           |        |        |          |         |           |        |        |          |         |
| Average per-serving                  |           |        |        |          |         |           |        |        |          |         |
| Standard deviation                   |           |        |        |          |         |           |        |        |          |         |
| <b>Sugar (grams)**</b>               |           |        |        |          |         |           |        |        |          |         |
| Average per-serving                  | 22.86     | 22.87  | 0.01   | 0.05%    | 0.0015  | 23.00     |        |        |          |         |
| Standard deviation                   | 9.85      | 9.86   |        |          |         | 9.66      |        |        |          |         |
| <b>Sodium (milligrams)</b>           |           |        |        |          |         |           |        |        |          |         |
| Average per-serving                  | 32.48     | 32.49  | 0.02   | 0.06%    | 0.0015  | 32.16     | 32.03  | -0.13  | -0.41%   | 0.0487  |
| Standard deviation                   | 37.32     | 37.34  |        |          |         | 37.14     | 37.14  |        |          |         |
| <b>Dietary fiber (grams)</b>         |           |        |        |          |         |           |        |        |          |         |
| Average per-serving                  |           |        |        |          |         |           |        |        |          |         |
| Standard deviation                   |           |        |        |          |         |           |        |        |          |         |
| <b>No. of UPCs</b>                   | 1,590     |        |        |          |         | 1,446     |        |        |          |         |
| <b>Private Label UPCs</b>            |           |        |        |          |         |           |        |        |          |         |
| <b>Calories</b>                      |           |        |        |          |         |           |        |        |          |         |
| Average per-serving                  | 102.81    | 102.82 | 0.00   | 0.00%    | 0.3178  | 102.52    | 102.52 | 0.00   | 0.00%    | 0.3178  |
| Standard deviation                   | 41.37     | 41.37  |        |          |         | 42.05     | 42.05  |        |          |         |
| <b>Saturated fat (grams)</b>         |           |        |        |          |         |           |        |        |          |         |
| Average per-serving                  |           |        |        |          |         |           |        |        |          |         |
| Standard deviation                   |           |        |        |          |         |           |        |        |          |         |
| <b>Sugar (grams)**</b>               |           |        |        |          |         |           |        |        |          |         |
| Average per-serving                  | 25.43     | 25.44  | 0.00   | 0.00%    | 0.3178  | 25.36     |        |        |          |         |
| Standard deviation                   | 10.30     | 10.30  |        |          |         | 10.47     |        |        |          |         |
| <b>Sodium (milligrams)</b>           |           |        |        |          |         |           |        |        |          |         |
| Average per-serving                  | 40.09     | 40.10  | 0.00   | 0.00%    | 0.3178  | 40.95     | 40.95  | 0.00   | 0.00%    | 0.3178  |
| Standard deviation                   | 26.32     | 26.32  |        |          |         | 26.42     | 26.42  |        |          |         |
| <b>Dietary fiber (grams)</b>         |           |        |        |          |         |           |        |        |          |         |
| Average per-serving                  |           |        |        |          |         |           |        |        |          |         |
| Standard deviation                   |           |        |        |          |         |           |        |        |          |         |
| <b>No. of UPCs</b>                   | 526       |        |        |          |         | 457       |        |        |          |         |

\*Serving = 240 grams (8 oz)

\*\*Sugar data is unavailable for 2015

## Types and Frequencies of Reformulation: Ice Cream

Calculations using InfoScan Data for UPCs with positive sales

| Average per-serving nutrient values* | 2012-2014 |        |        |          |         | 2012-2015 |        |        |          |         |
|--------------------------------------|-----------|--------|--------|----------|---------|-----------|--------|--------|----------|---------|
|                                      | 2012      | 2014   | Change | % Change | p-value | 2012      | 2015   | Change | % Change | p-value |
| <b>All UPCs</b>                      |           |        |        |          |         |           |        |        |          |         |
| <b>Calories</b>                      |           |        |        |          |         |           |        |        |          |         |
| Average per-serving                  | 139.99    | 140.00 | 0.01   | 0.01%    | 0.8696  | 140.23    | 140.25 | 0.02   | 0.01%    | 0.7329  |
| Standard deviation                   | 38.73     | 38.67  |        |          |         | 38.81     | 38.75  |        |          |         |
| <b>Saturated fat (grams)</b>         |           |        |        |          |         |           |        |        |          |         |
| Average per-serving                  | 4.05      | 3.92   | -0.13  | -3.31%   | 0.0000  | 4.08      | 3.94   | -0.13  | -3.26%   | 0.0000  |
| Standard deviation                   | 2.26      | 2.28   |        |          |         | 2.26      | 2.29   |        |          |         |
| <b>Sugar (grams)**</b>               |           |        |        |          |         |           |        |        |          |         |
| Average per-serving                  | 13.74     | 13.74  | 0.00   | -0.03%   | 0.2374  | 13.69     |        |        |          |         |
| Standard deviation                   | 3.22      | 3.21   |        |          |         | 3.25      |        |        |          |         |
| <b>Sodium (milligrams)</b>           |           |        |        |          |         |           |        |        |          |         |
| Average per-serving                  | 57.99     | 57.97  | -0.02  | -0.03%   | 0.5658  | 57.88     | 57.87  | -0.01  | -0.02%   | 0.8084  |
| Standard deviation                   | 31.85     | 31.80  |        |          |         | 31.64     | 31.59  |        |          |         |
| <b>Dietary fiber (grams)</b>         |           |        |        |          |         |           |        |        |          |         |
| Average per-serving                  | 0.52      | 0.52   | 0.00   | 0.09%    | 0.4768  | 0.53      | 0.53   | 0.00   | 0.18%    | 0.2515  |
| Standard deviation                   | 0.94      | 0.94   |        |          |         | 0.95      | 0.96   |        |          |         |
| <b>No. of UPCs</b>                   | 4,390     |        |        |          |         | 3,924     |        |        |          |         |
| <b>Branded UPCs</b>                  |           |        |        |          |         |           |        |        |          |         |
| <b>Calories</b>                      |           |        |        |          |         |           |        |        |          |         |
| Average per-serving                  | 141.40    | 141.42 | 0.02   | 0.01%    | 0.7074  | 141.27    | 141.32 | 0.04   | 0.03%    | 0.4372  |
| Standard deviation                   | 40.56     | 40.49  |        |          |         | 40.60     | 40.54  |        |          |         |
| <b>Saturated fat (grams)</b>         |           |        |        |          |         |           |        |        |          |         |
| Average per-serving                  | 4.11      | 3.98   | -0.13  | -3.16%   | 0.0000  | 4.14      | 4.01   | -0.13  | -3.05%   | 0.0000  |
| Standard deviation                   | 2.38      | 2.40   |        |          |         | 2.37      | 2.40   |        |          |         |
| <b>Sugar (grams)**</b>               |           |        |        |          |         |           |        |        |          |         |
| Average per-serving                  | 13.66     | 13.65  | 0.00   | -0.03%   | 0.4237  | 13.61     |        |        |          |         |
| Standard deviation                   | 3.33      | 3.32   |        |          |         | 3.36      |        |        |          |         |
| <b>Sodium (milligrams)</b>           |           |        |        |          |         |           |        |        |          |         |
| Average per-serving                  | 57.38     | 57.35  | -0.03  | -0.05%   | 0.5173  | 56.90     | 56.86  | -0.03  | -0.05%   | 0.5813  |
| Standard deviation                   | 32.67     | 32.59  |        |          |         | 32.12     | 32.05  |        |          |         |
| <b>Dietary fiber (grams)</b>         |           |        |        |          |         |           |        |        |          |         |
| Average per-serving                  | 0.63      | 0.63   | 0.00   | 0.15%    | 0.3213  | 0.63      | 0.63   | 0.00   | 0.23%    | 0.2516  |
| Standard deviation                   | 1.05      | 1.05   |        |          |         | 1.06      | 1.06   |        |          |         |
| <b>No. of UPCs</b>                   | 2,820     |        |        |          |         | 2,591     |        |        |          |         |
| <b>Private Label UPCs</b>            |           |        |        |          |         |           |        |        |          |         |
| <b>Calories</b>                      |           |        |        |          |         |           |        |        |          |         |
| Average per-serving                  | 137.45    | 137.44 | -0.01  | -0.01%   | 0.9251  | 138.19    | 138.17 | -0.03  | -0.02%   | 0.8291  |
| Standard deviation                   | 35.09     | 35.03  |        |          |         | 35.00     | 34.96  |        |          |         |
| <b>Saturated fat (grams)</b>         |           |        |        |          |         |           |        |        |          |         |
| Average per-serving                  | 3.95      | 3.81   | -0.14  | -3.59%   | 0.0000  | 3.95      | 3.81   | -0.15  | -3.69%   | 0.0000  |
| Standard deviation                   | 2.04      | 2.06   |        |          |         | 2.04      | 2.06   |        |          |         |
| <b>Sugar (grams)**</b>               |           |        |        |          |         |           |        |        |          |         |
| Average per-serving                  | 13.89     | 13.89  | 0.00   | -0.03%   | 0.1574  | 13.84     |        |        |          |         |
| Standard deviation                   | 3.01      | 3.01   |        |          |         | 3.02      |        |        |          |         |
| <b>Sodium (milligrams)</b>           |           |        |        |          |         |           |        |        |          |         |
| Average per-serving                  | 59.08     | 59.09  | 0.01   | 0.01%    | 0.5718  | 59.79     | 59.83  | 0.03   | 0.05%    | 0.1344  |
| Standard deviation                   | 30.30     | 30.30  |        |          |         | 30.61     | 30.60  |        |          |         |
| <b>Dietary fiber (grams)</b>         |           |        |        |          |         |           |        |        |          |         |
| Average per-serving                  | 0.32      | 0.32   | 0.00   | -0.14%   | 0.3175  | 0.33      | 0.33   | 0.00   | 0.00%    |         |
| Standard deviation                   | 0.65      | 0.65   |        |          |         | 0.67      | 0.67   |        |          |         |
| <b>No. of UPCs</b>                   | 1,569     |        |        |          |         | 1,332     |        |        |          |         |

\*Serving = 65 grams

\*\*Sugar data is unavailable for 2015

## Types and Frequencies of Reformulation: Lunch Combinations

Calculations using InfoScan Data for UPCs with positive sales

| Average per-serving nutrient values* | 2012-2014 |        |        |          |         | 2012-2015 |        |        |          |         |
|--------------------------------------|-----------|--------|--------|----------|---------|-----------|--------|--------|----------|---------|
|                                      | 2012      | 2014   | Change | % Change | p-value | 2012      | 2015   | Change | % Change | p-value |
| <b>All UPCs</b>                      |           |        |        |          |         |           |        |        |          |         |
| <b>Calories</b>                      |           |        |        |          |         |           |        |        |          |         |
| Average per-serving                  | 320.06    | 346.88 | 26.83  | 8.38%    | 0.0251  | 326.77    | 359.19 | 32.42  | 9.92%    | 0.0248  |
| Standard deviation                   | 116.89    | 113.99 |        |          |         | 102.35    | 95.72  |        |          |         |
| <b>Saturated fat (grams)</b>         |           |        |        |          |         |           |        |        |          |         |
| Average per-serving                  | 5.60      | 5.87   | 0.28   | 4.95%    | 0.2459  | 6.00      | 6.40   | 0.40   | 6.63%    | 0.1650  |
| Standard deviation                   | 3.33      | 3.51   |        |          |         | 3.03      | 3.14   |        |          |         |
| <b>Sugar (grams)**</b>               |           |        |        |          |         |           |        |        |          |         |
| Average per-serving                  | 17.35     | 19.17  | 1.83   | 10.53%   | 0.0534  | 16.49     |        |        |          |         |
| Standard deviation                   | 10.63     | 11.86  |        |          |         | 10.42     |        |        |          |         |
| <b>Sodium (milligrams)</b>           |           |        |        |          |         |           |        |        |          |         |
| Average per-serving                  | 706.12    | 737.90 | 31.79  | 4.50%    | 0.1702  | 756.65    | 795.49 | 38.84  | 5.13%    | 0.1659  |
| Standard deviation                   | 330.20    | 313.98 |        |          |         | 311.79    | 284.50 |        |          |         |
| <b>Dietary fiber (grams)</b>         |           |        |        |          |         |           |        |        |          |         |
| Average per-serving                  | 1.33      | 1.44   | 0.12   | 8.70%    | 0.0325  | 1.28      | 1.42   | 0.14   | 10.91%   | 0.0322  |
| Standard deviation                   | 1.00      | 1.07   |        |          |         | 0.98      | 1.07   |        |          |         |
| <b>No. of UPCs</b>                   | 52        |        |        |          |         | 43        |        |        |          |         |
| <b>Branded UPCs</b>                  |           |        |        |          |         |           |        |        |          |         |
| <b>Calories</b>                      |           |        |        |          |         |           |        |        |          |         |
| Average per-serving                  | 320.06    | 346.88 | 26.83  | 8.38%    | 0.0251  | 326.77    | 359.19 | 32.42  | 9.92%    | 0.0248  |
| Standard deviation                   | 116.89    | 113.99 |        |          |         | 102.35    | 95.72  |        |          |         |
| <b>Saturated fat (grams)</b>         |           |        |        |          |         |           |        |        |          |         |
| Average per-serving                  | 5.60      | 5.87   | 0.28   | 4.95%    | 0.2459  | 6.00      | 6.40   | 0.40   | 6.63%    | 0.1650  |
| Standard deviation                   | 3.33      | 3.51   |        |          |         | 3.03      | 3.14   |        |          |         |
| <b>Sugar (grams)**</b>               |           |        |        |          |         |           |        |        |          |         |
| Average per-serving                  | 17.35     | 19.17  | 1.83   | 10.53%   | 0.0534  | 16.49     |        |        |          |         |
| Standard deviation                   | 10.63     | 11.86  |        |          |         | 10.42     |        |        |          |         |
| <b>Sodium (milligrams)</b>           |           |        |        |          |         |           |        |        |          |         |
| Average per-serving                  | 706.12    | 737.90 | 31.79  | 4.50%    | 0.1702  | 756.65    | 795.49 | 38.84  | 5.13%    | 0.1659  |
| Standard deviation                   | 330.20    | 313.98 |        |          |         | 311.79    | 284.50 |        |          |         |
| <b>Dietary fiber (grams)</b>         |           |        |        |          |         |           |        |        |          |         |
| Average per-serving                  | 1.33      | 1.44   | 0.12   | 8.70%    | 0.0325  | 1.28      | 1.42   | 0.14   | 10.91%   | 0.0322  |
| Standard deviation                   | 1.00      | 1.07   |        |          |         | 0.98      | 1.07   |        |          |         |
| <b>No. of UPCs</b>                   | 52        |        |        |          |         | 43        |        |        |          |         |
| <b>Private Label UPCs</b>            |           |        |        |          |         |           |        |        |          |         |
| <b>Calories</b>                      |           |        |        |          |         |           |        |        |          |         |
| Average per-serving                  |           |        |        |          |         |           |        |        |          |         |
| Standard deviation                   |           |        |        |          |         |           |        |        |          |         |
| <b>Saturated fat (grams)</b>         |           |        |        |          |         |           |        |        |          |         |
| Average per-serving                  |           |        |        |          |         |           |        |        |          |         |
| Standard deviation                   |           |        |        |          |         |           |        |        |          |         |
| <b>Sugar (grams)**</b>               |           |        |        |          |         |           |        |        |          |         |
| Average per-serving                  |           |        |        |          |         |           |        |        |          |         |
| Standard deviation                   |           |        |        |          |         |           |        |        |          |         |
| <b>Sodium (milligrams)</b>           |           |        |        |          |         |           |        |        |          |         |
| Average per-serving                  |           |        |        |          |         |           |        |        |          |         |
| Standard deviation                   |           |        |        |          |         |           |        |        |          |         |
| <b>Dietary fiber (grams)</b>         |           |        |        |          |         |           |        |        |          |         |
| Average per-serving                  |           |        |        |          |         |           |        |        |          |         |
| Standard deviation                   |           |        |        |          |         |           |        |        |          |         |
| <b>No. of UPCs</b>                   |           |        |        |          |         |           |        |        |          |         |

\*Serving = 128 grams

\*\*Sugar data is unavailable for 2015



# Types and Frequencies of Reformulation: Macaroni & Cheese (RTE)

Calculations using InfoScan Data for UPCs with positive sales

| Average per-serving nutrient values* | 2012-2014 |        |        |          |         | 2012-2015 |        |        |          |         |
|--------------------------------------|-----------|--------|--------|----------|---------|-----------|--------|--------|----------|---------|
|                                      | 2012      | 2014   | Change | % Change | p-value | 2012      | 2015   | Change | % Change | p-value |
| <b>All UPCs</b>                      |           |        |        |          |         |           |        |        |          |         |
| <b>Calories</b>                      |           |        |        |          |         |           |        |        |          |         |
| Average per-serving                  | 337.45    | 337.19 | -0.26  | -0.08%   | 0.3219  | 337.57    | 337.28 | -0.30  | -0.09%   | 0.3225  |
| Standard deviation                   | 79.40     | 79.87  |        |          |         | 82.93     | 83.44  |        |          |         |
| <b>Saturated fat (grams)</b>         |           |        |        |          |         |           |        |        |          |         |
| Average per-serving                  | 6.89      | 6.83   | -0.06  | -0.85%   | 0.1033  | 7.09      | 7.02   | -0.07  | -0.93%   | 0.1033  |
| Standard deviation                   | 4.21      | 4.25   |        |          |         | 4.32      | 4.37   |        |          |         |
| <b>Sugar (grams)**</b>               |           |        |        |          |         |           |        |        |          |         |
| Average per-serving                  | 4.28      | 4.28   | 0.00   | 0.00%    |         | 4.32      |        |        |          |         |
| Standard deviation                   | 2.19      | 2.19   |        |          |         | 2.20      |        |        |          |         |
| <b>Sodium (milligrams)</b>           |           |        |        |          |         |           |        |        |          |         |
| Average per-serving                  | 732.81    | 731.68 | -1.13  | -0.15%   | 0.3219  | 722.36    | 721.09 | -1.28  | -0.18%   | 0.3225  |
| Standard deviation                   | 242.04    | 239.97 |        |          |         | 235.94    | 233.48 |        |          |         |
| <b>Dietary fiber (grams)</b>         |           |        |        |          |         |           |        |        |          |         |
| Average per-serving                  | 2.28      | 2.28   | 0.00   | 0.00%    |         | 2.26      | 2.26   | 0.00   | 0.00%    |         |
| Standard deviation                   | 1.13      | 1.13   |        |          |         | 1.09      | 1.09   |        |          |         |
| <b>No. of UPCs</b>                   | 53        |        |        |          |         | 47        |        |        |          |         |
| <b>Branded UPCs</b>                  |           |        |        |          |         |           |        |        |          |         |
| <b>Calories</b>                      |           |        |        |          |         |           |        |        |          |         |
| Average per-serving                  | 329.14    | 328.82 | -0.32  | -0.10%   | 0.3229  | 329.10    | 328.74 | -0.36  | -0.11%   | 0.3236  |
| Standard deviation                   | 75.51     | 76.08  |        |          |         | 78.68     | 79.30  |        |          |         |
| <b>Saturated fat (grams)</b>         |           |        |        |          |         |           |        |        |          |         |
| Average per-serving                  | 6.18      | 6.11   | -0.07  | -1.14%   | 0.1034  | 6.41      | 6.33   | -0.08  | -1.24%   | 0.1034  |
| Standard deviation                   | 3.43      | 3.48   |        |          |         | 3.51      | 3.57   |        |          |         |
| <b>Sugar (grams)**</b>               |           |        |        |          |         |           |        |        |          |         |
| Average per-serving                  | 4.14      | 4.14   | 0.00   | 0.00%    |         | 4.18      |        |        |          |         |
| Standard deviation                   | 2.16      | 2.16   |        |          |         | 2.15      |        |        |          |         |
| <b>Sodium (milligrams)</b>           |           |        |        |          |         |           |        |        |          |         |
| Average per-serving                  | 709.02    | 707.66 | -1.36  | -0.19%   | 0.3229  | 705.33    | 703.79 | -1.54  | -0.22%   | 0.3236  |
| Standard deviation                   | 239.64    | 236.97 |        |          |         | 240.71    | 237.67 |        |          |         |
| <b>Dietary fiber (grams)</b>         |           |        |        |          |         |           |        |        |          |         |
| Average per-serving                  | 2.39      | 2.39   | 0.00   | 0.00%    |         | 2.36      | 2.36   | 0.00   | 0.00%    |         |
| Standard deviation                   | 1.15      | 1.15   |        |          |         | 1.09      | 1.09   |        |          |         |
| <b>No. of UPCs</b>                   | 44        |        |        |          |         | 39        |        |        |          |         |
| <b>Private Label UPCs</b>            |           |        |        |          |         |           |        |        |          |         |
| <b>Calories</b>                      |           |        |        |          |         |           |        |        |          |         |
| Average per-serving                  | 378.11    | 378.11 | 0.00   | 0.00%    |         | 378.88    | 378.88 | 0.00   | 0.00%    |         |
| Standard deviation                   | 89.93     | 89.93  |        |          |         | 96.11     | 96.11  |        |          |         |
| <b>Saturated fat (grams)</b>         |           |        |        |          |         |           |        |        |          |         |
| Average per-serving                  | 10.33     | 10.33  | 0.00   | 0.00%    |         | 10.38     | 10.38  | 0.00   | 0.00%    |         |
| Standard deviation                   | 5.98      | 5.98   |        |          |         | 6.39      | 6.39   |        |          |         |
| <b>Sugar (grams)**</b>               |           |        |        |          |         |           |        |        |          |         |
| Average per-serving                  | 5.00      | 5.00   | 0.00   | 0.00%    |         | 5.00      |        |        |          |         |
| Standard deviation                   | 2.29      | 2.29   |        |          |         | 2.45      |        |        |          |         |
| <b>Sodium (milligrams)</b>           |           |        |        |          |         |           |        |        |          |         |
| Average per-serving                  | 849.11    | 849.11 | 0.00   | 0.00%    |         | 805.38    | 805.38 | 0.00   | 0.00%    |         |
| Standard deviation                   | 231.89    | 231.89 |        |          |         | 204.40    | 204.40 |        |          |         |
| <b>Dietary fiber (grams)</b>         |           |        |        |          |         |           |        |        |          |         |
| Average per-serving                  | 1.78      | 1.78   | 0.00   | 0.00%    |         | 1.75      | 1.75   | 0.00   | 0.00%    |         |
| Standard deviation                   | 0.97      | 0.97   |        |          |         | 1.04      | 1.04   |        |          |         |
| <b>No. of UPCs</b>                   | 9         |        |        |          |         | 8         |        |        |          |         |

\*Serving =227 grams

\*\*Sugar data is unavailable for 2015

## Types and Frequencies of Reformulation: **Macaroni and Cheese (Mixes)**

Calculations using InfoScan Data for UPCs with positive sales

| Average per-serving nutrient values* | 2012-2014 |        |        |          |         | 2012-2015 |        |        |          |         |
|--------------------------------------|-----------|--------|--------|----------|---------|-----------|--------|--------|----------|---------|
|                                      | 2012      | 2014   | Change | % Change | p-value | 2012      | 2015   | Change | % Change | p-value |
| <b>All UPCs</b>                      |           |        |        |          |         |           |        |        |          |         |
| <b>Calories</b>                      |           |        |        |          |         |           |        |        |          |         |
| Average per-serving                  | 243.82    | 243.95 | 0.12   | 0.05%    | 0.2952  | 243.83    | 243.92 | 0.09   | 0.04%    | 0.5111  |
| Standard deviation                   | 25.90     | 25.83  |        |          |         | 26.24     | 26.25  |        |          |         |
| <b>Saturated fat (grams)</b>         |           |        |        |          |         |           |        |        |          |         |
| Average per-serving                  | 1.94      | 1.77   | -0.17  | -8.72%   | 0.0000  | 1.96      | 1.79   | -0.17  | -8.83%   | 0.0000  |
| Standard deviation                   | 1.18      | 1.18   |        |          |         | 1.19      | 1.19   |        |          |         |
| <b>Sugar (grams)**</b>               |           |        |        |          |         |           |        |        |          |         |
| Average per-serving                  | 4.66      | 4.67   | 0.00   | 0.06%    | 0.3180  | 4.67      |        |        |          |         |
| Standard deviation                   | 2.32      | 2.33   |        |          |         | 2.34      |        |        |          |         |
| <b>Sodium (milligrams)</b>           |           |        |        |          |         |           |        |        |          |         |
| Average per-serving                  | 590.16    | 590.45 | 0.29   | 0.05%    | 0.2933  | 588.64    | 588.90 | 0.26   | 0.04%    | 0.4061  |
| Standard deviation                   | 100.45    | 100.25 |        |          |         | 102.31    | 101.98 |        |          |         |
| <b>Dietary fiber (grams)</b>         |           |        |        |          |         |           |        |        |          |         |
| Average per-serving                  | 1.61      | 1.62   | 0.00   | 0.18%    | 0.3180  | 1.61      | 1.61   | 0.00   | 0.19%    | 0.3181  |
| Standard deviation                   | 0.89      | 0.90   |        |          |         | 0.86      | 0.88   |        |          |         |
| <b>No. of UPCs</b>                   | 345       |        |        |          |         | 319       |        |        |          |         |
| <b>Branded UPCs</b>                  |           |        |        |          |         |           |        |        |          |         |
| <b>Calories</b>                      |           |        |        |          |         |           |        |        |          |         |
| Average per-serving                  | 243.41    | 243.69 | 0.28   | 0.12%    | 0.2961  | 243.44    | 243.71 | 0.26   | 0.11%    | 0.3597  |
| Standard deviation                   | 33.51     | 33.38  |        |          |         | 34.32     | 34.37  |        |          |         |
| <b>Saturated fat (grams)</b>         |           |        |        |          |         |           |        |        |          |         |
| Average per-serving                  | 2.10      | 1.91   | -0.19  | -9.07%   | 0.0000  | 2.12      | 1.92   | -0.19  | -9.15%   | 0.0000  |
| Standard deviation                   | 0.98      | 0.90   |        |          |         | 0.99      | 0.92   |        |          |         |
| <b>Sugar (grams)**</b>               |           |        |        |          |         |           |        |        |          |         |
| Average per-serving                  | 5.05      | 5.06   | 0.01   | 0.13%    | 0.3189  | 5.05      |        |        |          |         |
| Standard deviation                   | 2.13      | 2.14   |        |          |         | 2.13      |        |        |          |         |
| <b>Sodium (milligrams)</b>           |           |        |        |          |         |           |        |        |          |         |
| Average per-serving                  | 570.11    | 570.76 | 0.65   | 0.11%    | 0.2941  | 567.08    | 567.86 | 0.78   | 0.14%    | 0.2361  |
| Standard deviation                   | 113.45    | 113.17 |        |          |         | 114.70    | 114.12 |        |          |         |
| <b>Dietary fiber (grams)</b>         |           |        |        |          |         |           |        |        |          |         |
| Average per-serving                  | 1.67      | 1.68   | 0.01   | 0.39%    | 0.3189  | 1.65      | 1.66   | 0.01   | 0.42%    | 0.3190  |
| Standard deviation                   | 1.16      | 1.18   |        |          |         | 1.10      | 1.12   |        |          |         |
| <b>No. of UPCs</b>                   | 153       |        |        |          |         | 144       |        |        |          |         |
| <b>Private Label UPCs</b>            |           |        |        |          |         |           |        |        |          |         |
| <b>Calories</b>                      |           |        |        |          |         |           |        |        |          |         |
| Average per-serving                  | 244.15    | 244.15 | 0.00   | 0.00%    |         | 244.15    | 244.10 | -0.06  | -0.02%   | 0.3187  |
| Standard deviation                   | 17.74     | 17.74  |        |          |         | 17.02     | 16.97  |        |          |         |
| <b>Saturated fat (grams)</b>         |           |        |        |          |         |           |        |        |          |         |
| Average per-serving                  | 1.82      | 1.67   | -0.15  | -8.40%   | 0.0000  | 1.83      | 1.68   | -0.16  | -8.54%   | 0.0000  |
| Standard deviation                   | 1.31      | 1.36   |        |          |         | 1.32      | 1.37   |        |          |         |
| <b>Sugar (grams)**</b>               |           |        |        |          |         |           |        |        |          |         |
| Average per-serving                  | 4.35      | 4.35   | 0.00   | 0.00%    |         | 4.37      |        |        |          |         |
| Standard deviation                   | 2.43      | 2.43   |        |          |         | 2.47      |        |        |          |         |
| <b>Sodium (milligrams)</b>           |           |        |        |          |         |           |        |        |          |         |
| Average per-serving                  | 606.14    | 606.14 | 0.00   | 0.00%    |         | 606.38    | 606.21 | -0.17  | -0.03%   | 0.3187  |
| Standard deviation                   | 85.73     | 85.73  |        |          |         | 87.26     | 87.38  |        |          |         |
| <b>Dietary fiber (grams)</b>         |           |        |        |          |         |           |        |        |          |         |
| Average per-serving                  | 1.57      | 1.57   | 0.00   | 0.00%    |         | 1.57      | 1.57   | 0.00   | 0.00%    |         |
| Standard deviation                   | 0.59      | 0.59   |        |          |         | 0.60      | 0.60   |        |          |         |
| <b>No. of UPCs</b>                   | 192       |        |        |          |         | 175       |        |        |          |         |

\*Serving = 70 grams

\*\*Sugar data is unavailable for 2015

## Types and Frequencies of Reformulation: **Nut Butters**

Calculations using InfoScan Data for UPCs with positive sales

| Average per-serving nutrient values* | 2012-2014 |        |        |          |         | 2012-2015 |        |        |          |         |
|--------------------------------------|-----------|--------|--------|----------|---------|-----------|--------|--------|----------|---------|
|                                      | 2012      | 2014   | Change | % Change | p-value | 2012      | 2015   | Change | % Change | p-value |
| <b>All UPCs</b>                      |           |        |        |          |         |           |        |        |          |         |
| <b>Calories</b>                      |           |        |        |          |         |           |        |        |          |         |
| Average per-serving                  | 188.62    | 188.72 | 0.10   | 0.05%    | 0.4673  | 188.60    | 188.62 | 0.03   | 0.01%    | 0.8695  |
| Standard deviation                   | 20.28     | 19.80  |        |          |         | 19.62     | 19.04  |        |          |         |
| <b>Saturated fat (grams)</b>         |           |        |        |          |         |           |        |        |          |         |
| Average per-serving                  | 2.87      | 2.65   | -0.22  | -7.70%   | 0.0000  | 2.88      | 2.66   | -0.23  | -7.86%   | 0.0000  |
| Standard deviation                   | 0.87      | 0.78   |        |          |         | 0.86      | 0.78   |        |          |         |
| <b>Sugar (grams)**</b>               |           |        |        |          |         |           |        |        |          |         |
| Average per-serving                  | 3.65      | 3.65   | 0.00   | 0.08%    | 0.1639  | 3.64      |        |        |          |         |
| Standard deviation                   | 3.59      | 3.59   |        |          |         | 3.56      |        |        |          |         |
| <b>Sodium (milligrams)</b>           |           |        |        |          |         |           |        |        |          |         |
| Average per-serving                  | 100.87    | 100.87 | 0.00   | 0.00%    | 0.5828  | 101.24    | 101.23 | -0.01  | -0.01%   | 0.7068  |
| Standard deviation                   | 54.33     | 54.32  |        |          |         | 54.46     | 54.45  |        |          |         |
| <b>Dietary fiber (grams)</b>         |           |        |        |          |         |           |        |        |          |         |
| Average per-serving                  | 2.17      | 2.17   | 0.00   | -0.03%   | 0.7940  | 2.17      | 2.17   | 0.00   | 0.13%    | 0.3461  |
| Standard deviation                   | 0.78      | 0.78   |        |          |         | 0.79      | 0.78   |        |          |         |
| <b>No. of UPCs</b>                   | 565       |        |        |          |         | 524       |        |        |          |         |
| <b>Branded UPCs</b>                  |           |        |        |          |         |           |        |        |          |         |
| <b>Calories</b>                      |           |        |        |          |         |           |        |        |          |         |
| Average per-serving                  | 186.50    | 186.68 | 0.19   | 0.10%    | 0.4677  | 186.45    | 186.67 | 0.22   | 0.12%    | 0.4225  |
| Standard deviation                   | 22.91     | 22.16  |        |          |         | 21.85     | 20.96  |        |          |         |
| <b>Saturated fat (grams)</b>         |           |        |        |          |         |           |        |        |          |         |
| Average per-serving                  | 2.62      | 2.42   | -0.20  | -7.68%   | 0.0000  | 2.64      | 2.43   | -0.21  | -7.91%   | 0.0000  |
| Standard deviation                   | 0.82      | 0.75   |        |          |         | 0.82      | 0.76   |        |          |         |
| <b>Sugar (grams)**</b>               |           |        |        |          |         |           |        |        |          |         |
| Average per-serving                  | 3.59      | 3.60   | 0.01   | 0.15%    | 0.1641  | 3.58      |        |        |          |         |
| Standard deviation                   | 3.69      | 3.70   |        |          |         | 3.58      |        |        |          |         |
| <b>Sodium (milligrams)</b>           |           |        |        |          |         |           |        |        |          |         |
| Average per-serving                  | 86.25     | 86.25  | 0.01   | 0.01%    | 0.5832  | 87.85     | 87.87  | 0.01   | 0.01%    | 0.4174  |
| Standard deviation                   | 56.17     | 56.15  |        |          |         | 56.23     | 56.21  |        |          |         |
| <b>Dietary fiber (grams)</b>         |           |        |        |          |         |           |        |        |          |         |
| Average per-serving                  | 2.29      | 2.29   | 0.00   | -0.06%   | 0.7942  | 2.28      | 2.28   | 0.00   | 0.08%    | 0.6868  |
| Standard deviation                   | 0.86      | 0.86   |        |          |         | 0.87      | 0.86   |        |          |         |
| <b>No. of UPCs</b>                   | 311       |        |        |          |         | 288       |        |        |          |         |
| <b>Private Label UPCs</b>            |           |        |        |          |         |           |        |        |          |         |
| <b>Calories</b>                      |           |        |        |          |         |           |        |        |          |         |
| Average per-serving                  | 191.22    | 191.22 | 0.00   | 0.00%    |         | 191.16    | 190.95 | -0.21  | -0.11%   | 0.0957  |
| Standard deviation                   | 16.16     | 16.16  |        |          |         | 16.17     | 16.14  |        |          |         |
| <b>Saturated fat (grams)</b>         |           |        |        |          |         |           |        |        |          |         |
| Average per-serving                  | 3.17      | 2.92   | -0.24  | -7.73%   | 0.0000  | 3.17      | 2.92   | -0.25  | -7.81%   | 0.0000  |
| Standard deviation                   | 0.83      | 0.72   |        |          |         | 0.82      | 0.73   |        |          |         |
| <b>Sugar (grams)**</b>               |           |        |        |          |         |           |        |        |          |         |
| Average per-serving                  | 3.72      | 3.72   | 0.00   | 0.00%    |         | 3.73      |        |        |          |         |
| Standard deviation                   | 3.46      | 3.46   |        |          |         | 3.55      |        |        |          |         |
| <b>Sodium (milligrams)</b>           |           |        |        |          |         |           |        |        |          |         |
| Average per-serving                  | 118.77    | 118.77 | 0.00   | 0.00%    |         | 117.82    | 117.78 | -0.04  | -0.04%   | 0.5648  |
| Standard deviation                   | 46.15     | 46.15  |        |          |         | 47.41     | 47.42  |        |          |         |
| <b>Dietary fiber (grams)</b>         |           |        |        |          |         |           |        |        |          |         |
| Average per-serving                  | 2.02      | 2.02   | 0.00   | 0.00%    |         | 2.03      | 2.03   | 0.00   | 0.21%    | 0.3183  |
| Standard deviation                   | 0.63      | 0.63   |        |          |         | 0.65      | 0.64   |        |          |         |
| <b>No. of UPCs</b>                   | 254       |        |        |          |         | 235       |        |        |          |         |

\*Serving = 32 grams

\*\*Sugar data is unavailable for 2015

## Types and Frequencies of Reformulation: [Pizza](#)

Calculations using InfoScan Data for UPCs with positive sales

| Average per-serving nutrient values* | 2012-2014 |        |        |          |         | 2012-2015 |        |        |          |         |
|--------------------------------------|-----------|--------|--------|----------|---------|-----------|--------|--------|----------|---------|
|                                      | 2012      | 2014   | Change | % Change | p-value | 2012      | 2015   | Change | % Change | p-value |
| <b>All UPCs</b>                      |           |        |        |          |         |           |        |        |          |         |
| <b>Calories</b>                      |           |        |        |          |         |           |        |        |          |         |
| Average per-serving                  | 337.43    | 337.05 | -0.38  | -0.11%   | 0.0373  | 337.91    | 337.46 | -0.45  | -0.13%   | 0.0336  |
| Standard deviation                   | 39.33     | 39.60  |        |          |         | 39.25     | 39.58  |        |          |         |
| <b>Saturated fat (grams)</b>         |           |        |        |          |         |           |        |        |          |         |
| Average per-serving                  | 6.00      | 5.89   | -0.11  | -1.87%   | 0.0000  | 6.00      | 5.89   | -0.11  | -1.90%   | 0.0000  |
| Standard deviation                   | 2.10      | 2.15   |        |          |         | 2.01      | 2.06   |        |          |         |
| <b>Sugar (grams)**</b>               |           |        |        |          |         |           |        |        |          |         |
| Average per-serving                  | 4.20      | 4.20   | -0.01  | -0.19%   | 0.3322  | 4.20      |        |        |          |         |
| Standard deviation                   | 2.64      | 2.62   |        |          |         | 2.52      |        |        |          |         |
| <b>Sodium (milligrams)</b>           |           |        |        |          |         |           |        |        |          |         |
| Average per-serving                  | 731.16    | 731.36 | 0.20   | 0.03%    | 0.5526  | 737.02    | 737.23 | 0.21   | 0.03%    | 0.5862  |
| Standard deviation                   | 175.92    | 176.23 |        |          |         | 172.43    | 172.82 |        |          |         |
| <b>Dietary fiber (grams)</b>         |           |        |        |          |         |           |        |        |          |         |
| Average per-serving                  | 2.31      | 2.31   | 0.00   | -0.08%   | 0.5702  | 2.30      | 2.30   | 0.00   | -0.10%   | 0.5274  |
| Standard deviation                   | 1.18      | 1.18   |        |          |         | 1.13      | 1.12   |        |          |         |
| <b>No. of UPCs</b>                   | 990       |        |        |          |         | 852       |        |        |          |         |
| <b>Branded UPCs</b>                  |           |        |        |          |         |           |        |        |          |         |
| <b>Calories</b>                      |           |        |        |          |         |           |        |        |          |         |
| Average per-serving                  | 340.83    | 340.83 | 0.00   | 0.00%    | 0.1575  | 341.42    | 341.41 | -0.01  | 0.00%    | 0.4606  |
| Standard deviation                   | 40.51     | 40.51  |        |          |         | 40.24     | 40.26  |        |          |         |
| <b>Saturated fat (grams)</b>         |           |        |        |          |         |           |        |        |          |         |
| Average per-serving                  | 6.18      | 6.09   | -0.09  | -1.39%   | 0.0000  | 6.18      | 6.09   | -0.09  | -1.44%   | 0.0000  |
| Standard deviation                   | 1.98      | 2.06   |        |          |         | 1.97      | 2.05   |        |          |         |
| <b>Sugar (grams)**</b>               |           |        |        |          |         |           |        |        |          |         |
| Average per-serving                  | 4.46      | 4.46   | 0.00   | 0.00%    |         | 4.38      |        |        |          |         |
| Standard deviation                   | 2.81      | 2.81   |        |          |         | 2.58      |        |        |          |         |
| <b>Sodium (milligrams)</b>           |           |        |        |          |         |           |        |        |          |         |
| Average per-serving                  | 739.40    | 739.41 | 0.00   | 0.00%    | 0.1799  | 740.35    | 740.32 | -0.02  | 0.00%    | 0.4215  |
| Standard deviation                   | 176.02    | 176.01 |        |          |         | 174.78    | 174.82 |        |          |         |
| <b>Dietary fiber (grams)</b>         |           |        |        |          |         |           |        |        |          |         |
| Average per-serving                  | 2.42      | 2.42   | 0.00   | 0.01%    | 0.3177  | 2.39      | 2.39   | 0.00   | 0.00%    |         |
| Standard deviation                   | 1.32      | 1.32   |        |          |         | 1.24      | 1.24   |        |          |         |
| <b>No. of UPCs</b>                   | 672       |        |        |          |         | 600       |        |        |          |         |
| <b>Private Label UPCs</b>            |           |        |        |          |         |           |        |        |          |         |
| <b>Calories</b>                      |           |        |        |          |         |           |        |        |          |         |
| Average per-serving                  | 330.26    | 329.08 | -1.18  | -0.36%   | 0.0361  | 329.55    | 328.06 | -1.49  | -0.45%   | 0.0361  |
| Standard deviation                   | 35.74     | 36.40  |        |          |         | 35.47     | 36.27  |        |          |         |
| <b>Saturated fat (grams)</b>         |           |        |        |          |         |           |        |        |          |         |
| Average per-serving                  | 5.64      | 5.47   | -0.17  | -2.99%   | 0.0000  | 5.58      | 5.41   | -0.18  | -3.13%   | 0.0000  |
| Standard deviation                   | 2.29      | 2.29   |        |          |         | 2.04      | 2.01   |        |          |         |
| <b>Sugar (grams)**</b>               |           |        |        |          |         |           |        |        |          |         |
| Average per-serving                  | 3.67      | 3.65   | -0.03  | -0.68%   | 0.3328  | 3.76      |        |        |          |         |
| Standard deviation                   | 2.14      | 2.07   |        |          |         | 2.30      |        |        |          |         |
| <b>Sodium (milligrams)</b>           |           |        |        |          |         |           |        |        |          |         |
| Average per-serving                  | 713.75    | 714.35 | 0.60   | 0.08%    | 0.5593  | 729.09    | 729.85 | 0.76   | 0.10%    | 0.5595  |
| Standard deviation                   | 174.71    | 175.75 |        |          |         | 166.79    | 168.09 |        |          |         |
| <b>Dietary fiber (grams)</b>         |           |        |        |          |         |           |        |        |          |         |
| Average per-serving                  | 2.08      | 2.07   | -0.01  | -0.30%   | 0.5279  | 2.09      | 2.08   | -0.01  | -0.38%   | 0.5282  |
| Standard deviation                   | 0.78      | 0.76   |        |          |         | 0.75      | 0.73   |        |          |         |
| <b>No. of UPCs</b>                   | 318       |        |        |          |         | 252       |        |        |          |         |

\*Serving = 142 grams

\*\*Sugar data is unavailable for 2015

## Types and Frequencies of Reformulation: **Potato Chips**

Calculations using InfoScan Data for UPCs with positive sales

| Average per-serving nutrient values* | 2012-2014 |        |        |          |         | 2012-2015 |        |        |          |         |
|--------------------------------------|-----------|--------|--------|----------|---------|-----------|--------|--------|----------|---------|
|                                      | 2012      | 2014   | Change | % Change | p-value | 2012      | 2015   | Change | % Change | p-value |
| <b>All UPCs</b>                      |           |        |        |          |         |           |        |        |          |         |
| <b>Calories</b>                      |           |        |        |          |         |           |        |        |          |         |
| Average per-serving                  | 149.25    | 149.25 | 0.00   | 0.00%    | 0.9185  | 149.33    | 149.34 | 0.01   | 0.00%    | 0.7126  |
| Standard deviation                   | 12.21     | 12.23  |        |          |         | 11.65     | 11.68  |        |          |         |
| <b>Saturated fat (grams)</b>         |           |        |        |          |         |           |        |        |          |         |
| Average per-serving                  | 2.03      | 1.84   | -0.19  | -9.47%   | 0.0000  | 2.06      | 1.86   | -0.19  | -9.43%   | 0.0000  |
| Standard deviation                   | 0.91      | 0.87   |        |          |         | 0.91      | 0.87   |        |          |         |
| <b>Sugar (grams)**</b>               |           |        |        |          |         |           |        |        |          |         |
| Average per-serving                  | 0.83      | 0.83   | 0.00   | -0.15%   | 0.1574  | 0.82      |        |        |          |         |
| Standard deviation                   | 0.91      | 0.91   |        |          |         | 0.91      |        |        |          |         |
| <b>Sodium (milligrams)</b>           |           |        |        |          |         |           |        |        |          |         |
| Average per-serving                  | 195.90    | 196.02 | 0.12   | 0.06%    | 0.2090  | 194.38    | 194.49 | 0.11   | 0.05%    | 0.4129  |
| Standard deviation                   | 87.79     | 87.78  |        |          |         | 87.64     | 87.62  |        |          |         |
| <b>Dietary fiber (grams)</b>         |           |        |        |          |         |           |        |        |          |         |
| Average per-serving                  | 1.03      | 1.03   | 0.00   | -0.06%   | 0.1574  | 1.03      | 1.03   | 0.00   | -0.07%   | 0.1574  |
| Standard deviation                   | 0.33      | 0.33   |        |          |         | 0.33      | 0.33   |        |          |         |
| <b>No. of UPCs</b>                   | 1,610     |        |        |          |         | 1,473     |        |        |          |         |
| <b>Branded UPCs</b>                  |           |        |        |          |         |           |        |        |          |         |
| <b>Calories</b>                      |           |        |        |          |         |           |        |        |          |         |
| Average per-serving                  | 149.11    | 149.11 | 0.00   | 0.00%    | 0.9592  | 149.11    | 149.11 | 0.01   | 0.00%    | 0.7401  |
| Standard deviation                   | 12.52     | 12.53  |        |          |         | 11.79     | 11.83  |        |          |         |
| <b>Saturated fat (grams)</b>         |           |        |        |          |         |           |        |        |          |         |
| Average per-serving                  | 2.02      | 1.82   | -0.20  | -9.80%   | 0.0000  | 2.06      | 1.86   | -0.20  | -9.63%   | 0.0000  |
| Standard deviation                   | 0.91      | 0.86   |        |          |         | 0.91      | 0.86   |        |          |         |
| <b>Sugar (grams)**</b>               |           |        |        |          |         |           |        |        |          |         |
| Average per-serving                  | 0.87      | 0.87   | 0.00   | -0.17%   | 0.1574  | 0.85      |        |        |          |         |
| Standard deviation                   | 0.94      | 0.94   |        |          |         | 0.93      |        |        |          |         |
| <b>Sodium (milligrams)</b>           |           |        |        |          |         |           |        |        |          |         |
| Average per-serving                  | 195.58    | 195.72 | 0.15   | 0.07%    | 0.2090  | 195.27    | 195.40 | 0.12   | 0.06%    | 0.4129  |
| Standard deviation                   | 88.62     | 88.61  |        |          |         | 88.85     | 88.82  |        |          |         |
| <b>Dietary fiber (grams)</b>         |           |        |        |          |         |           |        |        |          |         |
| Average per-serving                  | 1.04      | 1.04   | 0.00   | -0.07%   | 0.1574  | 1.04      | 1.04   | 0.00   | -0.08%   | 0.1574  |
| Standard deviation                   | 0.30      | 0.30   |        |          |         | 0.31      | 0.31   |        |          |         |
| <b>No. of UPCs</b>                   | 1,362     |        |        |          |         | 1,265     |        |        |          |         |
| <b>Private Label UPCs</b>            |           |        |        |          |         |           |        |        |          |         |
| <b>Calories</b>                      |           |        |        |          |         |           |        |        |          |         |
| Average per-serving                  | 150.04    | 150.05 | 0.00   | 0.00%    | 0.3183  | 150.69    | 150.69 | 0.00   | 0.00%    | 0.3185  |
| Standard deviation                   | 10.37     | 10.35  |        |          |         | 10.67     | 10.65  |        |          |         |
| <b>Saturated fat (grams)</b>         |           |        |        |          |         |           |        |        |          |         |
| Average per-serving                  | 2.10      | 1.93   | -0.16  | -7.77%   | 0.0000  | 2.08      | 1.91   | -0.17  | -8.18%   | 0.0000  |
| Standard deviation                   | 0.95      | 0.93   |        |          |         | 0.97      | 0.95   |        |          |         |
| <b>Sugar (grams)**</b>               |           |        |        |          |         |           |        |        |          |         |
| Average per-serving                  | 0.65      | 0.65   | 0.00   | 0.00%    |         | 0.61      |        |        |          |         |
| Standard deviation                   | 0.72      | 0.72   |        |          |         | 0.71      |        |        |          |         |
| <b>Sodium (milligrams)</b>           |           |        |        |          |         |           |        |        |          |         |
| Average per-serving                  | 197.67    | 197.67 | 0.00   | 0.00%    |         | 188.96    | 188.96 | 0.00   | 0.00%    |         |
| Standard deviation                   | 83.20     | 83.20  |        |          |         | 79.89     | 79.89  |        |          |         |
| <b>Dietary fiber (grams)</b>         |           |        |        |          |         |           |        |        |          |         |
| Average per-serving                  | 0.97      | 0.97   | 0.00   | 0.00%    |         | 0.94      | 0.94   | 0.00   | 0.00%    |         |
| Standard deviation                   | 0.44      | 0.44   |        |          |         | 0.44      | 0.44   |        |          |         |
| <b>No. of UPCs</b>                   | 248       |        |        |          |         | 208       |        |        |          |         |

\*Serving = 28 grams

\*\*Sugar data is unavailable for 2015

## Types and Frequencies of Reformulation: RTE Cereal

Calculations using InfoScan Data for UPCs with positive sales

| Average per-serving nutrient values* | 2012-2014 |        |        |          |         | 2012-2015 |        |        |          |         |
|--------------------------------------|-----------|--------|--------|----------|---------|-----------|--------|--------|----------|---------|
|                                      | 2012      | 2014   | Change | % Change | p-value | 2012      | 2015   | Change | % Change | p-value |
| <b>All UPCs</b>                      |           |        |        |          |         |           |        |        |          |         |
| <b>Calories</b>                      |           |        |        |          |         |           |        |        |          |         |
| Average per-serving                  | 114.47    | 114.48 | 0.01   | 0.01%    | 0.5272  | 114.38    | 114.41 | 0.03   | 0.02%    | 0.1986  |
| Standard deviation                   | 11.56     | 11.55  |        |          |         | 11.69     | 11.68  |        |          |         |
| <b>Saturated fat (grams)</b>         |           |        |        |          |         |           |        |        |          |         |
| Average per-serving                  | 0.24      | 0.17   | -0.07  | -30.51%  | 0.0000  | 0.25      | 0.17   | -0.07  | -30.14%  | 0.0000  |
| Standard deviation                   | 0.46      | 0.36   |        |          |         | 0.47      | 0.37   |        |          |         |
| <b>Sugar (grams)**</b>               |           |        |        |          |         |           |        |        |          |         |
| Average per-serving                  | 7.80      | 7.80   | 0.00   | 0.02%    | 0.5638  | 7.59      |        |        |          |         |
| Standard deviation                   | 4.09      | 4.09   |        |          |         | 4.06      |        |        |          |         |
| <b>Sodium (milligrams)</b>           |           |        |        |          |         |           |        |        |          |         |
| Average per-serving                  | 134.03    | 134.01 | -0.02  | -0.02%   | 0.6013  | 131.12    | 131.01 | -0.12  | -0.09%   | 0.2145  |
| Standard deviation                   | 76.70     | 76.68  |        |          |         | 77.88     | 77.82  |        |          |         |
| <b>Dietary fiber (grams)</b>         |           |        |        |          |         |           |        |        |          |         |
| Average per-serving                  | 2.07      | 2.07   | 0.00   | -0.13%   | 0.3305  | 2.12      | 2.11   | 0.00   | -0.16%   | 0.3305  |
| Standard deviation                   | 1.68      | 1.68   |        |          |         | 1.63      | 1.63   |        |          |         |
| <b>No. of UPCs</b>                   | 2,149     |        |        |          |         | 1,797     |        |        |          |         |
| <b>Branded UPCs</b>                  |           |        |        |          |         |           |        |        |          |         |
| <b>Calories</b>                      |           |        |        |          |         |           |        |        |          |         |
| Average per-serving                  | 115.30    | 115.33 | 0.02   | 0.02%    | 0.4065  | 115.35    | 115.38 | 0.03   | 0.03%    | 0.3534  |
| Standard deviation                   | 11.44     | 11.44  |        |          |         | 11.68     | 11.65  |        |          |         |
| <b>Saturated fat (grams)</b>         |           |        |        |          |         |           |        |        |          |         |
| Average per-serving                  | 0.33      | 0.24   | -0.10  | -28.81%  | 0.0000  | 0.35      | 0.25   | -0.10  | -28.37%  | 0.0000  |
| Standard deviation                   | 0.51      | 0.41   |        |          |         | 0.52      | 0.42   |        |          |         |
| <b>Sugar (grams)**</b>               |           |        |        |          |         |           |        |        |          |         |
| Average per-serving                  | 7.88      | 7.88   | 0.00   | 0.03%    | 0.5639  | 7.80      |        |        |          |         |
| Standard deviation                   | 3.82      | 3.82   |        |          |         | 3.83      |        |        |          |         |
| <b>Sodium (milligrams)</b>           |           |        |        |          |         |           |        |        |          |         |
| Average per-serving                  | 117.46    | 117.37 | -0.10  | -0.08%   | 0.1116  | 115.39    | 115.29 | -0.10  | -0.09%   | 0.1542  |
| Standard deviation                   | 75.28     | 75.20  |        |          |         | 74.81     | 74.73  |        |          |         |
| <b>Dietary fiber (grams)</b>         |           |        |        |          |         |           |        |        |          |         |
| Average per-serving                  | 2.24      | 2.23   | -0.01  | -0.28%   | 0.2500  | 2.26      | 2.25   | -0.01  | -0.32%   | 0.2500  |
| Standard deviation                   | 1.57      | 1.56   |        |          |         | 1.55      | 1.55   |        |          |         |
| <b>No. of UPCs</b>                   | 1,102     |        |        |          |         | 968       |        |        |          |         |
| <b>Private Label UPCs</b>            |           |        |        |          |         |           |        |        |          |         |
| <b>Calories</b>                      |           |        |        |          |         |           |        |        |          |         |
| Average per-serving                  | 113.54    | 113.53 | -0.01  | -0.01%   | 0.1798  | 113.21    | 113.22 | 0.02   | 0.02%    | 0.2651  |
| Standard deviation                   | 11.55     | 11.54  |        |          |         | 11.53     | 11.55  |        |          |         |
| <b>Saturated fat (grams)</b>         |           |        |        |          |         |           |        |        |          |         |
| Average per-serving                  | 0.13      | 0.09   | -0.05  | -35.68%  | 0.0000  | 0.13      | 0.08   | -0.05  | -36.38%  | 0.0000  |
| Standard deviation                   | 0.37      | 0.28   |        |          |         | 0.36      | 0.26   |        |          |         |
| <b>Sugar (grams)**</b>               |           |        |        |          |         |           |        |        |          |         |
| Average per-serving                  | 7.72      | 7.72   | 0.00   | 0.00%    |         | 7.36      |        |        |          |         |
| Standard deviation                   | 4.35      | 4.35   |        |          |         | 4.31      |        |        |          |         |
| <b>Sodium (milligrams)</b>           |           |        |        |          |         |           |        |        |          |         |
| Average per-serving                  | 151.68    | 151.73 | 0.06   | 0.04%    | 0.3590  | 149.67    | 149.53 | -0.14  | -0.10%   | 0.4561  |
| Standard deviation                   | 74.22     | 74.23  |        |          |         | 77.32     | 77.29  |        |          |         |
| <b>Dietary fiber (grams)</b>         |           |        |        |          |         |           |        |        |          |         |
| Average per-serving                  | 1.89      | 1.90   | 0.00   | 0.05%    | 0.3175  | 1.95      | 1.95   | 0.00   | 0.06%    | 0.3176  |
| Standard deviation                   | 1.78      | 1.78   |        |          |         | 1.70      | 1.70   |        |          |         |
| <b>No. of UPCs</b>                   | 1,045     |        |        |          |         | 828       |        |        |          |         |

\*Serving = 30 grams

\*\*Sugar data is unavailable for 2015

## Types and Frequencies of Reformulation: [Soft Drinks](#)

Calculations using InfoScan Data for UPCs with positive sales

| Average per-serving nutrient values* | 2012-2014 |        |        |          |         | 2012-2015 |        |        |          |         |
|--------------------------------------|-----------|--------|--------|----------|---------|-----------|--------|--------|----------|---------|
|                                      | 2012      | 2014   | Change | % Change | p-value | 2012      | 2015   | Change | % Change | p-value |
| <b>All UPCs</b>                      |           |        |        |          |         |           |        |        |          |         |
| <b>Calories</b>                      |           |        |        |          |         |           |        |        |          |         |
| Average per-serving                  | 110.92    | 110.92 | -0.01  | 0.00%    | 0.7416  | 111.01    | 110.95 | -0.06  | -0.05%   | 0.1403  |
| Standard deviation                   | 22.97     | 22.99  |        |          |         | 23.13     | 23.23  |        |          |         |
| <b>Saturated fat (grams)</b>         |           |        |        |          |         |           |        |        |          |         |
| Average per-serving                  |           |        |        |          |         |           |        |        |          |         |
| Standard deviation                   |           |        |        |          |         |           |        |        |          |         |
| <b>Sugar (grams)**</b>               |           |        |        |          |         |           |        |        |          |         |
| Average per-serving                  | 28.63     | 28.63  | 0.00   | 0.00%    | 0.9114  | 28.65     |        |        |          |         |
| Standard deviation                   | 6.18      | 6.19   |        |          |         | 6.27      |        |        |          |         |
| <b>Sodium (milligrams)</b>           |           |        |        |          |         |           |        |        |          |         |
| Average per-serving                  | 27.27     | 27.27  | 0.00   | -0.01%   | 0.5159  | 27.23     | 27.21  | -0.02  | -0.08%   | 0.1025  |
| Standard deviation                   | 16.80     | 16.80  |        |          |         | 16.96     | 16.96  |        |          |         |
| <b>Dietary fiber (grams)</b>         |           |        |        |          |         |           |        |        |          |         |
| Average per-serving                  |           |        |        |          |         |           |        |        |          |         |
| Standard deviation                   |           |        |        |          |         |           |        |        |          |         |
| <b>No. of UPCs</b>                   | 2,276     |        |        |          |         | 2,182     |        |        |          |         |
| <b>Branded UPCs</b>                  |           |        |        |          |         |           |        |        |          |         |
| <b>Calories</b>                      |           |        |        |          |         |           |        |        |          |         |
| Average per-serving                  | 109.82    | 109.82 | -0.01  | -0.01%   | 0.7417  | 109.93    | 109.85 | -0.08  | -0.07%   | 0.1404  |
| Standard deviation                   | 23.39     | 23.43  |        |          |         | 23.47     | 23.60  |        |          |         |
| <b>Saturated fat (grams)</b>         |           |        |        |          |         |           |        |        |          |         |
| Average per-serving                  |           |        |        |          |         |           |        |        |          |         |
| Standard deviation                   |           |        |        |          |         |           |        |        |          |         |
| <b>Sugar (grams)**</b>               |           |        |        |          |         |           |        |        |          |         |
| Average per-serving                  | 28.36     | 28.36  | 0.00   | 0.00%    | 0.9114  | 28.39     |        |        |          |         |
| Standard deviation                   | 6.33      | 6.34   |        |          |         | 6.40      |        |        |          |         |
| <b>Sodium (milligrams)</b>           |           |        |        |          |         |           |        |        |          |         |
| Average per-serving                  | 29.62     | 29.61  | 0.00   | -0.02%   | 0.5159  | 29.52     | 29.49  | -0.03  | -0.11%   | 0.1025  |
| Standard deviation                   | 16.81     | 16.81  |        |          |         | 16.93     | 16.94  |        |          |         |
| <b>Dietary fiber (grams)</b>         |           |        |        |          |         |           |        |        |          |         |
| Average per-serving                  |           |        |        |          |         |           |        |        |          |         |
| Standard deviation                   |           |        |        |          |         |           |        |        |          |         |
| <b>No. of UPCs</b>                   | 1,662     |        |        |          |         | 1,603     |        |        |          |         |
| <b>Private Label UPCs</b>            |           |        |        |          |         |           |        |        |          |         |
| <b>Calories</b>                      |           |        |        |          |         |           |        |        |          |         |
| Average per-serving                  | 114.06    | 114.06 | 0.00   | 0.00%    |         | 114.17    | 114.17 | 0.00   | 0.00%    |         |
| Standard deviation                   | 21.64     | 21.64  |        |          |         | 22.02     | 22.02  |        |          |         |
| <b>Saturated fat (grams)</b>         |           |        |        |          |         |           |        |        |          |         |
| Average per-serving                  |           |        |        |          |         |           |        |        |          |         |
| Standard deviation                   |           |        |        |          |         |           |        |        |          |         |
| <b>Sugar (grams)**</b>               |           |        |        |          |         |           |        |        |          |         |
| Average per-serving                  | 29.41     | 29.41  | 0.00   | 0.00%    |         | 29.40     |        |        |          |         |
| Standard deviation                   | 5.71      | 5.71   |        |          |         | 5.83      |        |        |          |         |
| <b>Sodium (milligrams)</b>           |           |        |        |          |         |           |        |        |          |         |
| Average per-serving                  | 20.81     | 20.81  | 0.00   | 0.00%    |         | 20.79     | 20.79  | 0.00   | 0.00%    |         |
| Standard deviation                   | 15.27     | 15.27  |        |          |         | 15.59     | 15.59  |        |          |         |
| <b>Dietary fiber (grams)</b>         |           |        |        |          |         |           |        |        |          |         |
| Average per-serving                  |           |        |        |          |         |           |        |        |          |         |
| Standard deviation                   |           |        |        |          |         |           |        |        |          |         |
| <b>No. of UPCs</b>                   | 596       |        |        |          |         | 561       |        |        |          |         |

\*Serving = 240 grams

\*\*Sugar data is unavailable for 2015

## Types and Frequencies of Reformulation: Tortilla & Other Chips

Calculations using InfoScan Data for UPCs with positive sales

| Average per-serving nutrient values* | 2012-2014 |        |        |          |         | 2012-2015 |        |        |          |         |
|--------------------------------------|-----------|--------|--------|----------|---------|-----------|--------|--------|----------|---------|
|                                      | 2012      | 2014   | Change | % Change | p-value | 2012      | 2015   | Change | % Change | p-value |
| <b>All UPCs</b>                      |           |        |        |          |         |           |        |        |          |         |
| <b>Calories</b>                      |           |        |        |          |         |           |        |        |          |         |
| Average per-serving                  | 141.84    | 141.82 | -0.02  | -0.01%   | 0.4497  | 142.02    | 142.01 | -0.01  | -0.01%   | 0.6900  |
| Standard deviation                   | 16.05     | 16.04  |        |          |         | 16.21     | 16.19  |        |          |         |
| <b>Saturated fat (grams)</b>         |           |        |        |          |         |           |        |        |          |         |
| Average per-serving                  | 1.72      | 1.49   | -0.23  | -13.33%  | 0.0000  | 1.76      | 1.52   | -0.24  | -13.50%  | 0.0000  |
| Standard deviation                   | 1.36      | 1.26   |        |          |         | 1.39      | 1.28   |        |          |         |
| <b>Sugar (grams)**</b>               |           |        |        |          |         |           |        |        |          |         |
| Average per-serving                  | 0.74      | 0.74   | 0.00   | 0.00%    | 1.0000  | 0.73      |        |        |          |         |
| Standard deviation                   | 1.20      | 1.20   |        |          |         | 1.22      |        |        |          |         |
| <b>Sodium (milligrams)</b>           |           |        |        |          |         |           |        |        |          |         |
| Average per-serving                  | 215.46    | 215.52 | 0.07   | 0.03%    | 0.4344  | 222.27    | 222.47 | 0.20   | 0.09%    | 0.0991  |
| Standard deviation                   | 185.51    | 185.45 |        |          |         | 195.00    | 194.85 |        |          |         |
| <b>Dietary fiber (grams)</b>         |           |        |        |          |         |           |        |        |          |         |
| Average per-serving                  | 1.35      | 1.34   | -0.01  | -0.54%   | 0.0001  | 1.33      | 1.32   | -0.01  | -0.44%   | 0.0190  |
| Standard deviation                   | 0.92      | 0.91   |        |          |         | 0.94      | 0.93   |        |          |         |
| <b>No. of UPCs</b>                   | 1,476     |        |        |          |         | 1,235     |        |        |          |         |
| <b>Branded UPCs</b>                  |           |        |        |          |         |           |        |        |          |         |
| <b>Calories</b>                      |           |        |        |          |         |           |        |        |          |         |
| Average per-serving                  | 142.02    | 142.01 | -0.01  | -0.01%   | 0.6911  | 142.29    | 142.29 | -0.01  | 0.00%    | 0.8290  |
| Standard deviation                   | 16.41     | 16.39  |        |          |         | 16.55     | 16.53  |        |          |         |
| <b>Saturated fat (grams)</b>         |           |        |        |          |         |           |        |        |          |         |
| Average per-serving                  | 1.80      | 1.56   | -0.24  | -13.27%  | 0.0000  | 1.83      | 1.59   | -0.25  | -13.42%  | 0.0000  |
| Standard deviation                   | 1.39      | 1.30   |        |          |         | 1.41      | 1.32   |        |          |         |
| <b>Sugar (grams)**</b>               |           |        |        |          |         |           |        |        |          |         |
| Average per-serving                  | 0.74      | 0.74   | 0.00   | 0.00%    | 1.0000  | 0.72      |        |        |          |         |
| Standard deviation                   | 1.12      | 1.12   |        |          |         | 1.13      |        |        |          |         |
| <b>Sodium (milligrams)</b>           |           |        |        |          |         |           |        |        |          |         |
| Average per-serving                  | 223.29    | 223.38 | 0.09   | 0.04%    | 0.3851  | 227.79    | 227.89 | 0.11   | 0.05%    | 0.3804  |
| Standard deviation                   | 192.06    | 191.98 |        |          |         | 200.87    | 200.77 |        |          |         |
| <b>Dietary fiber (grams)</b>         |           |        |        |          |         |           |        |        |          |         |
| Average per-serving                  | 1.36      | 1.35   | -0.01  | -0.49%   | 0.0012  | 1.34      | 1.33   | -0.01  | -0.65%   | 0.0007  |
| Standard deviation                   | 0.92      | 0.92   |        |          |         | 0.94      | 0.94   |        |          |         |
| <b>No. of UPCs</b>                   | 1,225     |        |        |          |         | 1,057     |        |        |          |         |
| <b>Private Label UPCs</b>            |           |        |        |          |         |           |        |        |          |         |
| <b>Calories</b>                      |           |        |        |          |         |           |        |        |          |         |
| Average per-serving                  | 140.97    | 140.92 | -0.05  | -0.03%   | 0.0140  | 140.42    | 140.38 | -0.03  | -0.02%   | 0.0833  |
| Standard deviation                   | 14.21     | 14.26  |        |          |         | 13.94     | 13.95  |        |          |         |
| <b>Saturated fat (grams)</b>         |           |        |        |          |         |           |        |        |          |         |
| Average per-serving                  | 1.33      | 1.15   | -0.18  | -13.68%  | 0.0000  | 1.35      | 1.16   | -0.19  | -14.15%  | 0.0000  |
| Standard deviation                   | 1.11      | 0.99   |        |          |         | 1.13      | 0.99   |        |          |         |
| <b>Sugar (grams)**</b>               |           |        |        |          |         |           |        |        |          |         |
| Average per-serving                  | 0.76      | 0.76   | 0.00   | 0.00%    |         | 0.82      |        |        |          |         |
| Standard deviation                   | 1.53      | 1.53   |        |          |         | 1.66      |        |        |          |         |
| <b>Sodium (milligrams)</b>           |           |        |        |          |         |           |        |        |          |         |
| Average per-serving                  | 177.21    | 177.17 | -0.04  | -0.02%   | 0.0275  | 189.52    | 190.26 | 0.74   | 0.39%    | 0.0784  |
| Standard deviation                   | 143.81    | 143.81 |        |          |         | 152.10    | 151.58 |        |          |         |
| <b>Dietary fiber (grams)</b>         |           |        |        |          |         |           |        |        |          |         |
| Average per-serving                  | 1.32      | 1.31   | -0.01  | -0.75%   | 0.0251  | 1.26      | 1.27   | 0.01   | 0.89%    | 0.1579  |
| Standard deviation                   | 0.88      | 0.87   |        |          |         | 0.92      | 0.92   |        |          |         |
| <b>No. of UPCs</b>                   | 251       |        |        |          |         | 178       |        |        |          |         |

\*Serving = 28 grams

\*\*Sugar data is unavailable for 2015



## Types and Frequencies of Reformulation: **Yeast Breads**

Calculations using InfoScan Data for UPCs with positive sales

| Average per-serving nutrient values* | 2012-2014 |        |        |          |         | 2012-2015 |        |        |          |         |
|--------------------------------------|-----------|--------|--------|----------|---------|-----------|--------|--------|----------|---------|
|                                      | 2012      | 2014   | Change | % Change | p-value | 2012      | 2015   | Change | % Change | p-value |
| <b>All UPCs</b>                      |           |        |        |          |         |           |        |        |          |         |
| <b>Calories</b>                      |           |        |        |          |         |           |        |        |          |         |
| Average per-serving                  | 144.94    | 144.96 | 0.02   | 0.01%    | 0.3584  | 145.09    | 145.13 | 0.04   | 0.03%    | 0.1417  |
| Standard deviation                   | 20.33     | 20.31  |        |          |         | 20.35     | 20.32  |        |          |         |
| <b>Saturated fat (grams)</b>         |           |        |        |          |         |           |        |        |          |         |
| Average per-serving                  | 0.17      | 0.14   | -0.04  | -21.15%  | 0.0000  | 0.17      | 0.14   | -0.04  | -20.75%  | 0.0000  |
| Standard deviation                   | 0.69      | 0.63   |        |          |         | 0.70      | 0.64   |        |          |         |
| <b>Sugar (grams)**</b>               |           |        |        |          |         |           |        |        |          |         |
| Average per-serving                  | 3.04      | 3.04   | 0.00   | -0.02%   | 0.6875  | 3.01      |        |        |          |         |
| Standard deviation                   | 2.72      | 2.72   |        |          |         | 2.73      |        |        |          |         |
| <b>Sodium (milligrams)</b>           |           |        |        |          |         |           |        |        |          |         |
| Average per-serving                  | 281.08    | 281.03 | -0.04  | -0.02%   | 0.3010  | 281.74    | 281.70 | -0.04  | -0.01%   | 0.4602  |
| Standard deviation                   | 68.44     | 68.41  |        |          |         | 69.40     | 69.39  |        |          |         |
| <b>Dietary fiber (grams)</b>         |           |        |        |          |         |           |        |        |          |         |
| Average per-serving                  | 2.37      | 2.37   | 0.00   | -0.17%   | 0.0088  | 2.37      | 2.37   | -0.01  | -0.21%   | 0.0143  |
| Standard deviation                   | 1.86      | 1.86   |        |          |         | 1.86      | 1.86   |        |          |         |
| <b>No. of UPCs</b>                   | 2,683     |        |        |          |         | 2,473     |        |        |          |         |
| <b>Branded UPCs</b>                  |           |        |        |          |         |           |        |        |          |         |
| <b>Calories</b>                      |           |        |        |          |         |           |        |        |          |         |
| Average per-serving                  | 144.31    | 144.34 | 0.03   | 0.02%    | 0.1526  | 144.53    | 144.57 | 0.04   | 0.03%    | 0.0945  |
| Standard deviation                   | 21.44     | 21.43  |        |          |         | 21.33     | 21.32  |        |          |         |
| <b>Saturated fat (grams)</b>         |           |        |        |          |         |           |        |        |          |         |
| Average per-serving                  | 0.18      | 0.14   | -0.04  | -20.00%  | 0.0000  | 0.17      | 0.14   | -0.03  | -19.49%  | 0.0000  |
| Standard deviation                   | 0.63      | 0.56   |        |          |         | 0.63      | 0.57   |        |          |         |
| <b>Sugar (grams)**</b>               |           |        |        |          |         |           |        |        |          |         |
| Average per-serving                  | 3.08      | 3.08   | 0.00   | -0.03%   | 0.4633  | 3.04      |        |        |          |         |
| Standard deviation                   | 2.71      | 2.71   |        |          |         | 2.69      |        |        |          |         |
| <b>Sodium (milligrams)</b>           |           |        |        |          |         |           |        |        |          |         |
| Average per-serving                  | 273.88    | 273.88 | -0.01  | 0.00%    | 0.9220  | 274.88    | 274.89 | 0.01   | 0.00%    | 0.8236  |
| Standard deviation                   | 73.18     | 73.14  |        |          |         | 73.95     | 73.90  |        |          |         |
| <b>Dietary fiber (grams)</b>         |           |        |        |          |         |           |        |        |          |         |
| Average per-serving                  | 2.58      | 2.58   | -0.01  | -0.20%   | 0.0144  | 2.57      | 2.57   | 0.00   | -0.19%   | 0.0380  |
| Standard deviation                   | 1.94      | 1.94   |        |          |         | 1.92      | 1.92   |        |          |         |
| <b>No. of UPCs</b>                   | 1,680     |        |        |          |         | 1,562     |        |        |          |         |
| <b>Private Label UPCs</b>            |           |        |        |          |         |           |        |        |          |         |
| <b>Calories</b>                      |           |        |        |          |         |           |        |        |          |         |
| Average per-serving                  | 146.01    | 146.01 | 0.00   | 0.00%    | 0.9823  | 146.05    | 146.09 | 0.03   | 0.02%    | 0.5596  |
| Standard deviation                   | 18.29     | 18.24  |        |          |         | 18.52     | 18.47  |        |          |         |
| <b>Saturated fat (grams)</b>         |           |        |        |          |         |           |        |        |          |         |
| Average per-serving                  | 0.16      | 0.13   | -0.04  | -23.21%  | 0.0000  | 0.17      | 0.13   | -0.04  | -22.97%  | 0.0000  |
| Standard deviation                   | 0.79      | 0.73   |        |          |         | 0.82      | 0.76   |        |          |         |
| <b>Sugar (grams)**</b>               |           |        |        |          |         |           |        |        |          |         |
| Average per-serving                  | 2.96      | 2.96   | 0.00   | 0.00%    | 1.0000  | 2.95      |        |        |          |         |
| Standard deviation                   | 2.74      | 2.73   |        |          |         | 2.78      |        |        |          |         |
| <b>Sodium (milligrams)</b>           |           |        |        |          |         |           |        |        |          |         |
| Average per-serving                  | 293.12    | 293.01 | -0.11  | -0.04%   | 0.1081  | 293.49    | 293.36 | -0.13  | -0.05%   | 0.2157  |
| Standard deviation                   | 57.73     | 57.75  |        |          |         | 59.04     | 59.15  |        |          |         |
| <b>Dietary fiber (grams)</b>         |           |        |        |          |         |           |        |        |          |         |
| Average per-serving                  | 2.02      | 2.01   | 0.00   | -0.10%   | 0.3176  | 2.03      | 2.03   | -0.01  | -0.27%   | 0.1656  |
| Standard deviation                   | 1.65      | 1.65   |        |          |         | 1.69      | 1.69   |        |          |         |
| <b>No. of UPCs</b>                   | 1,003     |        |        |          |         | 910       |        |        |          |         |

\*Serving = 57 grams

\*\*Sugar data is unavailable for 2015

## Types and Frequencies of Reformulation: Yogurt

Calculations using InfoScan Data for UPCs with positive sales

| Average per-serving nutrient values* | 2012-2014 |        |        |          |         | 2012-2015 |        |        |          |         |
|--------------------------------------|-----------|--------|--------|----------|---------|-----------|--------|--------|----------|---------|
|                                      | 2012      | 2014   | Change | % Change | p-value | 2012      | 2015   | Change | % Change | p-value |
| <b>All UPCs</b>                      |           |        |        |          |         |           |        |        |          |         |
| <b>Calories</b>                      |           |        |        |          |         |           |        |        |          |         |
| Average per-serving                  | 137.06    | 137.27 | 0.21   | 0.15%    | 0.0203  | 137.45    | 137.64 | 0.19   | 0.14%    | 0.2313  |
| Standard deviation                   | 42.60     | 42.56  |        |          |         | 43.88     | 44.02  |        |          |         |
| <b>Saturated fat (grams)</b>         |           |        |        |          |         |           |        |        |          |         |
| Average per-serving                  | 1.09      | 1.02   | -0.07  | -6.09%   | 0.0000  | 1.16      | 1.09   | -0.07  | -6.11%   | 0.0000  |
| Standard deviation                   | 1.80      | 1.75   |        |          |         | 1.87      | 1.82   |        |          |         |
| <b>Sugar (grams)**</b>               |           |        |        |          |         |           |        |        |          |         |
| Average per-serving                  | 18.93     | 18.95  | 0.02   | 0.09%    | 0.3062  | 18.91     |        |        |          |         |
| Standard deviation                   | 8.33      | 8.35   |        |          |         | 8.51      |        |        |          |         |
| <b>Sodium (milligrams)</b>           |           |        |        |          |         |           |        |        |          |         |
| Average per-serving                  | 96.94     | 97.00  | 0.06   | 0.06%    | 0.0769  | 97.28     | 97.39  | 0.11   | 0.11%    | 0.0415  |
| Standard deviation                   | 24.23     | 24.26  |        |          |         | 24.96     | 24.98  |        |          |         |
| <b>Dietary fiber (grams)</b>         |           |        |        |          |         |           |        |        |          |         |
| Average per-serving                  | 0.31      | 0.32   | 0.01   | 3.22%    | 0.0005  | 0.30      | 0.31   | 0.01   | 3.63%    | 0.0016  |
| Standard deviation                   | 0.76      | 0.77   |        |          |         | 0.76      | 0.76   |        |          |         |
| <b>No. of UPCs</b>                   | 1,385     |        |        |          |         | 1,183     |        |        |          |         |
| <b>Branded UPCs</b>                  |           |        |        |          |         |           |        |        |          |         |
| <b>Calories</b>                      |           |        |        |          |         |           |        |        |          |         |
| Average per-serving                  | 144.06    | 144.41 | 0.35   | 0.25%    | 0.0203  | 144.60    | 144.83 | 0.23   | 0.16%    | 0.3551  |
| Standard deviation                   | 42.71     | 42.59  |        |          |         | 44.15     | 44.31  |        |          |         |
| <b>Saturated fat (grams)</b>         |           |        |        |          |         |           |        |        |          |         |
| Average per-serving                  | 1.46      | 1.38   | -0.08  | -5.41%   | 0.0000  | 1.55      | 1.47   | -0.08  | -5.41%   | 0.0000  |
| Standard deviation                   | 2.19      | 2.14   |        |          |         | 2.28      | 2.23   |        |          |         |
| <b>Sugar (grams)**</b>               |           |        |        |          |         |           |        |        |          |         |
| Average per-serving                  | 19.59     | 19.62  | 0.03   | 0.14%    | 0.3064  | 19.48     |        |        |          |         |
| Standard deviation                   | 7.80      | 7.83   |        |          |         | 8.04      |        |        |          |         |
| <b>Sodium (milligrams)</b>           |           |        |        |          |         |           |        |        |          |         |
| Average per-serving                  | 94.06     | 94.17  | 0.10   | 0.11%    | 0.0769  | 93.84     | 93.97  | 0.13   | 0.14%    | 0.0738  |
| Standard deviation                   | 24.19     | 24.25  |        |          |         | 25.10     | 25.19  |        |          |         |
| <b>Dietary fiber (grams)</b>         |           |        |        |          |         |           |        |        |          |         |
| Average per-serving                  | 0.30      | 0.32   | 0.02   | 5.67%    | 0.0004  | 0.29      | 0.31   | 0.02   | 6.40%    | 0.0016  |
| Standard deviation                   | 0.79      | 0.79   |        |          |         | 0.75      | 0.76   |        |          |         |
| <b>No. of UPCs</b>                   | 817       |        |        |          |         | 701       |        |        |          |         |
| <b>Private Label UPCs</b>            |           |        |        |          |         |           |        |        |          |         |
| <b>Calories</b>                      |           |        |        |          |         |           |        |        |          |         |
| Average per-serving                  | 127.00    | 127.00 | 0.00   | 0.00%    |         | 127.06    | 127.18 | 0.12   | 0.10%    | 0.3178  |
| Standard deviation                   | 40.41     | 40.41  |        |          |         | 41.39     | 41.46  |        |          |         |
| <b>Saturated fat (grams)</b>         |           |        |        |          |         |           |        |        |          |         |
| Average per-serving                  | 0.54      | 0.49   | -0.05  | -8.73%   | 0.0000  | 0.60      | 0.55   | -0.05  | -8.75%   | 0.0000  |
| Standard deviation                   | 0.72      | 0.63   |        |          |         | 0.74      | 0.64   |        |          |         |
| <b>Sugar (grams)**</b>               |           |        |        |          |         |           |        |        |          |         |
| Average per-serving                  | 17.99     | 17.99  | 0.00   | 0.00%    |         | 18.09     |        |        |          |         |
| Standard deviation                   | 8.96      | 8.96   |        |          |         | 9.10      |        |        |          |         |
| <b>Sodium (milligrams)</b>           |           |        |        |          |         |           |        |        |          |         |
| Average per-serving                  | 101.07    | 101.07 | 0.00   | 0.00%    |         | 102.29    | 102.37 | 0.08   | 0.08%    | 0.3178  |
| Standard deviation                   | 23.70     | 23.70  |        |          |         | 23.91     | 23.83  |        |          |         |
| <b>Dietary fiber (grams)</b>         |           |        |        |          |         |           |        |        |          |         |
| Average per-serving                  | 0.33      | 0.33   | 0.00   | 0.00%    |         | 0.32      | 0.32   | 0.00   | 0.00%    |         |
| Standard deviation                   | 0.73      | 0.73   |        |          |         | 0.76      | 0.76   |        |          |         |
| <b>No. of UPCs</b>                   | 568       |        |        |          |         | 482       |        |        |          |         |

\*Serving = 170 grams

\*\*Sugar data is unavailable for 2015
