# Supplementary material for: How Much Can Product Reformulation Improve Diet Quality in Households with Children and Adolescents?
Source: MDPI journal article supplement (doi:10.3390/nu11030618), 2019-03-14
Supplement: s1 [file s1]

## Products

- 1 [Cereal Bars](#)
- 2 [Cookies](#)
- 3 [Crackers](#)
- 4 [Frankfurters](#)
- 5 [Fruit Drinks](#)
- 6 [Ice Cream](#)
- 7 [Lunch Combinations](#)
- 8 [Macaroni & Cheese \(RTE\)](#)
- 9 [Macaroni & Cheese \(Mixes\)](#)
- 10 [Nut Butters](#)
- 11 [Pizza](#)
- 12 [Potato Chips](#)
- 13 [RTE Cereal](#)
- 14 [Soft Drinks](#)
- 15 [Tortilla Chips](#)
- 16 [Yeast Breads](#)
- 17 [Yogurt](#)

## Types and Frequencies of Reformulation: Cereal Bars

Calculations using InfoScan Data for UPCs with positive sales

|                                      | 2014     |               |            |              |         |
|--------------------------------------|----------|---------------|------------|--------------|---------|
| Average per-serving nutrient values* | National | Private Label | Difference | % Difference | p-value |
| <b>All UPCs</b>                      |          |               |            |              |         |
| <b>Calories</b>                      |          |               |            |              |         |
| Average per-serving                  | 142.73   | 144.13        | 1.40       | 0.97%        | 0.1969  |
| Standard deviation                   | 18.83    | 17.43         |            |              |         |
| <b>Saturated fat (grams)</b>         |          |               |            |              |         |
| Average per-serving                  | 1.96     | 1.41          | -0.55      | -32.46%      | 0.0000  |
| Standard deviation                   | 1.28     | 1.54          |            |              |         |
| <b>Sugar (grams)</b>                 |          |               |            |              |         |
| Average per-serving                  | 9.17     | 10.52         | 1.35       | 13.70%       | 0.0000  |
| Standard deviation                   | 4.04     | 2.17          |            |              |         |
| <b>Sodium (milligrams)</b>           |          |               |            |              |         |
| Average per-serving                  | 105.22   | 97.88         | -7.33      | -7.22%       | 0.0074  |
| Standard deviation                   | 49.22    | 32.03         |            |              |         |
| <b>Dietary fiber (grams)</b>         |          |               |            |              |         |
| Average per-serving                  | 2.64     | 2.36          | -0.28      | -11.19%      | 0.0185  |
| Standard deviation                   | 2.06     | 1.98          |            |              |         |
| <b>No. of UPCs</b>                   | 2,112    | 346           |            |              |         |

\*Serving = 35 grams

## Types and Frequencies of Reformulation: Cookies and Brownies

Calculations using InfoScan Data for UPCs with positive sales

|                                      | 2014     |               |            |              |         |
|--------------------------------------|----------|---------------|------------|--------------|---------|
| Average per-serving nutrient values* | National | Private Label | Difference | % Difference | p-value |
| <b>All UPCs</b>                      |          |               |            |              |         |
| <b>Calories</b>                      |          |               |            |              |         |
| Average per-serving                  | 136.39   | 136.05        | -0.34      | -0.25%       | 0.5680  |
| Standard deviation                   | 19.03    | 16.78         |            |              |         |
| <b>Saturated fat (grams)</b>         |          |               |            |              |         |
| Average per-serving                  | 2.42     | 2.32          | -0.09      | -3.98%       | 0.0562  |
| Standard deviation                   | 1.56     | 1.44          |            |              |         |
| <b>Sugar (grams)</b>                 |          |               |            |              |         |
| Average per-serving                  | 9.77     | 10.21         | 0.44       | 4.39%        | 0.0000  |
| Standard deviation                   | 3.38     | 2.80          |            |              |         |
| <b>Sodium (milligrams)</b>           |          |               |            |              |         |
| Average per-serving                  | 88.61    | 99.66         | 11.05      | 11.74%       | 0.0000  |
| Standard deviation                   | 38.29    | 37.11         |            |              |         |
| <b>Dietary fiber (grams)</b>         |          |               |            |              |         |
| Average per-serving                  | 0.78     | 0.58          | -0.20      | -29.06%      | 0.0000  |
| Standard deviation                   | 0.87     | 0.71          |            |              |         |
| <b>No. of UPCs</b>                   | 3,269    | 1,344         |            |              |         |

\*Serving = 30 grams

## Types and Frequencies of Reformulation: Crackers

Calculations using InfoScan Data for UPCs with positive sales

|                                      | 2014         |               |            |              |         |
|--------------------------------------|--------------|---------------|------------|--------------|---------|
| Average per-serving nutrient values* | National     | Private Label | Difference | % Difference | p-value |
| <b>All UPCs</b>                      |              |               |            |              |         |
| <b>Calories</b>                      |              |               |            |              |         |
| Average per-serving                  | 131.34       | 131.47        | 0.13       | 0.10%        | 0.8782  |
| Standard deviation                   | 18.46        | 17.05         |            |              |         |
| <b>Saturated fat (grams)</b>         |              |               |            |              |         |
| Average per-serving                  | 0.99         | 0.78          | -0.22      | -24.51%      | 0.0000  |
| Standard deviation                   | 1.18         | 0.89          |            |              |         |
| <b>Sugar (grams)</b>                 |              |               |            |              |         |
| Average per-serving                  | 2.01         | 2.66          | 0.65       | 27.79%       | 0.0000  |
| Standard deviation                   | 2.41         | 3.03          |            |              |         |
| <b>Sodium (milligrams)</b>           |              |               |            |              |         |
| Average per-serving                  | 207.59       | 214.35        | 6.76       | 3.20%        | 0.1581  |
| Standard deviation                   | 99.33        | 106.30        |            |              |         |
| <b>Dietary fiber (grams)</b>         |              |               |            |              |         |
| Average per-serving                  | 1.37         | 1.00          | -0.37      | -31.04%      | 0.0000  |
| Standard deviation                   | 1.17         | 0.98          |            |              |         |
| <b>No. of UPCs</b>                   | <b>1,901</b> | <b>582</b>    |            |              |         |

\*Serving = 30 grams

## Types and Frequencies of Reformulation: **Frankfurters**

Calculations using InfoScan Data for UPCs with positive sales

|                                      | 2014     |               |            |              |         |
|--------------------------------------|----------|---------------|------------|--------------|---------|
| Average per-serving nutrient values* | National | Private Label | Difference | % Difference | p-value |
| <b>All UPCs</b>                      |          |               |            |              |         |
| <b>Calories</b>                      |          |               |            |              |         |
| Average per-serving                  | 156.42   | 168.09        | 11.67      | 7.19%        | 0.0002  |
| Standard deviation                   | 28.42    | 19.47         |            |              |         |
| <b>Saturated fat (grams)</b>         |          |               |            |              |         |
| Average per-serving                  | 4.83     | 5.20          | 0.38       | 7.53%        | 0.0220  |
| Standard deviation                   | 1.46     | 1.15          |            |              |         |
| <b>Sugar (grams)</b>                 |          |               |            |              |         |
| Average per-serving                  | 1.03     | 1.49          | 0.46       | 36.73%       | 0.0001  |
| Standard deviation                   | 0.98     | 1.32          |            |              |         |
| <b>Sodium (milligrams)</b>           |          |               |            |              |         |
| Average per-serving                  | 532.70   | 570.98        | 38.28      | 6.94%        | 0.0012  |
| Standard deviation                   | 100.05   | 115.80        |            |              |         |
| <b>Dietary fiber (grams)</b>         |          |               |            |              |         |
| Average per-serving                  | 0.05     | 0.00          | -0.05      | -200.00%     | 0.1217  |
| Standard deviation                   | 0.27     | 0.00          |            |              |         |
| <b>No. of UPCs</b>                   | 604      | 86            |            |              |         |

\*Serving = 56 grams

## Types and Frequencies of Reformulation: **Fruit Drinks**

Calculations using InfoScan Data for UPCs with positive sales

|                                      | 2014     |               |            |              |         |
|--------------------------------------|----------|---------------|------------|--------------|---------|
| Average per-serving nutrient values* | National | Private Label | Difference | % Difference | p-value |
| <b>All UPCs</b>                      |          |               |            |              |         |
| <b>Calories</b>                      |          |               |            |              |         |
| Average per-serving                  | 92.89    | 101.68        | 8.79       | 9.04%        | 0.0000  |
| Standard deviation                   | 41.00    | 40.82         |            |              |         |
| <b>Saturated fat (grams)</b>         |          |               |            |              |         |
| Average per-serving                  |          |               |            |              |         |
| Standard deviation                   |          |               |            |              |         |
| <b>Sugar (grams)</b>                 |          |               |            |              |         |
| Average per-serving                  | 21.82    | 25.07         | 3.25       | 13.87%       | 0.0000  |
| Standard deviation                   | 9.92     | 10.15         |            |              |         |
| <b>Sodium (milligrams)</b>           |          |               |            |              |         |
| Average per-serving                  | 32.59    | 39.71         | 7.12       | 19.69%       | 0.0000  |
| Standard deviation                   | 37.92    | 26.60         |            |              |         |
| <b>Dietary fiber (grams)</b>         |          |               |            |              |         |
| Average per-serving                  |          |               |            |              |         |
| Standard deviation                   |          |               |            |              |         |
| <b>No. of UPCs</b>                   | 2,059    | 630           |            |              |         |

\*Serving = 240 grams (8 oz)

## Types and Frequencies of Reformulation: Ice Cream

Calculations using InfoScan Data for UPCs with positive sales

|                                      | 2014     |               |            |              |         |
|--------------------------------------|----------|---------------|------------|--------------|---------|
| Average per-serving nutrient values* | National | Private Label | Difference | % Difference | p-value |
| <b>All UPCs</b>                      |          |               |            |              |         |
| <b>Calories</b>                      |          |               |            |              |         |
| Average per-serving                  | 141.48   | 137.84        | -3.64      | -2.61%       | 0.0014  |
| Standard deviation                   | 40.83    | 35.06         |            |              |         |
| <b>Saturated fat (grams)</b>         |          |               |            |              |         |
| Average per-serving                  | 3.98     | 3.84          | -0.14      | -3.54%       | 0.0412  |
| Standard deviation                   | 2.43     | 2.09          |            |              |         |
| <b>Sugar (grams)</b>                 |          |               |            |              |         |
| Average per-serving                  | 13.77    | 13.92         | 0.15       | 1.11%        | 0.1030  |
| Standard deviation                   | 3.34     | 2.98          |            |              |         |
| <b>Sodium (milligrams)</b>           |          |               |            |              |         |
| Average per-serving                  | 57.24    | 59.20         | 1.96       | 3.37%        | 0.0340  |
| Standard deviation                   | 32.45    | 30.08         |            |              |         |
| <b>Dietary fiber (grams)</b>         |          |               |            |              |         |
| Average per-serving                  | 0.63     | 0.32          | -0.31      | -64.80%      | 0.0000  |
| Standard deviation                   | 1.03     | 0.64          |            |              |         |
| <b>No. of UPCs</b>                   | 3,345    | 1,802         |            |              |         |

\*Serving = 65 grams

## Types and Frequencies of Reformulation: Lunch Combinations

Calculations using InfoScan Data for UPCs with positive sales

2014

| Average per-serving nutrient values* | National | Private Label | Difference | % Difference | p-value |
|--------------------------------------|----------|---------------|------------|--------------|---------|
|--------------------------------------|----------|---------------|------------|--------------|---------|

### All UPCs

#### Calories

Average per-serving

Standard deviation

No private label products

#### Saturated fat (grams)

Average per-serving

Standard deviation

#### Sugar (grams)

Average per-serving

Standard deviation

#### Sodium (milligrams)

Average per-serving

Standard deviation

#### Dietary fiber (grams)

Average per-serving

Standard deviation

### No. of UPCs

\*Serving = 128 grams



## Types and Frequencies of Reformulation: Macaroni & Cheese (RTE)

Calculations using InfoScan Data for UPCs with positive sales

|                                      | 2014     |               |            |              |         |
|--------------------------------------|----------|---------------|------------|--------------|---------|
| Average per-serving nutrient values* | National | Private Label | Difference | % Difference | p-value |
| <b>All UPCs</b>                      |          |               |            |              |         |
| <b>Calories</b>                      |          |               |            |              |         |
| Average per-serving                  | 334.99   | 360.43        | 25.44      | 7.32%        | 0.2202  |
| Standard deviation                   | 68.09    | 79.97         |            |              |         |
| <b>Saturated fat (grams)</b>         |          |               |            |              |         |
| Average per-serving                  | 7.06     | 9.50          | 2.44       | 29.51%       | 0.0424  |
| Standard deviation                   | 3.80     | 5.06          |            |              |         |
| <b>Sugar (grams)</b>                 |          |               |            |              |         |
| Average per-serving                  | 4.28     | 4.71          | 0.43       | 9.67%        | 0.4798  |
| Standard deviation                   | 2.06     | 2.23          |            |              |         |
| <b>Sodium (milligrams)</b>           |          |               |            |              |         |
| Average per-serving                  | 733.15   | 821.93        | 88.78      | 11.42%       | 0.1654  |
| Standard deviation                   | 218.16   | 205.20        |            |              |         |
| <b>Dietary fiber (grams)</b>         |          |               |            |              |         |
| Average per-serving                  | 2.24     | 1.79          | -0.45      | -22.36%      | 0.1923  |
| Standard deviation                   | 1.22     | 0.80          |            |              |         |
| <b>No. of UPCs</b>                   | 68       | 14            |            |              |         |

\*Serving =227 grams

## Types and Frequencies of Reformulation: Macaroni and Cheese (Mixes)

Calculations using InfoScan Data for UPCs with positive sales

|                                      | 2014     |               |            |              |         |
|--------------------------------------|----------|---------------|------------|--------------|---------|
| Average per-serving nutrient values* | National | Private Label | Difference | % Difference | p-value |
| <b>All UPCs</b>                      |          |               |            |              |         |
| <b>Calories</b>                      |          |               |            |              |         |
| Average per-serving                  | 245.92   | 244.68        | -1.24      | -0.50%       | 0.6123  |
| Standard deviation                   | 30.77    | 17.49         |            |              |         |
| <b>Saturated fat (grams)</b>         |          |               |            |              |         |
| Average per-serving                  | 1.88     | 1.64          | -0.24      | -13.76%      | 0.0400  |
| Standard deviation                   | 0.99     | 1.35          |            |              |         |
| <b>Sugar (grams)</b>                 |          |               |            |              |         |
| Average per-serving                  | 5.04     | 4.39          | -0.64      | -13.62%      | 0.0036  |
| Standard deviation                   | 2.01     | 2.39          |            |              |         |
| <b>Sodium (milligrams)</b>           |          |               |            |              |         |
| Average per-serving                  | 572.18   | 604.93        | 32.75      | 5.56%        | 0.0005  |
| Standard deviation                   | 104.47   | 84.68         |            |              |         |
| <b>Dietary fiber (grams)</b>         |          |               |            |              |         |
| Average per-serving                  | 1.65     | 1.56          | -0.09      | -5.38%       | 0.3069  |
| Standard deviation                   | 1.08     | 0.58          |            |              |         |
| <b>No. of UPCs</b>                   | 195      | 216           |            |              |         |

\*Serving = 70 grams

## Types and Frequencies of Reformulation: **Nut Butters**

Calculations using InfoScan Data for UPCs with positive sales

|                                      | 2014     |               |            |              |         |
|--------------------------------------|----------|---------------|------------|--------------|---------|
| Average per-serving nutrient values* | National | Private Label | Difference | % Difference | p-value |
| <b>All UPCs</b>                      |          |               |            |              |         |
| <b>Calories</b>                      |          |               |            |              |         |
| Average per-serving                  | 186.16   | 190.07        | 3.91       | 2.08%        | 0.0080  |
| Standard deviation                   | 21.98    | 16.22         |            |              |         |
| <b>Saturated fat (grams)</b>         |          |               |            |              |         |
| Average per-serving                  | 2.47     | 2.89          | 0.42       | 15.58%       | 0.0000  |
| Standard deviation                   | 0.83     | 0.73          |            |              |         |
| <b>Sugar (grams)</b>                 |          |               |            |              |         |
| Average per-serving                  | 4.03     | 3.88          | -0.16      | -3.94%       | 0.5928  |
| Standard deviation                   | 4.04     | 3.71          |            |              |         |
| <b>Sodium (milligrams)</b>           |          |               |            |              |         |
| Average per-serving                  | 88.58    | 116.08        | 27.49      | 26.87%       | 0.0000  |
| Standard deviation                   | 56.88    | 47.62         |            |              |         |
| <b>Dietary fiber (grams)</b>         |          |               |            |              |         |
| Average per-serving                  | 2.25     | 2.00          | -0.25      | -11.87%      | 0.0000  |
| Standard deviation                   | 0.89     | 0.64          |            |              |         |
| <b>No. of UPCs</b>                   | 406      | 319           |            |              |         |

\*Serving = 32 grams

## Types and Frequencies of Reformulation: **Pizza**

Calculations using InfoScan Data for UPCs with positive sales

|                                      | 2014       |               |            |              |         |
|--------------------------------------|------------|---------------|------------|--------------|---------|
| Average per-serving nutrient values* | National   | Private Label | Difference | % Difference | p-value |
| <b>All UPCs</b>                      |            |               |            |              |         |
| <b>Calories</b>                      |            |               |            |              |         |
| Average per-serving                  | 340.77     | 330.37        | -10.40     | -3.10%       | 0.0000  |
| Standard deviation                   | 42.56      | 34.70         |            |              |         |
| <b>Saturated fat (grams)</b>         |            |               |            |              |         |
| Average per-serving                  | 6.11       | 5.52          | -0.59      | -10.15%      | 0.0000  |
| Standard deviation                   | 2.02       | 2.06          |            |              |         |
| <b>Sugar (grams)</b>                 |            |               |            |              |         |
| Average per-serving                  | 4.46       | 3.69          | -0.77      | -18.78%      | 0.0000  |
| Standard deviation                   | 2.73       | 2.24          |            |              |         |
| <b>Sodium (milligrams)</b>           |            |               |            |              |         |
| Average per-serving                  | 733.87     | 733.05        | -0.82      | -0.11%       | 0.9289  |
| Standard deviation                   | 173.15     | 164.39        |            |              |         |
| <b>Dietary fiber (grams)</b>         |            |               |            |              |         |
| Average per-serving                  | 2.38       | 2.05          | -0.33      | -15.07%      | 0.0000  |
| Standard deviation                   | 1.29       | 0.75          |            |              |         |
| <b>No. of UPCs</b>                   | <b>937</b> | <b>538</b>    |            |              |         |

\*Serving = 142 grams

## Types and Frequencies of Reformulation: **Potato Chips**

Calculations using InfoScan Data for UPCs with positive sales

|                                      | 2014     |               |            |              |         |
|--------------------------------------|----------|---------------|------------|--------------|---------|
| Average per-serving nutrient values* | National | Private Label | Difference | % Difference | p-value |
| <b>All UPCs</b>                      |          |               |            |              |         |
| <b>Calories</b>                      |          |               |            |              |         |
| Average per-serving                  | 149.64   | 151.04        | 1.40       | 0.93%        | 0.0516  |
| Standard deviation                   | 12.20    | 10.78         |            |              |         |
| <b>Saturated fat (grams)</b>         |          |               |            |              |         |
| Average per-serving                  | 1.76     | 1.84          | 0.08       | 4.33%        | 0.1248  |
| Standard deviation                   | 0.84     | 0.89          |            |              |         |
| <b>Sugar (grams)</b>                 |          |               |            |              |         |
| Average per-serving                  | 0.89     | 0.71          | -0.18      | -22.10%      | 0.0008  |
| Standard deviation                   | 0.91     | 0.72          |            |              |         |
| <b>Sodium (milligrams)</b>           |          |               |            |              |         |
| Average per-serving                  | 192.68   | 194.62        | 1.94       | 1.00%        | 0.6998  |
| Standard deviation                   | 85.15    | 78.79         |            |              |         |
| <b>Dietary fiber (grams)</b>         |          |               |            |              |         |
| Average per-serving                  | 1.04     | 0.98          | -0.06      | -5.69%       | 0.0022  |
| Standard deviation                   | 0.29     | 0.39          |            |              |         |
| <b>No. of UPCs</b>                   | 1,643    | 336           |            |              |         |

\*Serving = 28 grams

## Types and Frequencies of Reformulation: RTE Cereal

Calculations using InfoScan Data for UPCs with positive sales

|                                      | 2014     |               |            |              |         |
|--------------------------------------|----------|---------------|------------|--------------|---------|
| Average per-serving nutrient values* | National | Private Label | Difference | % Difference | p-value |
| <b>All UPCs</b>                      |          |               |            |              |         |
| <b>Calories</b>                      |          |               |            |              |         |
| Average per-serving                  | 116.18   | 113.70        | -2.48      | -2.16%       | 0.0000  |
| Standard deviation                   | 12.13    | 11.22         |            |              |         |
| <b>Saturated fat (grams)</b>         |          |               |            |              |         |
| Average per-serving                  | 0.28     | 0.08          | -0.19      | -108.41%     | 0.0000  |
| Standard deviation                   | 0.49     | 0.27          |            |              |         |
| <b>Sugar (grams)</b>                 |          |               |            |              |         |
| Average per-serving                  | 8.09     | 7.87          | -0.22      | -2.72%       | 0.1585  |
| Standard deviation                   | 3.74     | 4.33          |            |              |         |
| <b>Sodium (milligrams)</b>           |          |               |            |              |         |
| Average per-serving                  | 119.20   | 150.33        | 31.13      | 23.10%       | 0.0000  |
| Standard deviation                   | 72.31    | 72.65         |            |              |         |
| <b>Dietary fiber (grams)</b>         |          |               |            |              |         |
| Average per-serving                  | 2.17     | 1.89          | -0.28      | -13.63%      | 0.0000  |
| Standard deviation                   | 1.52     | 1.74          |            |              |         |
| <b>No. of UPCs</b>                   | 1,500    | 1,243         |            |              |         |

\*Serving = 30 grams

## Types and Frequencies of Reformulation: **Soft Drinks**

Calculations using InfoScan Data for UPCs with positive sales

|                                      | 2014     |               |            |              |         |
|--------------------------------------|----------|---------------|------------|--------------|---------|
| Average per-serving nutrient values* | National | Private Label | Difference | % Difference | p-value |
| <b>All UPCs</b>                      |          |               |            |              |         |
| <b>Calories</b>                      |          |               |            |              |         |
| Average per-serving                  | 108.83   | 113.71        | 4.88       | 4.39%        | 0.0000  |
| Standard deviation                   | 24.19    | 20.94         |            |              |         |
| <b>Saturated fat (grams)</b>         |          |               |            |              |         |
| Average per-serving                  |          |               |            |              |         |
| Standard deviation                   |          |               |            |              |         |
| <b>Sugar (grams)</b>                 |          |               |            |              |         |
| Average per-serving                  | 28.12    | 29.35         | 1.24       | 4.30%        | 0.0000  |
| Standard deviation                   | 6.52     | 5.51          |            |              |         |
| <b>Sodium (milligrams)</b>           |          |               |            |              |         |
| Average per-serving                  | 29.62    | 21.09         | -8.53      | -33.62%      | 0.0000  |
| Standard deviation                   | 16.81    | 14.75         |            |              |         |
| <b>Dietary fiber (grams)</b>         |          |               |            |              |         |
| Average per-serving                  |          |               |            |              |         |
| Standard deviation                   |          |               |            |              |         |
| <b>No. of UPCs</b>                   | 1,844    | 667           |            |              |         |

\*Serving = 240 grams (8 oz)

## Types and Frequencies of Reformulation: Tortilla & Other Chips

Calculations using InfoScan Data for UPCs with positive sales

|                                      | 2014         |               |            |              |         |
|--------------------------------------|--------------|---------------|------------|--------------|---------|
| Average per-serving nutrient values* | National     | Private Label | Difference | % Difference | p-value |
| <b>All UPCs</b>                      |              |               |            |              |         |
| <b>Calories</b>                      |              |               |            |              |         |
| Average per-serving                  | 141.49       | 141.11        | -0.38      | -0.27%       | 0.7032  |
| Standard deviation                   | 16.44        | 15.37         |            |              |         |
| <b>Saturated fat (grams)</b>         |              |               |            |              |         |
| Average per-serving                  | 1.52         | 1.13          | -0.38      | -28.84%      | 0.0000  |
| Standard deviation                   | 1.27         | 0.96          |            |              |         |
| <b>Sugar (grams)</b>                 |              |               |            |              |         |
| Average per-serving                  | 0.76         | 0.70          | -0.07      | -9.26%       | 0.3447  |
| Standard deviation                   | 1.10         | 1.40          |            |              |         |
| <b>Sodium (milligrams)</b>           |              |               |            |              |         |
| Average per-serving                  | 220.86       | 171.92        | -48.94     | -24.92%      | 0.0000  |
| Standard deviation                   | 186.26       | 134.44        |            |              |         |
| <b>Dietary fiber (grams)</b>         |              |               |            |              |         |
| Average per-serving                  | 1.34         | 1.33          | -0.01      | -0.99%       | 0.8110  |
| Standard deviation                   | 0.91         | 0.83          |            |              |         |
| <b>No. of UPCs</b>                   | <b>1,593</b> | <b>315</b>    |            |              |         |

\*Serving = 28 grams



## Types and Frequencies of Reformulation: Yeast Breads

Calculations using InfoScan Data for UPCs with positive sales

|                                      | 2014     |               |            |              |         |
|--------------------------------------|----------|---------------|------------|--------------|---------|
| Average per-serving nutrient values* | National | Private Label | Difference | % Difference | p-value |
| <b>All UPCs</b>                      |          |               |            |              |         |
| <b>Calories</b>                      |          |               |            |              |         |
| Average per-serving                  | 144.12   | 146.17        | 2.05       | 1.41%        | 0.0085  |
| Standard deviation                   | 22.09    | 18.56         |            |              |         |
| <b>Saturated fat (grams)</b>         |          |               |            |              |         |
| Average per-serving                  | 0.15     | 0.13          | -0.02      | -13.60%      | 0.4069  |
| Standard deviation                   | 0.56     | 0.70          |            |              |         |
| <b>Sugar (grams)</b>                 |          |               |            |              |         |
| Average per-serving                  | 3.15     | 3.00          | -0.15      | -4.88%       | 0.1436  |
| Standard deviation                   | 2.75     | 2.75          |            |              |         |
| <b>Sodium (milligrams)</b>           |          |               |            |              |         |
| Average per-serving                  | 270.90   | 290.83        | 19.93      | 7.10%        | 0.0000  |
| Standard deviation                   | 73.92    | 58.78         |            |              |         |
| <b>Dietary fiber (grams)</b>         |          |               |            |              |         |
| Average per-serving                  | 2.64     | 2.01          | -0.62      | -26.89%      | 0.0000  |
| Standard deviation                   | 2.04     | 1.62          |            |              |         |
| <b>No. of UPCs</b>                   | 1,936    | 1,143         |            |              |         |

\*Serving = 57 grams

## Types and Frequencies of Reformulation: **Yogurt**

Calculations using InfoScan Data for UPCs with positive sales

|                                      | 2014         |               |            |              |         |
|--------------------------------------|--------------|---------------|------------|--------------|---------|
| Average per-serving nutrient values* | National     | Private Label | Difference | % Difference | p-value |
| <b>All UPCs</b>                      |              |               |            |              |         |
| <b>Calories</b>                      |              |               |            |              |         |
| Average per-serving                  | 146.70       | 127.18        | -19.52     | -14.26%      | 0.0000  |
| Standard deviation                   | 43.19        | 38.27         |            |              |         |
| <b>Saturated fat (grams)</b>         |              |               |            |              |         |
| Average per-serving                  | 1.39         | 0.44          | -0.95      | -103.11%     | 0.0000  |
| Standard deviation                   | 2.11         | 0.66          |            |              |         |
| <b>Sugar (grams)</b>                 |              |               |            |              |         |
| Average per-serving                  | 19.05        | 17.82         | -1.24      | -6.70%       | 0.0010  |
| Standard deviation                   | 7.55         | 8.69          |            |              |         |
| <b>Sodium (milligrams)</b>           |              |               |            |              |         |
| Average per-serving                  | 89.25        | 96.10         | 6.85       | 7.39%        | 0.0000  |
| Standard deviation                   | 25.98        | 24.58         |            |              |         |
| <b>Dietary fiber (grams)</b>         |              |               |            |              |         |
| Average per-serving                  | 0.43         | 0.41          | -0.02      | -3.66%       | 0.7982  |
| Standard deviation                   | 1.25         | 1.34          |            |              |         |
| <b>No. of UPCs</b>                   | <b>1,174</b> | <b>749</b>    |            |              |         |

\*Serving = 170 grams
