# Supplementary material for: How Much Can Product Reformulation Improve Diet Quality in Households with Children and Adolescents?
Source: MDPI journal article supplement (doi:10.3390/nu11030618), 2019-03-14
Supplement: s1 [file s1]

# Number of UPC's, Units and Total Sales of UPC's that Meet CFBAI Criteria (2014): [Cereal Bars](#)

Calculations using InfoScan Data for UPCs with positive sales

|                              | Brand Type    | N UPCs | % UPCs | N Units       | % Units | \$ Sales      | % Sales | N Servings*   | \$/Serving |
|------------------------------|---------------|--------|--------|---------------|---------|---------------|---------|---------------|------------|
| Meets CFBAI criteria         | NATIONAL      | 131    | 3.1    | 108,631,565   | 8.2     | 337,579,810   | 8.9     | 687,014,080   | \$0.67     |
|                              | PRIVATE LABEL | 35     | 5.3    | 2,053,543     | 3.4     | 4,406,575     | 3.7     | 13,643,576    | \$0.44     |
|                              | ALL           | 166    | 3.4    | 110,685,107   | 8.0     | 341,986,385   | 8.7     | 697,360,656   | \$0.62     |
| Does not meet CFBAI criteria | NATIONAL      | 1,981  | 46.2   | 1,129,187,543 | 85.7    | 3,055,452,778 | 80.6    | 5,602,119,366 | \$1.05     |
|                              | PRIVATE LABEL | 311    | 46.9   | 46,318,025    | 76.6    | 91,491,427    | 76.0    | 303,028,455   | \$0.37     |
|                              | ALL           | 2,292  | 46.3   | 1,175,505,568 | 85.3    | 3,146,944,205 | 80.5    | 5,905,147,821 | \$0.96     |
| No nutrition                 | NATIONAL      | 2,173  | 50.7   | 80,265,586    | 6.1     | 396,552,429   | 10.5    |               |            |
|                              | PRIVATE LABEL | 317    | 47.8   | 12,078,427    | 20.0    | 24,532,550    | 20.4    |               |            |
|                              | ALL           | 2,490  | 50.3   | 92,344,013    | 6.7     | 421,084,979   | 10.8    |               |            |
| Total                        | NATIONAL      | 4,285  | 86.6   | 1,318,084,694 | 95.6    | 3,789,585,017 | 96.9    |               |            |
|                              | PRIVATE LABEL | 663    | 13.4   | 60,449,994    | 4.4     | 120,430,552   | 3.1     |               |            |
|                              | ALL           | 4,948  | 100.0  | 1,378,534,688 | 100.0   | 3,910,015,570 | 100.0   |               |            |

\*Serving size = Labeled serving size (LSS)

## Test for Price Differences - Meets vs Does Not Meet (2014): [Cereal Bars](#)

|               | Meets CFBAI criteria |            | Does not meet CFBAI criteria |            | Difference       |         |
|---------------|----------------------|------------|------------------------------|------------|------------------|---------|
|               | N                    | \$/Serving | N                            | \$/Serving | (Meets-Not meet) | P-value |
| NATIONAL      | 131                  | \$0.67     | 1,981                        | \$1.05     | -\$0.38          | <0.0001 |
| PRIVATE LABEL | 35                   | \$0.44     | 311                          | \$0.37     | \$0.07           | 0.0007  |
| ALL           | 166                  | \$0.62     | 2,292                        | \$0.96     | -\$0.34          | <0.0001 |

**Number of UPC's, Units and Total Sales of UPC's that Meet CFBAI Criteria (2014): Crackers**

*Calculations using InfoScan Data for UPCs with positive sales*

|                              | Brand Type    | N UPCs | % UPCs | N Units       | % Units | \$ Sales      | % Sales | N Servings*    | \$/Serving |
|------------------------------|---------------|--------|--------|---------------|---------|---------------|---------|----------------|------------|
| Meets CFBAI criteria         | NATIONAL      | 155    | 3.7    | 202,660,578   | 11.4    | 545,545,282   | 11.5    | 1,782,567,619  | \$0.47     |
|                              | PRIVATE LABEL | 47     | 3.9    | 3,192,431     | 3.5     | 6,674,379     | 3.5     | 25,505,589     | \$0.31     |
|                              | ALL           | 202    | 3.7    | 205,853,009   | 11.0    | 552,219,661   | 11.2    | 1,808,073,207  | \$0.43     |
| Does not meet CFBAI criteria | NATIONAL      | 1,746  | 41.5   | 1,451,475,273 | 81.7    | 3,819,192,089 | 80.4    | 18,228,157,454 | \$0.41     |
|                              | PRIVATE LABEL | 535    | 44.9   | 75,003,812    | 81.1    | 151,351,495   | 79.8    | 1,018,282,855  | \$0.21     |
|                              | ALL           | 2,281  | 42.2   | 1,526,479,085 | 81.7    | 3,970,543,584 | 80.4    | 19,246,440,309 | \$0.36     |
| No nutrition                 | NATIONAL      | 2,310  | 54.9   | 122,491,775   | 6.9     | 383,182,186   | 8.1     |                |            |
|                              | PRIVATE LABEL | 609    | 51.1   | 14,268,124    | 15.4    | 31,742,165    | 16.7    |                |            |
|                              | ALL           | 2,919  | 54.0   | 136,759,899   | 7.3     | 414,924,351   | 8.4     |                |            |
| Total                        | NATIONAL      | 4,211  | 78.0   | 1,776,627,626 | 95.1    | 4,747,919,557 | 96.2    |                |            |
|                              | PRIVATE LABEL | 1,191  | 22.0   | 92,464,367    | 4.9     | 189,768,039   | 3.8     |                |            |
|                              | ALL           | 5,402  | 100.0  | 1,869,091,993 | 100.0   | 4,937,687,596 | 100.0   |                |            |

\*Serving size = Labeled serving size (LSS)

**Test for Price Differences - Meets vs Does Not Meet (2014): Crackers**

|               | Meets CFBAI criteria |            | Does not meet CFBAI criteria |            | Difference       | P-value |
|---------------|----------------------|------------|------------------------------|------------|------------------|---------|
|               | N                    | \$/Serving | N                            | \$/Serving | (Meets-Not meet) |         |
| NATIONAL      | 155                  | \$0.47     | 1,746                        | \$0.41     | \$0.06           | 0.0063  |
| PRIVATE LABEL | 47                   | \$0.31     | 535                          | \$0.21     | \$0.10           | 0.0002  |
| ALL           | 202                  | \$0.43     | 2,281                        | \$0.36     | \$0.07           | 0.0002  |

**Number of UPC's, Units and Total Sales of UPC's that Meet CFBAI Criteria (2014): [Pizza](#)**

*Calculations using InfoScan Data for UPCs with positive sales*

|                              | Brand Type    | N UPCs | % UPCs | N Units     | % Units | \$ Sales      | % Sales | N Servings*   | \$/Serving |
|------------------------------|---------------|--------|--------|-------------|---------|---------------|---------|---------------|------------|
| Meets CFBAI criteria         | NATIONAL      | 16     | 0.8    | 14,885,701  | 1.7     | 45,847,025    | 1.6     | 18,205,575    | \$2.72     |
|                              | PRIVATE LABEL | 0      | 0.0    | 0           | 0.0     | 0             | 0.0     | 0             | \$0.00     |
|                              | ALL           | 16     | 0.6    | 14,885,701  | 1.5     | 45,847,025    | 1.5     | 18,205,575    | \$2.72     |
| Does not meet CFBAI criteria | NATIONAL      | 921    | 47.5   | 848,469,118 | 95.9    | 2,678,175,388 | 94.2    | 2,804,445,339 | \$1.43     |
|                              | PRIVATE LABEL | 538    | 56.2   | 70,512,411  | 87.2    | 232,874,771   | 87.6    | 274,781,095   | \$1.06     |
|                              | ALL           | 1,459  | 50.4   | 918,981,529 | 95.2    | 2,911,050,159 | 93.6    | 3,079,226,433 | \$1.29     |
| No nutrition                 | NATIONAL      | 1,000  | 51.6   | 21,292,408  | 2.4     | 118,695,794   | 4.2     |               |            |
|                              | PRIVATE LABEL | 419    | 43.8   | 10,338,750  | 12.8    | 33,102,712    | 12.4    |               |            |
|                              | ALL           | 1,419  | 49.0   | 31,631,158  | 3.3     | 151,798,506   | 4.9     |               |            |
| Total                        | NATIONAL      | 1,937  | 66.9   | 884,647,227 | 91.6    | 2,842,718,207 | 91.4    |               |            |
|                              | PRIVATE LABEL | 957    | 33.1   | 80,851,161  | 8.4     | 265,977,483   | 8.6     |               |            |
|                              | ALL           | 2,894  | 100.0  | 965,498,388 | 100.0   | 3,180,695,690 | 100.0   |               |            |

\*Serving size = Labeled serving size (LSS)

**Test for Price Differences - Meets vs Does Not Meet (2014): [Pizza](#)**

|               | Meets CFBAI criteria |            | Does not meet CFBAI criteria |            | Difference       | P-value |
|---------------|----------------------|------------|------------------------------|------------|------------------|---------|
|               | N                    | \$/Serving | N                            | \$/Serving | (Meets-Not meet) |         |
| NATIONAL      | 16                   | \$2.72     | 921                          | \$1.43     | \$1.29           | <0.0001 |
| PRIVATE LABEL | 0                    | \$0.00     | 538                          | \$1.06     | -\$1.06          |         |
| ALL           | 16                   | \$2.72     | 1,459                        | \$1.29     | \$1.43           | <0.0001 |

# Number of UPC's, Units and Total Sales of UPC's that Meet CFBAI Criteria (2014): [Potato Chips](#)

Calculations using InfoScan Data for UPCs with positive sales

|                              | Brand Type    | N UPCs | % UPCs | N Units       | % Units | \$ Sales      | % Sales | N Servings*    | \$/Serving |
|------------------------------|---------------|--------|--------|---------------|---------|---------------|---------|----------------|------------|
| Meets CFBAI criteria         | NATIONAL      | 3      | 0.1    | 236,623       | 0.02    | 838,270       | 0.03    | 970,661        | \$0.97     |
|                              | PRIVATE LABEL | 0      | 0.0    | 0             | 0.00    | 0             | 0.00    | 0              | \$0.00     |
|                              | ALL           | 3      | 0.1    | 236,623       | 0.02    | 838,270       | 0.02    | 970,661        | \$0.97     |
| Does not meet CFBAI criteria | NATIONAL      | 1,640  | 54.1   | 1,276,024,034 | 96.3    | 3,083,222,641 | 95.9    | 10,288,466,787 | \$0.40     |
|                              | PRIVATE LABEL | 336    | 56.4   | 86,566,526    | 87.7    | 163,121,868   | 89.5    | 830,548,169    | \$0.23     |
|                              | ALL           | 1,976  | 54.5   | 1,362,590,560 | 95.7    | 3,246,344,509 | 95.6    | 11,119,014,956 | \$0.37     |
| No nutrition                 | NATIONAL      | 1,388  | 45.8   | 49,325,945    | 3.7     | 130,236,664   | 4.1     |                |            |
|                              | PRIVATE LABEL | 260    | 43.6   | 12,110,183    | 12.3    | 19,172,411    | 10.5    |                |            |
|                              | ALL           | 1,648  | 45.4   | 61,436,128    | 4.3     | 149,409,075   | 4.4     |                |            |
| Total                        | NATIONAL      | 3,031  | 83.6   | 1,325,586,602 | 93.1    | 3,214,297,575 | 94.6    |                |            |
|                              | PRIVATE LABEL | 596    | 16.4   | 98,676,709    | 6.9     | 182,294,279   | 5.4     |                |            |
|                              | ALL           | 3,627  | 100.0  | 1,424,263,311 | 100.0   | 3,396,591,854 | 100.0   |                |            |

\*Serving size = Labeled serving size (LSS)

## Test for Price Differences - Meets vs Does Not Meet (2014): [Potato Chips](#)

|               | Meets CFBAI criteria |            | Does not meet CFBAI criteria |            | Difference       | P-value |
|---------------|----------------------|------------|------------------------------|------------|------------------|---------|
|               | N                    | \$/Serving | N                            | \$/Serving | (Meets-Not meet) |         |
| NATIONAL      | 3                    | \$0.97     | 1,640                        | \$0.40     | \$0.57           | <0.0001 |
| PRIVATE LABEL | 0                    | \$0.00     | 336                          | \$0.23     | -\$0.23          |         |
| ALL           | 3                    | \$0.97     | 1,976                        | \$0.37     | \$0.60           | <0.0001 |

# Number of UPC's, Units and Total Sales of UPC's that Meet CFBAI Criteria (2014): RTE Cereal

Calculations using InfoScan Data for UPCs with positive sales

|                              | Brand Type    | N UPCs | % UPCs | N Units       | % Units | \$ Sales      | % Sales | N Servings*    | \$/Serving |
|------------------------------|---------------|--------|--------|---------------|---------|---------------|---------|----------------|------------|
| Meets CFBAI criteria         | NATIONAL      | 220    | 8.7    | 284,962,491   | 14.6    | 956,929,183   | 15.0    | 3,853,245,885  | \$0.34     |
|                              | PRIVATE LABEL | 122    | 6.5    | 16,395,921    | 10.7    | 38,322,200    | 10.2    | 240,788,974    | \$0.18     |
|                              | ALL           | 342    | 7.8    | 301,358,412   | 14.3    | 995,251,383   | 14.7    | 4,094,034,858  | \$0.28     |
| Does not meet CFBAI criteria | NATIONAL      | 1,280  | 50.8   | 1,599,716,093 | 81.7    | 5,185,664,699 | 81.2    | 23,221,430,412 | \$0.35     |
|                              | PRIVATE LABEL | 1,121  | 59.8   | 117,768,075   | 76.6    | 283,034,187   | 75.6    | 1,572,274,018  | \$0.21     |
|                              | ALL           | 2,401  | 54.7   | 1,717,484,168 | 81.4    | 5,468,698,886 | 80.9    | 24,793,704,430 | \$0.29     |
| No nutrition                 | NATIONAL      | 1,019  | 40.5   | 72,319,777    | 3.7     | 244,072,550   | 3.8     |                |            |
|                              | PRIVATE LABEL | 631    | 33.7   | 19,524,795    | 12.7    | 52,910,823    | 14.1    |                |            |
|                              | ALL           | 1,650  | 37.6   | 91,844,572    | 4.4     | 296,983,373   | 4.4     |                |            |
| Total                        | NATIONAL      | 2,519  | 57.3   | 1,956,998,361 | 92.7    | 6,386,666,432 | 94.5    |                |            |
|                              | PRIVATE LABEL | 1,874  | 42.7   | 153,688,791   | 7.3     | 374,267,210   | 5.5     |                |            |
|                              | ALL           | 4,393  | 100.0  | 2,110,687,152 | 100.0   | 6,760,933,642 | 100.0   |                |            |

\*Serving size = Labeled serving size (LSS)

## Test for Price Differences - Meets vs Does Not Meet (2014): RTE Cereal

|               | Meets CFBAI criteria |            | Does not meet CFBAI criteria |            | Difference       |         |
|---------------|----------------------|------------|------------------------------|------------|------------------|---------|
|               | N                    | \$/Serving | N                            | \$/Serving | (Meets-Not meet) | P-value |
| NATIONAL      | 220                  | \$0.34     | 1,280                        | \$0.35     | -\$0.01          | 0.6048  |
| PRIVATE LABEL | 122                  | \$0.18     | 1,121                        | \$0.21     | -\$0.03          | <0.0001 |
| ALL           | 342                  | \$0.28     | 2,401                        | \$0.29     | -\$0.01          | 0.8199  |

**Number of UPC's, Units and Total Sales of UPC's that Meet CFBAI Criteria (2014): Tortilla and Other Chips**

*Calculations using InfoScan Data for UPCs with positive sales*

|                              | Brand Type    | N UPCs | % UPCs | N Units       | % Units | \$ Sales      | % Sales | N Servings*    | \$/Serving |
|------------------------------|---------------|--------|--------|---------------|---------|---------------|---------|----------------|------------|
| Meets CFBAI criteria         | NATIONAL      | 113    | 3.1    | 38,681,738    | 2.1     | 100,587,559   | 2.3     | 232,769,835    | \$0.49     |
|                              | PRIVATE LABEL | 12     | 2.0    | 691,216       | 0.9     | 1,971,137     | 1.5     | 8,190,514      | \$0.29     |
|                              | ALL           | 125    | 3.0    | 39,372,954    | 2.0     | 102,558,696   | 2.3     | 240,960,349    | \$0.47     |
| Does not meet CFBAI criteria | NATIONAL      | 1,480  | 41.1   | 1,708,266,954 | 91.7    | 4,045,748,816 | 91.3    | 15,605,001,398 | \$0.37     |
|                              | PRIVATE LABEL | 303    | 51.2   | 65,372,537    | 85.7    | 113,403,076   | 84.0    | 681,416,849    | \$0.22     |
|                              | ALL           | 1,783  | 42.6   | 1,773,639,491 | 91.5    | 4,159,151,892 | 91.1    | 16,286,418,247 | \$0.35     |
| No nutrition                 | NATIONAL      | 2,004  | 55.7   | 116,165,708   | 6.2     | 283,837,651   | 6.4     |                |            |
|                              | PRIVATE LABEL | 277    | 46.8   | 10,231,609    | 13.4    | 19,681,049    | 14.6    |                |            |
|                              | ALL           | 2,281  | 54.5   | 126,397,317   | 6.5     | 303,518,700   | 6.6     |                |            |
| Total                        | NATIONAL      | 3,597  | 85.9   | 1,863,114,400 | 96.1    | 4,430,174,026 | 97.0    |                |            |
|                              | PRIVATE LABEL | 592    | 14.1   | 76,295,362    | 3.9     | 135,055,262   | 3.0     |                |            |
|                              | ALL           | 4,189  | 100.0  | 1,939,409,762 | 100.0   | 4,565,229,288 | 100.0   |                |            |

\*Serving size = Labeled serving size (LSS)

**Test for Price Differences - Meets vs Does Not Meet (2014): Tortilla and Other Chips**

|               | Meets CFBAI criteria |            | Does not meet CFBAI criteria |            | Difference       |         |
|---------------|----------------------|------------|------------------------------|------------|------------------|---------|
|               | N                    | \$/Serving | N                            | \$/Serving | (Meets-Not meet) | P-value |
| NATIONAL      | 113                  | \$0.49     | 1,480                        | \$0.37     | \$0.12           | <0.0001 |
| PRIVATE LABEL | 12                   | \$0.29     | 303                          | \$0.22     | \$0.07           | 0.0829  |
| ALL           | 125                  | \$0.47     | 1,783                        | \$0.35     | \$0.12           | <0.0001 |

# Number of UPC's, Units and Total Sales of UPC's that Meet CFBAI Criteria (2014): [Yeast Breads](#)

Calculations using InfoScan Data for UPCs with positive sales

|                              | Brand Type    | N UPCs | % UPCs | N Units       | % Units | \$ Sales      | % Sales | N Servings*    | \$/Serving |
|------------------------------|---------------|--------|--------|---------------|---------|---------------|---------|----------------|------------|
| Meets CFBAI criteria         | NATIONAL      | 438    | 7.5    | 394,838,774   | 22.1    | 1,158,479,367 | 23.3    | 4,997,857,620  | \$0.30     |
|                              | PRIVATE LABEL | 120    | 4.3    | 31,157,445    | 5.2     | 67,194,531    | 6.6     | 443,466,407    | \$0.19     |
|                              | ALL           | 558    | 6.5    | 425,996,219   | 17.8    | 1,225,673,898 | 20.5    | 5,441,324,027  | \$0.28     |
| Does not meet CFBAI criteria | NATIONAL      | 1,498  | 25.7   | 1,308,268,787 | 73.1    | 3,550,778,139 | 71.4    | 21,509,356,040 | \$0.28     |
|                              | PRIVATE LABEL | 1,023  | 36.8   | 483,938,899   | 81.0    | 757,949,617   | 74.5    | 7,762,317,034  | \$0.20     |
|                              | ALL           | 2,521  | 29.3   | 1,792,207,686 | 75.1    | 4,308,727,756 | 71.9    | 29,271,673,075 | \$0.25     |
| No nutrition                 | NATIONAL      | 3,895  | 66.8   | 87,366,251    | 4.9     | 265,212,939   | 5.3     |                |            |
|                              | PRIVATE LABEL | 1,636  | 58.9   | 82,027,744    | 13.7    | 192,577,422   | 18.9    |                |            |
|                              | ALL           | 5,531  | 64.2   | 169,393,995   | 7.1     | 457,790,361   | 7.6     |                |            |
| Total                        | NATIONAL      | 5,831  | 67.7   | 1,790,473,812 | 75.0    | 4,974,470,445 | 83.0    |                |            |
|                              | PRIVATE LABEL | 2,779  | 32.3   | 597,124,088   | 25.0    | 1,017,721,570 | 17.0    |                |            |
|                              | ALL           | 8,610  | 100.0  | 2,387,597,900 | 100.0   | 5,992,192,015 | 100.0   |                |            |

\*Serving size = Labeled serving size (LSS)

## Test for Price Differences - Meets vs Does Not Meet (2014): [Yeast Breads](#)

|               | Meets CFBAI criteria |            | Does not meet CFBAI criteria |            | Difference       |         |
|---------------|----------------------|------------|------------------------------|------------|------------------|---------|
|               | N                    | \$/Serving | N                            | \$/Serving | (Meets-Not meet) | P-value |
| NATIONAL      | 438                  | \$0.30     | 1,498                        | \$0.28     | \$0.02           | 0.2158  |
| PRIVATE LABEL | 120                  | \$0.19     | 1,023                        | \$0.20     | -\$0.01          | 0.1613  |
| ALL           | 558                  | \$0.28     | 2,521                        | \$0.25     | \$0.03           | 0.0594  |

## Number of UPC's, Units and Total Sales of UPC's that Meet CFBAI Criteria (2014): [Yogurt](#)

Calculations using InfoScan Data for UPCs with positive sales

|                              | Brand Type    | N UPCs | % UPCs | N Units       | % Units | \$ Sales      | % Sales | N Servings*   | \$/Serving |
|------------------------------|---------------|--------|--------|---------------|---------|---------------|---------|---------------|------------|
| Meets CFBAI criteria         | NATIONAL      | 631    | 24.0   | 1,134,383,289 | 34.4    | 1,875,316,188 | 39.5    | 1,916,137,956 | \$0.96     |
|                              | PRIVATE LABEL | 495    | 31.3   | 237,374,727   | 55.6    | 190,685,135   | 55.7    | 326,625,113   | \$0.65     |
|                              | ALL           | 1,126  | 26.7   | 1,371,758,016 | 36.8    | 2,066,001,323 | 40.6    | 2,242,763,069 | \$0.82     |
| Does not meet CFBAI criteria | NATIONAL      | 543    | 20.6   | 685,899,004   | 20.8    | 1,097,545,110 | 23.1    | 1,269,843,981 | \$0.89     |
|                              | PRIVATE LABEL | 254    | 16.1   | 105,301,374   | 24.7    | 83,269,301    | 24.3    | 191,344,519   | \$0.47     |
|                              | ALL           | 797    | 18.9   | 791,200,378   | 21.3    | 1,180,814,412 | 23.2    | 1,461,188,499 | \$0.76     |
| No nutrition                 | NATIONAL      | 1,460  | 55.4   | 1,475,709,328 | 44.8    | 1,779,725,539 | 37.4    | 2,672,167,856 | \$0.92     |
|                              | PRIVATE LABEL | 831    | 52.6   | 84,129,735    | 19.7    | 68,364,159    | 20.0    | 109,140,850   | \$0.71     |
|                              | ALL           | 2,291  | 54.4   | 1,559,839,063 | 41.9    | 1,848,089,697 | 36.3    | 2,781,308,707 | \$0.84     |
| Total                        | NATIONAL      | 2,634  | 62.5   | 3,295,991,621 | 88.5    | 4,752,586,837 | 93.3    | 5,858,149,793 | \$0.92     |
|                              | PRIVATE LABEL | 1,580  | 37.5   | 426,805,836   | 11.5    | 342,318,595   | 6.7     | 627,110,482   | \$0.65     |
|                              | ALL           | 4,214  | 100.0  | 3,722,797,457 | 100.0   | 5,094,905,432 | 100.0   | 6,485,260,275 | \$0.82     |

\*Serving size = 6 ounces (170 grams)

## Test for Price Differences - Meets vs Does Not Meet (2014): [Yogurt](#)

|               | Meets CFBAI criteria |            | Does not meet CFBAI criteria |            | Difference       |         |
|---------------|----------------------|------------|------------------------------|------------|------------------|---------|
|               | N                    | \$/Serving | N                            | \$/Serving | (Meets-Not meet) | P-value |
| NATIONAL      | 631                  | \$0.96     | 543                          | \$0.89     | \$0.07           | 0.0060  |
| PRIVATE LABEL | 495                  | \$0.65     | 254                          | \$0.47     | \$0.18           | <0.0001 |
| ALL           | 1,126                | \$0.82     | 797                          | \$0.76     | \$0.06           | <0.0001 |
