# Supplementary material for: How Much Can Product Reformulation Improve Diet Quality in Households with Children and Adolescents?
Source: MDPI journal article supplement (doi:10.3390/nu11030618), 2019-03-14
Supplement: s1 [file s1]

## Comparison of Average Nutrient Values for Products in 2014 versus 1-star, 2-star, and 3-star Products

| Nutrient              | Baseline          | Baseline           | Healthier         | 1-star target                    |                                     | 2-star target (if available) |                                  |                                     | 3-star target (if available) |                                  |                                     |
|-----------------------|-------------------|--------------------|-------------------|----------------------------------|-------------------------------------|------------------------------|----------------------------------|-------------------------------------|------------------------------|----------------------------------|-------------------------------------|
|                       | (2014<br>Average) | (2014 St.<br>Dev.) | Product<br>Values | Change for<br>Average<br>Product | % Change<br>Relative to<br>Baseline | Product<br>Values            | Change for<br>Average<br>Product | % Change<br>Relative to<br>Baseline | Product<br>Values            | Change for<br>Average<br>Product | % Change<br>Relative to<br>Baseline |
| Cereal bars           |                   |                    |                   |                                  |                                     |                              |                                  |                                     |                              |                                  |                                     |
| Calories              | 142.9             | 18.6               | 138.4             | -4.5                             | -3.1%                               | 143.3                        | 0.4                              | 0.3%                                |                              |                                  |                                     |
| Saturated Fat (g)     | 1.9               | 1.3                | 1.3               | -0.6                             | -31.6%                              | 1.1                          | -0.8                             | -42.1%                              |                              |                                  |                                     |
| Sugars (g)            | 9.4               | 3.9                | 8.1               | -1.3                             | -13.8%                              | 5.9                          | -3.5                             | -37.2%                              |                              |                                  |                                     |
| Sodium (mg)           | 104.2             | 47.2               | 80.5              | -23.7                            | -22.7%                              | 80.3                         | -23.9                            | -22.9%                              |                              |                                  |                                     |
| Dietary Fiber (g)     | 2.6               | 2.0                | 3.8               | 1.2                              | 46.2%                               | 4.2                          | 1.6                              | 61.5%                               |                              |                                  |                                     |
| Cookies & brownies    |                   |                    |                   |                                  |                                     |                              |                                  |                                     |                              |                                  |                                     |
| Calories              | 136.3             | 18.4               | 127.8             | -8.5                             | -6.2%                               | 121.6                        | -14.7                            | -10.8%                              |                              |                                  |                                     |
| Saturated Fat (g)     | 2.4               | 1.5                | 0.7               | -1.7                             | -70.8%                              | 0.9                          | -1.5                             | -62.5%                              |                              |                                  |                                     |
| Sugars (g)            | 9.9               | 3.2                | 6.2               | -3.7                             | -37.4%                              | 4.4                          | -5.5                             | -55.6%                              |                              |                                  |                                     |
| Sodium (mg)           | 91.8              | 38.3               | 80.9              | -10.9                            | -11.9%                              | 92.7                         | 0.9                              | 1.0%                                |                              |                                  |                                     |
| Dietary Fiber (g)     | 0.7               | 0.8                | 2.9               | 2.2                              | 314.3%                              | 2.5                          | 1.8                              | 257.1%                              |                              |                                  |                                     |
| Crackers              |                   |                    |                   |                                  |                                     |                              |                                  |                                     |                              |                                  |                                     |
| Calories              | 131.4             | 18.1               | 129.2             | -2.2                             | -1.7%                               | 131.6                        | 0.2                              | 0.2%                                | 137.2                        | 5.8                              | 4.4%                                |
| Saturated Fat (g)     | 0.9               | 1.1                | 0.4               | -0.5                             | -55.6%                              | 0.4                          | -0.5                             | -55.6%                              | 0.6                          | -0.3                             | -33.3%                              |
| Sugars (g)            | 2.2               | 2.6                | 0.5               | -1.7                             | -77.3%                              | 0.3                          | -1.9                             | -86.4%                              | 0.2                          | -2.0                             | -90.9%                              |
| Sodium (mg)           | 209.2             | 101                | 175.1             | -34.1                            | -16.3%                              | 137                          | -72.2                            | -34.5%                              | 122.0                        | -87.2                            | -41.7%                              |
| Dietary Fiber (g)     | 1.3               | 1.1                | 1.7               | 0.4                              | 30.8%                               | 3.2                          | 1.9                              | 146.2%                              | 4.3                          | 3.0                              | 230.8%                              |
| Fruit Drinks          |                   |                    |                   |                                  |                                     |                              |                                  |                                     |                              |                                  |                                     |
| Calories              | 94.9              | 41.1               | 25.8              | -69.1                            | -72.8%                              |                              |                                  |                                     |                              |                                  |                                     |
| Saturated Fat (g)     |                   |                    |                   |                                  |                                     |                              |                                  |                                     |                              |                                  |                                     |
| Sugars (g)            | 22.6              | 10.1               | 5.7               | -16.9                            | -74.8%                              |                              |                                  |                                     |                              |                                  |                                     |
| Sodium (mg)           | 34.3              | 35.7               | 16.6              | -17.7                            | -51.6%                              |                              |                                  |                                     |                              |                                  |                                     |
| Dietary Fiber (g)     |                   |                    |                   |                                  |                                     |                              |                                  |                                     |                              |                                  |                                     |
| Ice Cream             |                   |                    |                   |                                  |                                     |                              |                                  |                                     |                              |                                  |                                     |
| Calories              | 140.2             | 38.9               | 85.9              | -54.3                            | -38.7%                              |                              |                                  |                                     |                              |                                  |                                     |
| Saturated Fat (g)     | 3.9               | 2.3                | 1.0               | -2.9                             | -74.4%                              |                              |                                  |                                     |                              |                                  |                                     |
| Sugars (g)            | 13.8              | 3.2                | 5.0               | -8.8                             | -63.8%                              |                              |                                  |                                     |                              |                                  |                                     |
| Sodium (mg)           | 57.9              | 31.6               | 66.7              | 8.8                              | 15.2%                               |                              |                                  |                                     |                              |                                  |                                     |
| Dietary Fiber (g)     | 0.5               | 0.9                | 3.7               | 3.2                              | 640.0%                              |                              |                                  |                                     |                              |                                  |                                     |
| Macaroni & cheese mix |                   |                    |                   |                                  |                                     |                              |                                  |                                     |                              |                                  |                                     |
| Calories              | 245.3             | 24.7               | 248.7             | 3.4                              | 1.4%                                |                              |                                  |                                     |                              |                                  |                                     |
| Saturated Fat (g)     | 1.8               | 1.2                | 1.8               | 0.0                              | 0.0%                                |                              |                                  |                                     |                              |                                  |                                     |
| Sugars (g)            | 4.7               | 2.2                | 4.6               | -0.1                             | -2.1%                               |                              |                                  |                                     |                              |                                  |                                     |
| Sodium (mg)           | 589.4             | 95.9               | 544.1             | -45.3                            | -7.7%                               |                              |                                  |                                     |                              |                                  |                                     |
| Dietary Fiber (g)     | 1.6               | 0.9                | 2.6               | 1.0                              | 62.5%                               |                              |                                  |                                     |                              |                                  |                                     |

## Comparison of Average Nutrient Values for Products in 2014 versus 1-star, 2-star, and 3-star Products

| Nutrient                              | 1-star target                 |                                |                                |                                  |                                     | 2-star target (if available)   |                                  |                                     | 3-star target (if available)   |                                  |                                     |
|---------------------------------------|-------------------------------|--------------------------------|--------------------------------|----------------------------------|-------------------------------------|--------------------------------|----------------------------------|-------------------------------------|--------------------------------|----------------------------------|-------------------------------------|
|                                       | Baseline<br>(2014<br>Average) | Baseline<br>(2014 St.<br>Dev.) | Healthier<br>Product<br>Values | Change for<br>Average<br>Product | % Change<br>Relative to<br>Baseline | Healthier<br>Product<br>Values | Change for<br>Average<br>Product | % Change<br>Relative to<br>Baseline | Healthier<br>Product<br>Values | Change for<br>Average<br>Product | % Change<br>Relative to<br>Baseline |
| <b>Pizza</b>                          |                               |                                |                                |                                  |                                     |                                |                                  |                                     |                                |                                  |                                     |
| Calories                              | 337.0                         | 40.2                           | 334.6                          | -2.4                             | -0.7%                               |                                |                                  |                                     |                                |                                  |                                     |
| Saturated Fat (g)                     | 5.9                           | 2.1                            | 4.7                            | -1.2                             | -20.3%                              |                                |                                  |                                     |                                |                                  |                                     |
| Sugars (g)                            | 4.2                           | 2.6                            | 2.9                            | -1.3                             | -31.0%                              |                                |                                  |                                     |                                |                                  |                                     |
| Sodium (mg)                           | 733.6                         | 170.0                          | 585.4                          | -148.2                           | -20.2%                              |                                |                                  |                                     |                                |                                  |                                     |
| Dietary Fiber (g)                     | 2.3                           | 1.1                            | 5.3                            | 3.0                              | 130.4%                              |                                |                                  |                                     |                                |                                  |                                     |
| <b>Potato Chips</b>                   |                               |                                |                                |                                  |                                     |                                |                                  |                                     |                                |                                  |                                     |
| Calories                              | 149.9                         | 12.0                           | 147.5                          | -2.4                             | -1.6%                               | 140.4                          | -9.5                             | -6.3%                               |                                |                                  |                                     |
| Saturated Fat (g)                     | 1.8                           | 0.8                            | 1.2                            | -0.6                             | -33.3%                              | 0.9                            | -0.9                             | -50.0%                              |                                |                                  |                                     |
| Sugars (g)                            | 0.9                           | 0.9                            | 0.5                            | -0.4                             | -44.4%                              | 0.3                            | -0.6                             | -66.7%                              |                                |                                  |                                     |
| Sodium (mg)                           | 193.0                         | 84.1                           | 135.1                          | -57.9                            | -30.0%                              | 136.4                          | -56.6                            | -29.3%                              |                                |                                  |                                     |
| Dietary Fiber (g)                     | 1.0                           | 0.3                            | 1.2                            | 0.2                              | 20.0%                               | 2.1                            | 1.1                              | 110.0%                              |                                |                                  |                                     |
| <b>RTE cereal</b>                     |                               |                                |                                |                                  |                                     |                                |                                  |                                     |                                |                                  |                                     |
| Calories                              | 115.1                         | 11.8                           | 114.6                          | -0.5                             | -0.4%                               | 115.5                          | 0.4                              | 0.3%                                | 106.5                          | -8.6                             | -7.5%                               |
| Saturated Fat (g)                     | 0.2                           | 0.4                            | 0.2                            | 0.0                              | 0.0%                                | 0.2                            | 0.0                              | 0.0%                                | 0.1                            | -0.1                             | -50.0%                              |
| Sugars (g)                            | 8.0                           | 4.0                            | 6.8                            | -1.2                             | -15.0%                              | 5.4                            | -2.6                             | -32.5%                              | 1.1                            | -6.9                             | -86.3%                              |
| Sodium (mg)                           | 133.3                         | 74.1                           | 119.1                          | -14.2                            | -10.7%                              | 74.5                           | -58.8                            | -44.1%                              | 54.4                           | -78.9                            | -59.2%                              |
| Dietary Fiber (g)                     | 2.0                           | 1.6                            | 2.6                            | 0.6                              | 30.0%                               | 3.5                            | 1.5                              | 75.0%                               | 2.6                            | 0.6                              | 30.0%                               |
| <b>Tortilla Chips and Other Chips</b> |                               |                                |                                |                                  |                                     |                                |                                  |                                     |                                |                                  |                                     |
| Calories                              | 141.4                         | 16.3                           | 136.7                          | -4.7                             | -3.3%                               | 130.7                          | -10.7                            | -7.6%                               | 76.1                           | -65.3                            | -46.2%                              |
| Saturated Fat (g)                     | 1.5                           | 1.2                            | 0.9                            | -0.6                             | -40.0%                              | 0.6                            | -0.9                             | -60.0%                              | 0.5                            | -1.0                             | -66.7%                              |
| Sugars (g)                            | 0.8                           | 1.2                            | 1.2                            | 0.4                              | 50.0%                               | 1.2                            | 0.4                              | 50.0%                               | 2.1                            | 1.3                              | 162.5%                              |
| Sodium (mg)                           | 212.8                         | 179.6                          | 133.1                          | -79.7                            | -37.5%                              | 128.9                          | -83.9                            | -39.4%                              | 79.3                           | -133.5                           | -62.7%                              |
| Dietary Fiber (g)                     | 1.3                           | 0.9                            | 2.4                            | 1.1                              | 84.6%                               | 3                              | 1.7                              | 130.8%                              | 3.8                            | 2.5                              | 192.3%                              |
| <b>Yeast Breads</b>                   |                               |                                |                                |                                  |                                     |                                |                                  |                                     |                                |                                  |                                     |
| Calories                              | 144.9                         | 20.9                           | 163                            | 18.1                             | 12.5%                               | 123.1                          | -21.8                            | -15.0%                              | 128.8                          | -16.1                            | -11.1%                              |
| Saturated Fat (g)                     | 0.1                           | 0.6                            | 0.1                            | 0.0                              | 0.0%                                | 0.1                            | 0.0                              | 0.0%                                | 0.1                            | 0.0                              | 0.0%                                |
| Sugars (g)                            | 3.1                           | 2.8                            | 2.8                            | -0.3                             | -9.7%                               | 2.1                            | -1.0                             | -32.3%                              | 1.9                            | -1.2                             | -38.7%                              |
| Sodium (mg)                           | 278.3                         | 69.4                           | 274.5                          | -3.8                             | -1.4%                               | 223.8                          | -54.5                            | -19.6%                              | 201.9                          | -76.4                            | -27.5%                              |
| Dietary Fiber (g)                     | 2.4                           | 1.9                            | 2.4                            | 0.0                              | 0.0%                                | 4.6                            | 2.2                              | 91.7%                               | 5.7                            | 3.3                              | 137.5%                              |
| <b>Yogurt</b>                         |                               |                                |                                |                                  |                                     |                                |                                  |                                     |                                |                                  |                                     |
| Calories                              | 139.1                         | 42.4                           | 125.1                          | -14.0                            | -10.1%                              | 94.4                           | -44.7                            | -32.1%                              | 112.9                          | -26.2                            | -18.8%                              |
| Saturated Fat (g)                     | 1.0                           | 1.8                            | 1.4                            | 0.4                              | 40.0%                               | 0.6                            | -0.4                             | -40.0%                              | 0                              | -1.0                             | -100.0%                             |
| Sugars (g)                            | 18.6                          | 8.0                            | 12.7                           | -5.9                             | -31.7%                              | 8.3                            | -10.3                            | -55.4%                              | 7.9                            | -10.7                            | -57.5%                              |
| Sodium (mg)                           | 91.9                          | 25.7                           | 85.1                           | -6.8                             | -7.4%                               | 91.1                           | -0.8                             | -0.9%                               | 86.9                           | -5.0                             | -5.4%                               |
| Dietary Fiber (g)                     | 0.4                           | 1.3                            | 2.2                            | 1.8                              | 450.0%                              | 0.8                            | 0.4                              | 100.0%                              | 4.5                            | 4.1                              | 1025.0%                             |

Note:

Sugars is total sugars, including added sugars.

**Total Values for Annual Dietary Guidelines Targets by Demographic Group for Consumer Network Households with Children (Weighted), 2014**  
(units for nutrients = billions)

|                                      | All Households | Low Income (<185%<br>of Poverty Line) | High Income (185% of<br>Poverty Line) | Non-Hispanic White | Non-Hispanic Black | Hispanic   | Asian and Other | Urban      | Part Urban<br>/Part Rural | Rural     | Unspecified |
|--------------------------------------|----------------|---------------------------------------|---------------------------------------|--------------------|--------------------|------------|-----------------|------------|---------------------------|-----------|-------------|
| <b>Annual Dietary Guidelines</b>     |                |                                       |                                       |                    |                    |            |                 |            |                           |           |             |
| Calories                             | 95,320         | 59,298                                | 36,023                                | 61,302             | 9,758              | 17,305     | 6,955           | 60,205     | 24,302                    | 5,398     | 5415        |
| Saturated Fat (g)                    | 1,059          | 659                                   | 400                                   | 681                | 108                | 192        | 77              | 669        | 270                       | 60        | 60          |
| Sugars (g)                           | 2,383          | 1,483                                 | 900                                   | 1,533              | 244                | 433        | 174             | 1,505      | 608                       | 135       | 135         |
| Sodium (mg)                          | 115,697        | 71,635                                | 44,062                                | 74,404             | 11,897             | 20,935     | 8,461           | 73,043     | 29,535                    | 6,545     | 6574        |
| Dietary Fiber (g)                    | 1,334          | 830                                   | 504                                   | 858                | 137                | 242        | 97              | 843        | 340                       | 75        | 76          |
| <b>NHANES Nutrient Intakes</b>       |                |                                       |                                       |                    |                    |            |                 |            |                           |           |             |
| Calories                             | 108,361        | 41,070                                | 67,291                                | 69,743             | 10,985             | 19,734     | 7,899           | 68,406     | 27,710                    | 6,103     | 6,142       |
| Saturated Fat (g)                    | 1,375          | 522                                   | 853                                   | 885                | 140                | 250        | 100             | 868        | 352                       | 77        | 78          |
| Sugars (g)                           | 6,084          | 2,320                                 | 3,763                                 | 3,919              | 614                | 1,109      | 442             | 3,836      | 1,559                     | 343       | 346         |
| Sodium (mg)                          | 176,270        | 66,710                                | 109,561                               | 113,395            | 17,917             | 32,103     | 12,855          | 111,312    | 45,037                    | 9,933     | 9,988       |
| Dietary Fiber (g)                    | 828            | 313                                   | 515                                   | 533                | 84                 | 150        | 61              | 523        | 212                       | 47        | 47          |
| No. of households                    | 36,059,594     | 13,308,488                            | 22,751,106                            | 23,265,029         | 3,787,819          | 6,338,461  | 2,668,285       | 22,903,936 | 9,131,670                 | 1,983,848 | 2,040,140   |
| No. of household members             | 145,420,117    | 55,617,187                            | 89,802,930                            | 93,696,943         | 14,783,685         | 26,325,781 | 10,613,708      | 91,691,941 | 37,260,768                | 8,205,123 | 8,262,285   |
| No. of adult equivalent members      | 130,575,618    | 49,345,831                            | 81,229,787                            | 83,974,862         | 13,367,645         | 23,704,935 | 9,528,176       | 82,472,930 | 33,290,416                | 7,394,920 | 7,417,352   |
| Avg. no. of members per HH           | 4.0            | 4.2                                   | 3.9                                   | 4.0                | 3.9                | 4.2        | 4.0             | 4.0        | 4.1                       | 4.1       | 4.0         |
| Avg. no. of adult equivalents per HH | 3.6            | 3.7                                   | 3.6                                   | 3.6                | 3.5                | 3.7        | 3.6             | 3.6        | 3.6                       | 3.7       | 3.6         |

Poverty line information: <https://aspe.hhs.gov/2014-poverty-guidelines#thresholds>; assigned households based on value of the low end of income range

Dietary Guidelines targets: [https://health.gov/dietaryguidelines/2015/resources/2015-2020\\_Dietary\\_Guidelines.pdf](https://health.gov/dietaryguidelines/2015/resources/2015-2020_Dietary_Guidelines.pdf)

Annual targets calculated for 365 days of the year based on household composition in 2014.

**No. of Servings Purchased by Demographic Group for Consumer Network Households with Children (Weighted), 2014**

|                                | Number of<br>Households<br>(unweighted) | All Households | Low Income (<185%<br>of Poverty Line) | High Income (> 185%<br>of Poverty Line) | Non-Hispanic<br>White | Non-Hispanic<br>Black | Hispanic      | Asian and Other | Urban          | Part Urban<br>/Part Rural | Rural       | Unspecified |
|--------------------------------|-----------------------------------------|----------------|---------------------------------------|-----------------------------------------|-----------------------|-----------------------|---------------|-----------------|----------------|---------------------------|-------------|-------------|
| Cereal Bars                    | 12,033                                  | 3,900,324,546  | 1,094,145,575                         | 2,806,178,970                           | 2,858,861,477         | 250,014,011           | 556,544,634   | 234,904,424     | 2,479,040,492  | 990,442,622               | 205,095,190 | 225,746,241 |
| Cookies and Brownies           | 13,527                                  | 9,214,308,144  | 3,519,230,675                         | 5,695,077,469                           | 6,264,746,689         | 925,099,566           | 1,485,350,202 | 539,111,687     | 5,715,315,420  | 2,398,751,124             | 583,245,575 | 516,996,025 |
| Crackers                       | 13,543                                  | 7,678,637,914  | 2,533,934,561                         | 5,144,703,354                           | 5,601,517,625         | 581,218,301           | 1,059,050,082 | 436,851,906     | 4,811,602,462  | 2,023,114,328             | 443,526,413 | 400,394,711 |
| Fruit Drinks                   | 12,461                                  | 4,777,911,066  | 2,004,096,826                         | 2,773,814,240                           | 2,593,355,892         | 916,523,232           | 993,032,961   | 274,998,981     | 3,202,210,937  | 1,093,740,577             | 228,409,556 | 253,549,996 |
| Ice Cream                      | 13,137                                  | 9,072,321,584  | 3,482,500,346                         | 5,589,821,238                           | 6,483,084,283         | 735,257,439           | 1,286,589,384 | 567,390,478     | 5,623,743,226  | 2,397,040,460             | 542,215,425 | 509,322,473 |
| Macaroni & Cheese Mix          | 10,775                                  | 1,395,934,942  | 581,935,487                           | 813,999,455                             | 1,041,127,970         | 91,705,407            | 188,809,906   | 74,291,659      | 844,273,743    | 386,579,822               | 83,729,458  | 81,351,919  |
| Frozen Pizza                   | 11,009                                  | 1,599,660,363  | 667,529,057                           | 932,131,306                             | 1,170,538,921         | 131,831,366           | 219,415,310   | 77,874,765      | 907,394,864    | 478,108,611               | 114,876,695 | 99,280,193  |
| Potato Chips                   | 12,341                                  | 3,839,433,960  | 1,507,160,540                         | 2,332,273,420                           | 2,700,193,025         | 391,652,088           | 518,731,092   | 228,857,755     | 2,297,739,828  | 1,065,657,422             | 257,658,565 | 218,378,145 |
| RTE Cereal                     | 13,518                                  | 16,120,096,372 | 6,239,455,021                         | 9,880,641,351                           | 11,292,272,213        | 1,428,294,084         | 2,527,081,378 | 872,448,697     | 10,012,900,372 | 4,266,074,866             | 928,779,552 | 912,341,582 |
| Tortilla Chips and Other Chips | 13,427                                  | 6,465,872,608  | 2,316,545,535                         | 4,149,327,073                           | 4,579,693,812         | 509,220,311           | 1,024,280,007 | 352,678,478     | 3,877,617,170  | 1,817,127,378             | 395,807,049 | 375,321,011 |
| Yeast Breads                   | 13,669                                  | 9,278,137,478  | 3,707,640,784                         | 5,570,496,694                           | 6,352,847,137         | 856,090,922           | 1,478,847,907 | 590,351,512     | 5,737,669,856  | 2,422,862,471             | 584,576,636 | 533,028,515 |
| Yogurt                         | 12,619                                  | 2,715,118,283  | 811,924,345                           | 1,903,193,938                           | 1,954,198,924         | 178,803,309           | 406,920,271   | 175,195,780     | 1,751,040,505  | 697,946,634               | 135,359,596 | 130,771,548 |

Potential Improvements from Reformulation of All 12 "1-Star" Products by Demographic Group for Consumer Network Households with Children (Weighted), 2014

|                                 | All Households     | Low Income (<185%<br>of Poverty Line) | High Income (>185%<br>of Poverty Line) | Non-Hispanic White | Non-Hispanic Black | Hispanic          | Asian and Other | Urban              | Part Urban<br>/Part Rural | Rural            | Unspecified      |
|---------------------------------|--------------------|---------------------------------------|----------------------------------------|--------------------|--------------------|-------------------|-----------------|--------------------|---------------------------|------------------|------------------|
| <b>Calories</b>                 |                    |                                       |                                        |                    |                    |                   |                 |                    |                           |                  |                  |
| Baseline (2014 average product) | 10,496,414,932,914 | 3,936,944,951,955                     | 6,559,469,980,947                      | 7,347,778,684,405  | 939,201,976,028    | 1,600,365,052,262 | 609,069,220,022 | 6,490,897,175,344  | 2,785,999,161,798         | 629,057,133,321  | 590,461,462,308  |
| Reformulated healthier product  | 9,644,033,468,524  | 3,607,443,512,090                     | 6,036,589,956,425                      | 6,792,814,883,071  | 834,618,607,089    | 1,458,287,842,272 | 558,312,135,883 | 5,945,217,967,629  | 2,571,983,517,730         | 582,727,176,967  | 544,104,806,059  |
| Total change                    | -852,381,464,390   | -329,501,439,865                      | -522,880,024,522                       | -554,963,801,334   | -104,583,368,939   | -142,077,209,990  | -50,757,084,139 | -545,679,207,715   | -214,015,644,068          | -46,329,956,354  | -46,356,656,249  |
| Baseline per AE per day         | 220.23             | 218.58                                | 221.24                                 | 239.73             | 192.49             | 184.96            | 175.13          | 215.63             | 229.28                    | 233.06           | 218.1            |
| Reformulated per AE per day     | 202.35             | 200.29                                | 203.6                                  | 221.62             | 171.06             | 168.54            | 160.54          | 197.5              | 211.67                    | 215.89           | 200.97           |
| Change per AE per day           | -17.88             | -18.29                                | -17.64                                 | -18.11             | -21.43             | -16.42            | -14.59          | -18.13             | -17.61                    | -17.16           | -17.12           |
| Percent change per AE per day   | -8.12%             | -8.37%                                | -7.97%                                 | -7.55%             | -11.13%            | -8.88%            | -8.33%          | -8.41%             | -7.68%                    | -7.36%           | -7.85%           |
| <b>Saturated Fat (g)</b>        |                    |                                       |                                        |                    |                    |                   |                 |                    |                           |                  |                  |
| Baseline (2014 average product) | 107,245,204,866    | 39,991,514,682                        | 67,253,690,183                         | 76,150,659,649     | 9,047,616,297      | 15,757,884,434    | 6,289,044,480   | 65,843,042,185     | 28,762,111,134            | 6,568,838,856    | 6,071,212,689    |
| Reformulated healthier product  | 52,074,905,680     | 19,215,628,130                        | 32,859,277,549                         | 37,192,670,921     | 4,274,883,150      | 7,611,891,133     | 2,995,460,473   | 31,831,253,256     | 14,102,771,592            | 3,184,288,761    | 2,956,592,069    |
| Total change                    | -55,170,299,186    | -20,775,886,552                       | -34,394,412,634                        | -38,957,988,729    | -4,772,733,147     | -8,145,993,301    | -3,293,584,007  | -34,011,788,929    | -14,659,339,542           | -3,384,550,095   | -3,114,620,620   |
| Baseline per AE per day         | 2.25               | 2.22                                  | 2.27                                   | 2.48               | 1.85               | 1.82              | 1.81            | 2.19               | 2.37                      | 2.43             | 2.24             |
| Reformulated per AE per day     | 1.09               | 1.07                                  | 1.11                                   | 1.21               | 0.88               | 0.88              | 0.86            | 1.06               | 1.16                      | 1.18             | 1.09             |
| Change per AE per day           | -1.16              | -1.15                                 | -1.16                                  | -1.27              | -0.98              | -0.94             | -0.95           | -1.13              | -1.21                     | -1.25            | -1.15            |
| Percent change per AE per day   | -51.56%            | -51.80%                               | -51.10%                                | -51.21%            | -52.97%            | -51.65%           | -52.49%         | -51.60%            | -51.05%                   | -51.44%          | -51.34%          |
| <b>Sugars (g)</b>               |                    |                                       |                                        |                    |                    |                   |                 |                    |                           |                  |                  |
| Baseline (2014 average product) | 608,088,386,344    | 229,310,620,322                       | 378,777,766,015                        | 411,577,632,659    | 62,797,821,726     | 97,928,904,583    | 35,784,027,391  | 383,856,289,919    | 156,165,398,577           | 34,507,074,310   | 33,559,623,529   |
| Reformulated healthier product  | 355,972,881,626    | 132,051,930,198                       | 223,920,951,420                        | 246,419,746,234    | 32,943,112,194     | 55,826,089,099    | 20,783,934,109  | 223,000,830,672    | 92,661,332,937            | 20,505,846,472   | 19,804,871,537   |
| Total change                    | -252,115,504,717   | -97,258,690,124                       | -154,856,814,594                       | -165,157,886,425   | -29,854,709,532    | -42,102,815,483   | -15,000,093,282 | -160,855,459,247   | -63,504,065,640           | -14,001,227,838  | -13,754,751,992  |
| Baseline per AE per day         | 12.76              | 12.73                                 | 12.78                                  | 13.43              | 12.87              | 11.32             | 10.29           | 12.75              | 12.85                     | 12.78            | 12.40            |
| Reformulated per AE per day     | 7.47               | 7.33                                  | 7.55                                   | 8.04               | 6.75               | 6.45              | 5.98            | 7.41               | 7.63                      | 7.60             | 7.32             |
| Change per AE per day           | -5.29              | -5.40                                 | -5.22                                  | -5.39              | -6.12              | -4.87             | -4.31           | -5.34              | -5.23                     | -5.19            | -5.08            |
| Percent change per AE per day   | -41.46%            | -42.42%                               | -40.85%                                | -40.13%            | -47.55%            | -43.02%           | -41.89%         | -41.88%            | -40.70%                   | -40.61%          | -40.97%          |
| <b>Sodium (mg)</b>              |                    |                                       |                                        |                    |                    |                   |                 |                    |                           |                  |                  |
| Baseline (2014 average product) | 12,641,485,345,295 | 4,792,258,344,319                     | 7,849,227,001,081                      | 8,930,049,686,503  | 1,086,361,942,485  | 1,900,603,741,825 | 724,469,973,841 | 7,749,354,077,654  | 3,400,987,849,821         | 773,440,377,083  | 717,703,040,633  |
| Reformulated healthier product  | 10,861,473,658,955 | 4,131,340,660,492                     | 6,730,132,998,558                      | 7,674,386,546,652  | 929,077,323,290    | 1,631,843,692,245 | 626,166,096,268 | 6,666,337,892,703  | 2,914,688,965,233         | 664,214,210,755  | 616,232,590,184  |
| Total change                    | -1,780,011,686,340 | -660,917,683,828                      | -1,119,094,002,523                     | -1,255,663,139,851 | -157,284,619,195   | -268,760,049,580  | -98,303,877,573 | -1,083,016,184,951 | -486,298,884,588          | -109,226,166,328 | -101,470,450,449 |
| Baseline per AE per day         | 265.24             | 266.07                                | 264.74                                 | 291.35             | 222.65             | 219.66            | 208.31          | 257.43             | 279.89                    | 286.55           | 265.10           |
| Reformulated per AE per day     | 227.89             | 229.38                                | 226.99                                 | 250.38             | 190.42             | 188.60            | 180.05          | 221.45             | 239.87                    | 246.08           | 227.62           |
| Change per AE per day           | -37.35             | -36.69                                | -37.74                                 | -40.97             | -32.24             | -31.06            | -28.27          | -35.98             | -40.02                    | -40.47           | -37.48           |
| Percent change per AE per day   | -14.08%            | -13.79%                               | -14.26%                                | -14.06%            | -14.48%            | -14.14%           | -13.57%         | -13.98%            | -14.30%                   | -14.12%          | -14.14%          |
| <b>Dietary Fiber (g)</b>        |                    |                                       |                                        |                    |                    |                   |                 |                    |                           |                  |                  |
| Baseline (2014 average product) | 104,860,802,698    | 39,030,706,077                        | 65,830,096,619                         | 73,966,773,952     | 8,907,125,625      | 15,930,032,993    | 6,056,870,125   | 64,786,293,812     | 27,855,144,310            | 6,274,289,575    | 5,945,074,998    |
| Reformulated healthier product  | 190,550,087,728    | 70,882,854,872                        | 119,667,232,854                        | 134,589,695,118    | 16,132,167,280     | 28,732,578,437    | 11,095,646,890  | 117,706,453,954    | 50,649,529,249            | 11,432,238,007   | 10,761,866,515   |
| Total change                    | 85,689,285,031     | 31,852,148,795                        | 53,837,136,235                         | 60,622,921,166     | 7,225,041,655      | 12,802,545,444    | 5,038,776,765   | 52,920,160,142     | 22,794,384,938            | 5,157,948,432    | 4,816,791,517    |
| Baseline per AE per day         | 2.20               | 2.17                                  | 2.22                                   | 2.41               | 1.83               | 1.84              | 1.74            | 2.15               | 2.29                      | 2.32             | 2.20             |
| Reformulated per AE per day     | 4.00               | 3.94                                  | 4.04                                   | 4.39               | 3.31               | 3.32              | 3.19            | 3.91               | 4.17                      | 4.24             | 3.98             |
| Change per AE per day           | 1.80               | 1.77                                  | 1.82                                   | 1.98               | 1.48               | 1.48              | 1.45            | 1.76               | 1.88                      | 1.91             | 1.78             |
| Percent change per AE per day   | 81.82%             | 81.57%                                | 81.98%                                 | 82.16%             | 80.87%             | 80.43%            | 83.33%          | 81.86%             | 82.10%                    | 82.33%           | 80.91%           |

Potential Improvements from Reformulation of All 12 "Max-Star" Products by Demographic Group for Consumer Network Households with Children (Weighted), 2014

|                                 | All Households     | Low Income (<185%<br>of Poverty Line) | High Income (>185%<br>of Poverty Line) | Non-Hispanic White | Non-Hispanic Black | Hispanic          | Asian and Other  | Urban              | Part Urban<br>/Part Rural | Rural            | Unspecified      |
|---------------------------------|--------------------|---------------------------------------|----------------------------------------|--------------------|--------------------|-------------------|------------------|--------------------|---------------------------|------------------|------------------|
| <b>Calories</b>                 |                    |                                       |                                        |                    |                    |                   |                  |                    |                           |                  |                  |
| Baseline (2014 average product) | 10,496,414,932,914 | 3,936,944,951,955                     | 6,559,469,980,947                      | 7,347,778,684,405  | 939,201,976,028    | 1,600,365,052,262 | 609,069,220,022  | 6,490,897,175,344  | 2,785,999,161,798         | 629,057,133,321  | 590,461,462,308  |
| Reformulated healthier product  | 6,548,911,159,308  | 2,476,592,344,170                     | 4,072,318,815,275                      | 4,632,942,048,722  | 554,782,364,030    | 985,312,120,385   | 375,874,625,949  | 4,037,598,551,175  | 1,751,296,339,112         | 392,193,861,590  | 367,822,407,431  |
| Total change                    | -3,947,503,773,606 | -1,460,352,607,785                    | -2,487,151,165,672                     | -2,714,836,635,683 | -384,419,611,997   | -615,052,931,877  | -233,194,594,072 | -2,453,298,624,169 | -1,034,702,822,686        | -236,863,271,731 | -222,639,054,877 |
| Baseline per AE per day         | 220.23             | 218.58                                | 221.24                                 | 239.73             | 192.49             | 184.96            | 175.13           | 215.63             | 229.28                    | 233.06           | 218.10           |
| Reformulated per AE per day     | 137.41             | 137.50                                | 137.35                                 | 151.15             | 113.70             | 113.88            | 108.08           | 134.13             | 144.13                    | 145.30           | 135.86           |
| Change per AE per day           | -82.83             | -81.08                                | -83.89                                 | -88.57             | -78.79             | -71.09            | -67.05           | -81.50             | -85.15                    | -87.75           | -82.24           |
| Percent change per AE per day   | -37.61%            | -37.09%                               | -37.92%                                | -36.95%            | -40.93%            | -38.44%           | -38.29%          | -37.80%            | -37.14%                   | -37.65%          | -37.71%          |
| <b>Saturated Fat (g)</b>        |                    |                                       |                                        |                    |                    |                   |                  |                    |                           |                  |                  |
| Baseline (2014 average product) | 107,245,204,866    | 39,991,514,682                        | 67,253,690,183                         | 76,150,659,649     | 9,047,616,297      | 15,757,884,434    | 6,289,044,480    | 65,843,042,185     | 28,762,111,134            | 6,568,838,856    | 6,071,212,689    |
| Reformulated healthier product  | 29,483,350,623     | 11,340,713,875                        | 18,142,636,749                         | 21,273,916,974     | 2,351,714,229      | 4,205,862,153     | 1,651,857,263    | 17,809,018,909     | 8,131,320,631             | 1,848,203,907    | 1,694,807,176    |
| Total change                    | -77,761,854,243    | -28,650,800,807                       | -49,111,053,434                        | -54,876,742,676    | -6,695,902,069     | -11,552,022,281   | -4,637,187,217   | -48,034,023,276    | -20,630,790,503           | -4,720,634,949   | -4,376,405,513   |
| Baseline per AE per day         | 2.25               | 2.22                                  | 2.27                                   | 2.48               | 1.85               | 1.82              | 1.81             | 2.19               | 2.37                      | 2.43             | 2.24             |
| Reformulated per AE per day     | 0.62               | 0.63                                  | 0.61                                   | 0.69               | 0.48               | 0.49              | 0.47             | 0.59               | 0.67                      | 0.68             | 0.63             |
| Change per AE per day           | -1.63              | -1.59                                 | -1.66                                  | -1.79              | -1.37              | -1.34             | -1.33            | -1.60              | -1.70                     | -1.75            | -1.62            |
| Percent change per AE per day   | -72.44%            | -71.62%                               | -73.13%                                | -72.18%            | -74.05%            | -73.63%           | -73.48%          | -73.06%            | -71.73%                   | -72.02%          | -72.32%          |
| <b>Sugars (g)</b>               |                    |                                       |                                        |                    |                    |                   |                  |                    |                           |                  |                  |
| Baseline (2014 average product) | 608,088,386,344    | 229,310,620,322                       | 378,777,766,015                        | 411,577,632,659    | 62,797,821,726     | 97,928,904,583    | 35,784,027,391   | 383,856,289,919    | 156,165,398,577           | 34,507,074,310   | 33,559,623,529   |
| Reformulated healthier product  | 155,580,078,495    | 59,142,244,018                        | 96,437,834,477                         | 106,049,042,557    | 15,500,474,150     | 24,765,133,475    | 9,265,428,318    | 97,740,722,469     | 40,414,795,558            | 8,852,903,526    | 8,571,656,943    |
| Total change                    | -452,508,307,849   | -170,168,376,304                      | -282,339,931,537                       | -305,528,590,102   | -47,297,347,577    | -73,163,771,107   | -26,518,599,072  | -286,115,567,450   | -115,750,603,019          | -25,654,170,784  | -24,987,966,586  |
| Baseline per AE per day         | 12.76              | 12.73                                 | 12.78                                  | 13.43              | 12.87              | 11.32             | 10.29            | 12.75              | 12.85                     | 12.78            | 12.40            |
| Reformulated per AE per day     | 3.26               | 3.28                                  | 3.25                                   | 3.46               | 3.18               | 2.86              | 2.66             | 3.25               | 3.33                      | 3.28             | 3.17             |
| Change per AE per day           | -9.49              | -9.45                                 | -9.52                                  | -9.97              | -9.69              | -8.46             | -7.63            | -9.50              | -9.53                     | -9.50            | -9.23            |
| Percent change per AE per day   | -74.37%            | -74.23%                               | -74.49%                                | -74.24%            | -75.29%            | -74.73%           | -74.15%          | -74.51%            | -74.16%                   | -74.33%          | -74.44%          |
| <b>Sodium (mg)</b>              |                    |                                       |                                        |                    |                    |                   |                  |                    |                           |                  |                  |
| Baseline (2014 average product) | 12,641,485,345,295 | 4,792,258,344,319                     | 7,849,227,001,081                      | 8,930,049,686,503  | 1,086,361,942,485  | 1,900,603,741,825 | 724,469,973,841  | 7,749,354,077,654  | 3,400,987,849,821         | 773,440,377,083  | 717,703,040,633  |
| Reformulated healthier product  | 6,816,077,053,351  | 2,624,350,719,214                     | 4,191,726,334,259                      | 4,840,496,843,698  | 568,698,716,695    | 1,015,320,556,890 | 391,560,935,569  | 4,168,631,957,673  | 1,841,081,671,481         | 418,575,483,529  | 387,787,940,668  |
| Total change                    | -5,825,408,291,944 | -2,167,907,625,105                    | -3,657,500,666,822                     | -4,089,552,842,804 | -517,663,225,790   | -885,283,184,936  | -332,909,038,272 | -3,580,722,119,981 | -1,559,906,178,340        | -354,864,893,554 | -329,915,099,966 |
| Baseline per AE per day         | 265.24             | 266.07                                | 264.74                                 | 291.35             | 222.65             | 219.66            | 208.31           | 257.43             | 279.89                    | 286.55           | 265.10           |
| Reformulated per AE per day     | 143.01             | 145.71                                | 141.38                                 | 157.92             | 116.56             | 117.35            | 112.59           | 138.48             | 151.52                    | 155.08           | 143.24           |
| Change per AE per day           | -122.23            | -120.36                               | -123.36                                | -133.42            | -106.10            | -102.32           | -95.72           | -118.95            | -128.38                   | -131.47          | -121.86          |
| Percent change per AE per day   | -46.08%            | -45.24%                               | -46.60%                                | -45.79%            | -47.65%            | -46.58%           | -45.95%          | -46.21%            | -45.87%                   | -45.88%          | -45.97%          |
| <b>Dietary Fiber (g)</b>        |                    |                                       |                                        |                    |                    |                   |                  |                    |                           |                  |                  |
| Baseline (2014 average product) | 104,860,802,698    | 39,030,706,077                        | 65,830,096,619                         | 73,966,773,952     | 8,907,125,625      | 15,930,032,993    | 6,056,870,125    | 64,786,293,812     | 27,855,144,310            | 6,274,289,575    | 5,945,074,998    |
| Reformulated healthier product  | 210,279,346,040    | 78,644,774,270                        | 131,634,571,774                        | 148,752,594,716    | 17,489,766,463     | 31,691,352,871    | 12,345,631,989   | 129,854,931,699    | 56,055,479,114            | 12,600,002,351   | 11,768,932,876   |
| Total change                    | 105,418,543,342    | 39,614,068,193                        | 65,804,475,155                         | 74,785,820,764     | 8,582,640,837      | 15,761,319,878    | 6,288,761,864    | 65,068,637,887     | 28,200,334,803            | 6,325,712,777    | 5,823,857,879    |
| Baseline per AE per day         | 2.20               | 2.17                                  | 2.22                                   | 2.41               | 1.83               | 1.84              | 1.74             | 2.15               | 2.29                      | 2.32             | 2.20             |
| Reformulated per AE per day     | 4.41               | 4.37                                  | 4.44                                   | 4.85               | 3.58               | 3.66              | 3.55             | 4.31               | 4.61                      | 4.67             | 4.35             |
| Change per AE per day           | 2.21               | 2.20                                  | 2.22                                   | 2.44               | 1.76               | 1.82              | 1.81             | 2.16               | 2.32                      | 2.34             | 2.15             |
| Percent change per AE per day   | 100.45%            | 101.38%                               | 100.00%                                | 101.24%            | 96.17%             | 98.91%            | 104.02%          | 100.47%            | 101.31%                   | 100.86%          | 97.73%           |

Potential Improvements from Reformulation of [Cereal/Granola Bars](#) by Demographic Group for Consumer Network Households with Children (Weighted), 2014

|                                 | All Households  | Low Income (<185%<br>of Poverty Line) | High Income (>185%<br>of Poverty Line) | Non-Hispanic White | Non-Hispanic Black | Hispanic        | Asian and Other | Urban           | Part Urban<br>/Part Rural | Rural          | Unspecified    |
|---------------------------------|-----------------|---------------------------------------|----------------------------------------|--------------------|--------------------|-----------------|-----------------|-----------------|---------------------------|----------------|----------------|
| <b>1-Star Targets</b>           |                 |                                       |                                        |                    |                    |                 |                 |                 |                           |                |                |
| <b>Calories</b>                 |                 |                                       |                                        |                    |                    |                 |                 |                 |                           |                |                |
| Baseline (2014 average product) | 557,356,377,623 | 156,353,402,668                       | 401,002,974,813                        | 408,531,305,063    | 35,727,002,172     | 79,530,228,199  | 33,567,842,190  | 354,254,886,307 | 141,534,250,684           | 29,308,102,651 | 32,259,137,839 |
| Reformulated healthier product  | 539,804,917,166 | 151,429,747,580                       | 388,375,169,448                        | 395,666,428,417    | 34,601,939,122     | 77,025,777,346  | 32,510,772,282  | 343,099,204,093 | 137,077,258,885           | 28,385,174,296 | 31,243,279,754 |
| Total change                    | -17,551,460,457 | -4,923,655,088                        | -12,627,805,365                        | -12,864,876,647    | -1,125,063,050     | -2,504,450,853  | -1,057,069,908  | -11,155,682,214 | -4,456,991,799            | -922,928,355   | -1,015,858,085 |
| Baseline per AE per day         | 11.69           | 8.68                                  | 13.53                                  | 13.33              | 7.32               | 9.19            | 9.65            | 11.77           | 11.65                     | 10.86          | 11.92          |
| Reformulated per AE per day     | 11.33           | 8.41                                  | 13.10                                  | 12.91              | 7.09               | 8.90            | 9.35            | 11.40           | 11.28                     | 10.52          | 11.54          |
| Change per AE per day           | -0.37           | -0.27                                 | -0.43                                  | -0.42              | -0.23              | -0.29           | -0.30           | -0.37           | -0.37                     | -0.34          | -0.38          |
| Percent change per AE per day   | -3.17%          | -3.11%                                | -3.18%                                 | -3.15%             | -3.14%             | -3.16%          | -3.11%          | -3.14%          | -3.18%                    | -3.13%         | -3.19%         |
| <b>Saturated Fat (g)</b>        |                 |                                       |                                        |                    |                    |                 |                 |                 |                           |                |                |
| Baseline (2014 average product) | 7,410,616,637   | 2,078,876,593                         | 5,331,740,043                          | 5,431,836,806      | 475,026,621        | 1,057,434,805   | 446,318,406     | 4,710,176,935   | 1,881,840,982             | 389,680,861    | 428,917,858    |
| Reformulated healthier product  | 5,070,421,910   | 1,422,389,248                         | 3,648,032,661                          | 3,716,519,920      | 325,018,214        | 723,508,024     | 305,375,751     | 3,222,752,640   | 1,287,575,409             | 266,623,747    | 293,470,113    |
| Total change                    | -2,340,194,728  | -656,487,345                          | -1,683,707,382                         | -1,715,316,886     | -150,008,407       | -333,926,780    | -140,942,654    | -1,487,424,295  | -594,265,573              | -123,057,114   | -135,447,745   |
| Baseline per AE per day         | 0.16            | 0.12                                  | 0.18                                   | 0.18               | 0.10               | 0.12            | 0.13            | 0.16            | 0.15                      | 0.14           | 0.16           |
| Reformulated per AE per day     | 0.11            | 0.08                                  | 0.12                                   | 0.12               | 0.07               | 0.08            | 0.09            | 0.11            | 0.11                      | 0.10           | 0.11           |
| Change per AE per day           | -0.05           | -0.04                                 | -0.06                                  | -0.06              | -0.03              | -0.04           | -0.04           | -0.05           | -0.05                     | -0.05          | -0.05          |
| Percent change per AE per day   | -31.25%         | -33.33%                               | -33.33%                                | -33.33%            | -30.00%            | -33.33%         | -30.77%         | -31.25%         | -33.33%                   | -35.71%        | -31.25%        |
| <b>Sugars (g)</b>               |                 |                                       |                                        |                    |                    |                 |                 |                 |                           |                |                |
| Baseline (2014 average product) | 36,663,050,732  | 10,284,968,405                        | 26,378,082,318                         | 26,873,297,884     | 2,350,131,703      | 5,231,519,560   | 2,208,101,586   | 23,302,980,625  | 9,310,160,647             | 1,927,894,786  | 2,122,014,665  |
| Reformulated healthier product  | 31,592,628,823  | 8,862,579,158                         | 22,730,049,657                         | 23,156,777,964     | 2,025,113,489      | 4,508,011,535   | 1,902,725,834   | 20,080,227,985  | 8,022,585,238             | 1,661,271,039  | 1,828,544,552  |
| Total change                    | -5,070,421,910  | -1,422,389,248                        | -3,648,032,661                         | -3,716,519,920     | -325,018,214       | -723,508,024    | -305,375,751    | -3,222,752,640  | -1,287,575,409            | -266,623,747   | -293,470,113   |
| Baseline per AE per day         | 0.77            | 0.57                                  | 0.89                                   | 0.88               | 0.48               | 0.60            | 0.63            | 0.77            | 0.77                      | 0.71           | 0.78           |
| Reformulated per AE per day     | 0.66            | 0.49                                  | 0.77                                   | 0.76               | 0.42               | 0.52            | 0.55            | 0.67            | 0.66                      | 0.62           | 0.68           |
| Change per AE per day           | -0.11           | -0.08                                 | -0.12                                  | -0.12              | -0.07              | -0.08           | -0.09           | -0.11           | -0.11                     | -0.10          | -0.11          |
| Percent change per AE per day   | -14.29%         | -14.04%                               | -13.48%                                | -13.64%            | -14.58%            | -13.33%         | -14.29%         | -14.29%         | -14.29%                   | -14.08%        | -14.10%        |
| <b>Sodium (mg)</b>              |                 |                                       |                                        |                    |                    |                 |                 |                 |                           |                |                |
| Baseline (2014 average product) | 406,413,817,693 | 114,009,968,915                       | 292,403,848,674                        | 297,893,365,903    | 26,051,459,946     | 57,991,950,863  | 24,477,040,981  | 258,316,019,266 | 103,204,121,212           | 21,370,918,798 | 23,522,758,312 |
| Reformulated healthier product  | 313,976,125,953 | 88,078,718,788                        | 225,897,407,085                        | 230,138,348,899    | 20,126,127,886     | 44,801,843,037  | 18,909,806,132  | 199,562,759,606 | 79,730,631,071            | 16,510,162,795 | 18,172,572,401 |
| Total change                    | -92,437,691,740 | -25,931,250,128                       | -66,506,441,589                        | -67,755,017,005    | -5,925,332,061     | -13,190,107,826 | -5,567,234,849  | -58,753,259,660 | -23,473,490,141           | -4,860,756,003 | -5,350,185,912 |
| Baseline per AE per day         | 8.53            | 6.33                                  | 9.86                                   | 9.72               | 5.34               | 6.70            | 7.04            | 8.58            | 8.49                      | 7.92           | 8.69           |
| Reformulated per AE per day     | 6.59            | 4.89                                  | 7.62                                   | 7.51               | 4.12               | 5.18            | 5.44            | 6.63            | 6.56                      | 6.12           | 6.71           |
| Change per AE per day           | -1.94           | -1.44                                 | -2.24                                  | -2.21              | -1.21              | -1.52           | -1.60           | -1.95           | -1.93                     | -1.80          | -1.98          |
| Percent change per AE per day   | -22.74%         | -22.75%                               | -22.72%                                | -22.74%            | -22.66%            | -22.69%         | -22.73%         | -22.73%         | -22.73%                   | -22.73%        | -22.78%        |
| <b>Dietary Fiber (g)</b>        |                 |                                       |                                        |                    |                    |                 |                 |                 |                           |                |                |
| Baseline (2014 average product) | 10,140,843,820  | 2,844,778,495                         | 7,296,065,322                          | 7,433,039,840      | 650,036,429        | 1,447,016,048   | 610,751,502     | 6,445,505,279   | 2,575,150,817             | 533,247,494    | 586,940,227    |
| Reformulated healthier product  | 14,821,233,275  | 4,157,753,185                         | 10,663,480,086                         | 10,863,673,613     | 950,053,242        | 2,114,869,609   | 892,636,811     | 9,420,353,870   | 3,763,681,964             | 779,361,722    | 857,835,716    |
| Total change                    | 4,680,389,455   | 1,312,974,690                         | 3,367,414,764                          | 3,430,633,772      | 300,016,813        | 667,853,561     | 281,885,309     | 2,974,848,590   | 1,188,531,146             | 246,114,228    | 270,895,489    |
| Baseline per AE per day         | 0.21            | 0.16                                  | 0.25                                   | 0.24               | 0.13               | 0.17            | 0.18            | 0.21            | 0.21                      | 0.20           | 0.22           |
| Reformulated per AE per day     | 0.31            | 0.23                                  | 0.36                                   | 0.35               | 0.19               | 0.24            | 0.26            | 0.31            | 0.31                      | 0.29           | 0.32           |
| Change per AE per day           | 0.10            | 0.07                                  | 0.11                                   | 0.11               | 0.06               | 0.08            | 0.08            | 0.10            | 0.10                      | 0.09           | 0.10           |
| Percent change per AE per day   | 47.62%          | 43.75%                                | 44.00%                                 | 45.83%             | 46.15%             | 47.06%          | 44.44%          | 47.62%          | 47.62%                    | 45.00%         | 45.45%         |

Potential Improvements from Reformulation of [Cereal/Granola Bars](#) by Demographic Group for Consumer Network Households with Children (Weighted), 2014

|                                 | All Households  | Low Income (<185%<br>of Poverty Line) | High Income (>185%<br>of Poverty Line) | Non-Hispanic White | Non-Hispanic Black | Hispanic        | Asian and Other | Urban           | Part Urban<br>/Part Rural | Rural          | Unspecified    |
|---------------------------------|-----------------|---------------------------------------|----------------------------------------|--------------------|--------------------|-----------------|-----------------|-----------------|---------------------------|----------------|----------------|
| <b>2-Star Targets</b>           |                 |                                       |                                        |                    |                    |                 |                 |                 |                           |                |                |
| <b>Calories</b>                 |                 |                                       |                                        |                    |                    |                 |                 |                 |                           |                |                |
| Baseline (2014 average product) | 557,356,377,623 | 156,353,402,668                       | 401,002,974,813                        | 408,531,305,063    | 35,727,002,172     | 79,530,228,199  | 33,567,842,190  | 354,254,886,307 | 141,534,250,684           | 29,308,102,651 | 32,259,137,839 |
| Reformulated healthier product  | 558,916,507,442 | 156,791,060,898                       | 402,125,446,401                        | 409,674,849,654    | 35,827,007,776     | 79,752,846,052  | 33,661,803,959  | 355,246,502,504 | 141,930,427,733           | 29,390,140,727 | 32,349,436,335 |
| Total change                    | 1,560,129,818   | 437,658,230                           | 1,122,471,588                          | 1,143,544,591      | 100,005,604        | 222,617,854     | 93,961,770      | 991,616,197     | 396,177,049               | 82,038,076     | 90,298,496     |
| Baseline per AE per day         | 11.69           | 8.68                                  | 13.53                                  | 13.33              | 7.32               | 9.19            | 9.65            | 11.77           | 11.65                     | 10.86          | 11.92          |
| Reformulated per AE per day     | 11.73           | 8.71                                  | 13.56                                  | 13.37              | 7.34               | 9.22            | 9.68            | 11.80           | 11.68                     | 10.89          | 11.95          |
| Change per AE per day           | 0.03            | 0.02                                  | 0.04                                   | 0.04               | 0.02               | 0.03            | 0.03            | 0.03            | 0.03                      | 0.03           | 0.03           |
| Percent change per AE per day   | 0.26%           | 0.23%                                 | 0.30%                                  | 0.30%              | 0.27%              | 0.33%           | 0.31%           | 0.25%           | 0.26%                     | 0.28%          | 0.25%          |
| <b>Saturated Fat (g)</b>        |                 |                                       |                                        |                    |                    |                 |                 |                 |                           |                |                |
| Baseline (2014 average product) | 7,410,616,637   | 2,078,876,593                         | 5,331,740,043                          | 5,431,836,806      | 475,026,621        | 1,057,434,805   | 446,318,406     | 4,710,176,935   | 1,881,840,982             | 389,680,861    | 428,917,858    |
| Reformulated healthier product  | 4,290,357,001   | 1,203,560,133                         | 3,086,796,867                          | 3,144,747,625      | 275,015,412        | 612,199,097     | 258,394,866     | 2,726,944,541   | 1,089,486,884             | 225,604,709    | 248,320,865    |
| Total change                    | -3,120,259,637  | -875,316,460                          | -2,244,943,176                         | -2,287,089,182     | -200,011,209       | -445,235,707    | -187,923,539    | -1,983,232,394  | -792,354,098              | -164,076,152   | -180,596,993   |
| Baseline per AE per day         | 0.16            | 0.12                                  | 0.18                                   | 0.18               | 0.10               | 0.12            | 0.13            | 0.16            | 0.15                      | 0.14           | 0.16           |
| Reformulated per AE per day     | 0.09            | 0.07                                  | 0.10                                   | 0.10               | 0.06               | 0.07            | 0.07            | 0.09            | 0.09                      | 0.08           | 0.09           |
| Change per AE per day           | -0.07           | -0.05                                 | -0.08                                  | -0.07              | -0.04              | -0.05           | -0.05           | -0.07           | -0.07                     | -0.06          | -0.07          |
| Percent change per AE per day   | -43.75%         | -41.67%                               | -44.44%                                | -38.89%            | -40.00%            | -41.67%         | -38.46%         | -43.75%         | -46.67%                   | -42.86%        | -43.75%        |
| <b>Sugars (g)</b>               |                 |                                       |                                        |                    |                    |                 |                 |                 |                           |                |                |
| Baseline (2014 average product) | 36,663,050,732  | 10,284,968,405                        | 26,378,082,318                         | 26,873,297,884     | 2,350,131,703      | 5,231,519,560   | 2,208,101,586   | 23,302,980,625  | 9,310,160,647             | 1,927,894,786  | 2,122,014,665  |
| Reformulated healthier product  | 23,011,914,821  | 6,455,458,893                         | 16,556,455,923                         | 16,867,282,714     | 1,475,082,665      | 3,283,613,341   | 1,385,936,102   | 14,626,338,903  | 5,843,611,470             | 1,210,061,621  | 1,331,902,822  |
| Total change                    | -13,651,135,911 | -3,829,509,513                        | -9,821,626,395                         | -10,006,015,170    | -875,049,039       | -1,947,906,219  | -822,165,484    | -8,676,641,722  | -3,466,549,177            | -717,833,165   | -790,111,844   |
| Baseline per AE per day         | 0.77            | 0.57                                  | 0.89                                   | 0.88               | 0.48               | 0.60            | 0.63            | 0.77            | 0.77                      | 0.71           | 0.78           |
| Reformulated per AE per day     | 0.48            | 0.36                                  | 0.56                                   | 0.55               | 0.30               | 0.38            | 0.40            | 0.49            | 0.48                      | 0.45           | 0.49           |
| Change per AE per day           | -0.29           | -0.21                                 | -0.33                                  | -0.33              | -0.18              | -0.23           | -0.24           | -0.29           | -0.29                     | -0.27          | -0.29          |
| Percent change per AE per day   | -37.66%         | -36.84%                               | -37.08%                                | -37.50%            | -37.50%            | -38.33%         | -38.10%         | -37.66%         | -37.66%                   | -38.03%        | -37.18%        |
| <b>Sodium (mg)</b>              |                 |                                       |                                        |                    |                    |                 |                 |                 |                           |                |                |
| Baseline (2014 average product) | 406,413,817,693 | 114,009,968,915                       | 292,403,848,674                        | 297,893,365,903    | 26,051,459,946     | 57,991,950,863  | 24,477,040,981  | 258,316,019,266 | 103,204,121,212           | 21,370,918,798 | 23,522,758,312 |
| Reformulated healthier product  | 313,196,061,044 | 87,859,889,673                        | 225,336,171,291                        | 229,566,576,603    | 20,076,125,083     | 44,690,534,110  | 18,862,825,247  | 199,066,951,508 | 79,532,542,547            | 16,469,143,757 | 18,127,423,152 |
| Total change                    | -93,217,756,649 | -26,150,079,243                       | -67,067,677,383                        | -68,326,789,300    | -5,975,334,863     | -13,301,416,753 | -5,614,215,734  | -59,249,067,759 | -23,671,578,666           | -4,901,775,041 | -5,395,335,160 |
| Baseline per AE per day         | 8.53            | 6.33                                  | 9.86                                   | 9.72               | 5.34               | 6.70            | 7.04            | 8.58            | 8.49                      | 7.92           | 8.69           |
| Reformulated per AE per day     | 6.57            | 4.88                                  | 7.60                                   | 7.49               | 4.11               | 5.17            | 5.42            | 6.61            | 6.55                      | 6.10           | 6.70           |
| Change per AE per day           | -1.96           | -1.45                                 | -2.26                                  | -2.23              | -1.22              | -1.54           | -1.61           | -1.97           | -1.95                     | -1.82          | -1.99          |
| Percent change per AE per day   | -22.98%         | -22.91%                               | -22.92%                                | -22.94%            | -22.85%            | -22.99%         | -22.87%         | -22.96%         | -22.97%                   | -22.98%        | -22.90%        |
| <b>Dietary Fiber (g)</b>        |                 |                                       |                                        |                    |                    |                 |                 |                 |                           |                |                |
| Baseline (2014 average product) | 10,140,843,820  | 2,844,778,495                         | 7,296,065,322                          | 7,433,039,840      | 650,036,429        | 1,447,016,048   | 610,751,502     | 6,445,505,279   | 2,575,150,817             | 533,247,494    | 586,940,227    |
| Reformulated healthier product  | 16,381,363,093  | 4,595,411,415                         | 11,785,951,674                         | 12,007,218,203     | 1,050,058,846      | 2,337,487,463   | 986,598,581     | 10,411,970,066  | 4,159,859,012             | 861,399,798    | 948,134,212    |
| Total change                    | 6,240,519,274   | 1,750,632,920                         | 4,489,886,352                          | 4,574,178,363      | 400,022,418        | 890,471,414     | 375,847,078     | 3,966,464,787   | 1,584,708,195             | 328,152,304    | 361,193,986    |
| Baseline per AE per day         | 0.21            | 0.16                                  | 0.25                                   | 0.24               | 0.13               | 0.17            | 0.18            | 0.21            | 0.21                      | 0.20           | 0.22           |
| Reformulated per AE per day     | 0.34            | 0.26                                  | 0.40                                   | 0.39               | 0.22               | 0.27            | 0.28            | 0.35            | 0.34                      | 0.32           | 0.35           |
| Change per AE per day           | 0.13            | 0.10                                  | 0.15                                   | 0.15               | 0.08               | 0.10            | 0.11            | 0.13            | 0.13                      | 0.12           | 0.13           |
| Percent change per AE per day   | 61.90%          | 62.50%                                | 60.00%                                 | 62.50%             | 61.54%             | 58.82%          | 61.11%          | 61.90%          | 61.90%                    | 60.00%         | 59.09%         |



Potential Improvements from Reformulation of [Cookies & Brownies](#) by Demographic Group for Consumer Network Households with Children (Weighted), 2014

|                                 | All Households    | Low Income (<185%<br>of Poverty Line) | High Income (>185%<br>of Poverty Line) | Non-Hispanic White | Non-Hispanic Black | Hispanic        | Asian and Other | Urban           | Part Urban<br>/Part Rural | Rural          | Unspecified    |
|---------------------------------|-------------------|---------------------------------------|----------------------------------------|--------------------|--------------------|-----------------|-----------------|-----------------|---------------------------|----------------|----------------|
| <b>1-Star Targets</b>           |                   |                                       |                                        |                    |                    |                 |                 |                 |                           |                |                |
| <b>Calories</b>                 |                   |                                       |                                        |                    |                    |                 |                 |                 |                           |                |                |
| Baseline (2014 average product) | 1,255,910,200,027 | 479,671,141,003                       | 776,239,059,025                        | 853,884,973,711    | 126,091,070,846    | 202,453,232,533 | 73,480,922,938  | 778,997,491,746 | 326,949,778,201           | 79,496,371,873 | 70,466,558,208 |
| Reformulated healthier product  | 1,177,588,580,803 | 449,757,680,265                       | 727,830,900,538                        | 800,634,626,854    | 118,227,724,535    | 189,827,755,816 | 68,898,473,599  | 730,417,310,676 | 306,560,393,647           | 74,538,784,485 | 66,072,091,995 |
| Total change                    | -78,321,619,224   | -29,913,460,738                       | -48,408,158,487                        | -53,250,346,857    | -7,863,346,311     | -12,625,476,717 | -4,582,449,340  | -48,580,181,070 | -20,389,384,554           | -4,957,587,388 | -4,394,466,213 |
| Baseline per AE per day         | 26.35             | 26.63                                 | 26.18                                  | 27.86              | 25.84              | 23.40           | 21.13           | 25.88           | 26.91                     | 29.45          | 26.03          |
| Reformulated per AE per day     | 24.71             | 24.97                                 | 24.55                                  | 26.12              | 24.23              | 21.94           | 19.81           | 24.26           | 25.23                     | 27.62          | 24.40          |
| Change per AE per day           | -1.64             | -1.66                                 | -1.63                                  | -1.74              | -1.61              | -1.46           | -1.32           | -1.61           | -1.68                     | -1.84          | -1.62          |
| Percent change per AE per day   | -6.22%            | -6.23%                                | -6.23%                                 | -6.25%             | -6.23%             | -6.24%          | -6.25%          | -6.22%          | -6.24%                    | -6.25%         | -6.22%         |
| <b>Saturated Fat (g)</b>        |                   |                                       |                                        |                    |                    |                 |                 |                 |                           |                |                |
| Baseline (2014 average product) | 22,114,339,546    | 8,446,153,620                         | 13,668,185,926                         | 15,035,392,054     | 2,220,238,958      | 3,564,840,485   | 1,293,868,049   | 13,716,757,008  | 5,757,002,698             | 1,399,789,380  | 1,240,790,460  |
| Reformulated healthier product  | 6,450,015,701     | 2,463,461,473                         | 3,986,554,228                          | 4,385,322,682      | 647,569,696        | 1,039,745,141   | 377,378,181     | 4,000,720,794   | 1,679,125,787             | 408,271,903    | 361,897,218    |
| Total change                    | -15,664,323,845   | -5,982,692,148                        | -9,681,631,697                         | -10,650,069,371    | -1,572,669,262     | -2,525,095,343  | -916,489,868    | -9,716,036,214  | -4,077,876,911            | -991,517,478   | -878,893,243   |
| Baseline per AE per day         | 0.46              | 0.47                                  | 0.46                                   | 0.49               | 0.46               | 0.41            | 0.37            | 0.46            | 0.47                      | 0.52           | 0.46           |
| Reformulated per AE per day     | 0.14              | 0.14                                  | 0.13                                   | 0.14               | 0.13               | 0.12            | 0.11            | 0.13            | 0.14                      | 0.15           | 0.13           |
| Change per AE per day           | -0.33             | -0.33                                 | -0.33                                  | -0.35              | -0.32              | -0.29           | -0.26           | -0.32           | -0.34                     | -0.37          | -0.32          |
| Percent change per AE per day   | -71.74%           | -70.21%                               | -71.74%                                | -71.43%            | -69.57%            | -70.73%         | -70.27%         | -69.57%         | -72.34%                   | -71.15%        | -69.57%        |
| <b>Sugars (g)</b>               |                   |                                       |                                        |                    |                    |                 |                 |                 |                           |                |                |
| Baseline (2014 average product) | 91,221,650,626    | 34,840,383,683                        | 56,381,266,943                         | 62,020,992,221     | 9,158,485,703      | 14,704,967,000  | 5,337,205,701   | 56,581,622,658  | 23,747,636,128            | 5,774,131,193  | 5,118,260,648  |
| Reformulated healthier product  | 57,128,710,493    | 21,819,230,185                        | 35,309,480,308                         | 38,841,429,472     | 5,735,617,309      | 9,209,171,252   | 3,342,492,459   | 35,434,955,604  | 14,872,256,969            | 3,616,122,565  | 3,205,375,355  |
| Total change                    | -34,092,940,133   | -13,021,153,498                       | -21,071,786,635                        | -23,179,562,749    | -3,422,868,394     | -5,495,795,747  | -1,994,713,242  | -21,146,667,054 | -8,875,379,159            | -2,158,008,628 | -1,912,885,293 |
| Baseline per AE per day         | 1.91              | 1.93                                  | 1.90                                   | 2.02               | 1.88               | 1.70            | 1.53            | 1.88            | 1.95                      | 2.14           | 1.89           |
| Reformulated per AE per day     | 1.20              | 1.21                                  | 1.19                                   | 1.27               | 1.18               | 1.06            | 0.96            | 1.18            | 1.22                      | 1.34           | 1.18           |
| Change per AE per day           | -0.72             | -0.72                                 | -0.71                                  | -0.76              | -0.70              | -0.64           | -0.57           | -0.70           | -0.73                     | -0.80          | -0.71          |
| Percent change per AE per day   | -37.70%           | -37.31%                               | -37.37%                                | -37.62%            | -37.23%            | -37.65%         | -37.25%         | -37.23%         | -37.44%                   | -37.38%        | -37.57%        |
| <b>Sodium (mg)</b>              |                   |                                       |                                        |                    |                    |                 |                 |                 |                           |                |                |
| Baseline (2014 average product) | 845,873,487,619   | 323,065,375,965                       | 522,808,111,654                        | 575,103,746,050    | 84,924,140,159     | 136,355,148,544 | 49,490,452,867  | 524,665,955,556 | 220,205,353,183           | 53,541,943,785 | 47,460,235,095 |
| Reformulated healthier product  | 745,437,528,850   | 284,705,761,608                       | 460,731,767,242                        | 506,818,007,140    | 74,840,554,889     | 120,164,831,342 | 43,614,135,478  | 462,369,017,478 | 194,058,965,932           | 47,184,567,018 | 41,824,978,423 |
| Total change                    | -100,435,958,770  | -38,359,614,358                       | -62,076,344,412                        | -68,285,738,910    | -10,083,585,269    | -16,190,317,202 | -5,876,317,388  | -62,296,938,078 | -26,146,387,252           | -6,357,376,768 | -5,635,256,673 |
| Baseline per AE per day         | 17.75             | 17.94                                 | 17.63                                  | 18.76              | 17.41              | 15.76           | 14.23           | 17.43           | 18.12                     | 19.84          | 17.53          |
| Reformulated per AE per day     | 15.64             | 15.81                                 | 15.54                                  | 16.54              | 15.34              | 13.89           | 12.54           | 15.36           | 15.97                     | 17.48          | 15.45          |
| Change per AE per day           | -2.11             | -2.13                                 | -2.09                                  | -2.23              | -2.07              | -1.87           | -1.69           | -2.07           | -2.15                     | -2.36          | -2.08          |
| Percent change per AE per day   | -11.89%           | -11.87%                               | -11.85%                                | -11.89%            | -11.89%            | -11.87%         | -11.88%         | -11.88%         | -11.87%                   | -11.90%        | -11.87%        |
| <b>Dietary Fiber (g)</b>        |                   |                                       |                                        |                    |                    |                 |                 |                 |                           |                |                |
| Baseline (2014 average product) | 6,450,015,701     | 2,463,461,473                         | 3,986,554,228                          | 4,385,322,682      | 647,569,696        | 1,039,745,141   | 377,378,181     | 4,000,720,794   | 1,679,125,787             | 408,271,903    | 361,897,218    |
| Reformulated healthier product  | 26,721,493,618    | 10,205,768,958                        | 16,515,724,660                         | 18,167,765,398     | 2,682,788,741      | 4,307,515,586   | 1,563,423,892   | 16,574,414,718  | 6,956,378,260             | 1,691,412,168  | 1,499,288,473  |
| Total change                    | 20,271,477,917    | 7,742,307,485                         | 12,529,170,432                         | 13,782,442,716     | 2,035,219,045      | 3,267,770,444   | 1,186,045,711   | 12,573,693,924  | 5,277,252,473             | 1,283,140,265  | 1,137,391,255  |
| Baseline per AE per day         | 0.14              | 0.14                                  | 0.13                                   | 0.14               | 0.13               | 0.12            | 0.11            | 0.13            | 0.14                      | 0.15           | 0.13           |
| Reformulated per AE per day     | 0.56              | 0.57                                  | 0.56                                   | 0.59               | 0.55               | 0.50            | 0.45            | 0.55            | 0.57                      | 0.63           | 0.55           |
| Change per AE per day           | 0.43              | 0.43                                  | 0.42                                   | 0.45               | 0.42               | 0.38            | 0.34            | 0.42            | 0.43                      | 0.48           | 0.42           |
| Percent change per AE per day   | 307.14%           | 307.14%                               | 323.08%                                | 321.43%            | 323.08%            | 316.67%         | 309.09%         | 323.08%         | 307.14%                   | 320.00%        | 323.08%        |

Potential Improvements from Reformulation of [Cookies & Brownies](#) by Demographic Group for Consumer Network Households with Children (Weighted), 2014

|                                 | All Households    | Low Income (<185%<br>of Poverty Line) | High Income (>185%<br>of Poverty Line) | Non-Hispanic White | Non-Hispanic Black | Hispanic        | Asian and Other | Urban           | Part Urban<br>/Part Rural | Rural          | Unspecified    |
|---------------------------------|-------------------|---------------------------------------|----------------------------------------|--------------------|--------------------|-----------------|-----------------|-----------------|---------------------------|----------------|----------------|
| <b>2-Star Targets</b>           |                   |                                       |                                        |                    |                    |                 |                 |                 |                           |                |                |
| <b>Calories</b>                 |                   |                                       |                                        |                    |                    |                 |                 |                 |                           |                |                |
| Baseline (2014 average product) | 1,255,910,200,027 | 479,671,141,003                       | 776,239,059,025                        | 853,884,973,711    | 126,091,070,846    | 202,453,232,533 | 73,480,922,938  | 778,997,491,746 | 326,949,778,201           | 79,496,371,873 | 70,466,558,208 |
| Reformulated healthier product  | 1,120,459,870,310 | 427,938,450,080                       | 692,521,420,230                        | 761,793,197,382    | 112,492,107,226    | 180,618,584,563 | 65,555,981,139  | 694,982,355,072 | 291,688,136,678           | 70,922,661,920 | 62,866,716,640 |
| Total change                    | -135,450,329,717  | -51,732,690,923                       | -83,717,638,794                        | -92,091,776,328    | -13,598,963,620    | -21,834,647,969 | -7,924,941,799  | -84,015,136,674 | -35,261,641,523           | -8,573,709,953 | -7,599,841,568 |
| Baseline per AE per day         | 26.35             | 26.63                                 | 26.18                                  | 27.86              | 25.84              | 23.40           | 21.13           | 25.88           | 26.91                     | 29.45          | 26.03          |
| Reformulated per AE per day     | 23.51             | 23.76                                 | 23.36                                  | 24.85              | 23.06              | 20.88           | 18.85           | 23.09           | 24.01                     | 26.28          | 23.22          |
| Change per AE per day           | -2.84             | -2.87                                 | -2.82                                  | -3.00              | -2.79              | -2.52           | -2.28           | -2.79           | -2.90                     | -3.18          | -2.81          |
| Percent change per AE per day   | -10.78%           | -10.78%                               | -10.77%                                | -10.77%            | -10.80%            | -10.77%         | -10.79%         | -10.78%         | -10.78%                   | -10.80%        | -10.80%        |
| <b>Saturated Fat (g)</b>        |                   |                                       |                                        |                    |                    |                 |                 |                 |                           |                |                |
| Baseline (2014 average product) | 22,114,339,546    | 8,446,153,620                         | 13,668,185,926                         | 15,035,392,054     | 2,220,238,958      | 3,564,840,485   | 1,293,868,049   | 13,716,757,008  | 5,757,002,698             | 1,399,789,380  | 1,240,790,460  |
| Reformulated healthier product  | 8,292,877,330     | 3,167,307,608                         | 5,125,569,722                          | 5,638,272,020      | 832,589,609        | 1,336,815,182   | 485,200,518     | 5,143,783,878   | 2,158,876,012             | 524,921,018    | 465,296,423    |
| Total change                    | -13,821,462,216   | -5,278,846,013                        | -8,542,616,204                         | -9,397,120,034     | -1,387,649,349     | -2,228,025,303  | -808,667,531    | -8,572,973,130  | -3,598,126,686            | -874,868,363   | -775,494,038   |
| Baseline per AE per day         | 0.46              | 0.47                                  | 0.46                                   | 0.49               | 0.46               | 0.41            | 0.37            | 0.46            | 0.47                      | 0.52           | 0.46           |
| Reformulated per AE per day     | 0.17              | 0.18                                  | 0.17                                   | 0.18               | 0.17               | 0.15            | 0.14            | 0.17            | 0.18                      | 0.19           | 0.17           |
| Change per AE per day           | -0.29             | -0.29                                 | -0.29                                  | -0.31              | -0.28              | -0.26           | -0.23           | -0.28           | -0.30                     | -0.32          | -0.29          |
| Percent change per AE per day   | -63.04%           | -61.70%                               | -63.04%                                | -63.27%            | -60.87%            | -63.41%         | -62.16%         | -60.87%         | -63.83%                   | -61.54%        | -63.04%        |
| <b>Sugars (g)</b>               |                   |                                       |                                        |                    |                    |                 |                 |                 |                           |                |                |
| Baseline (2014 average product) | 91,221,650,626    | 34,840,383,683                        | 56,381,266,943                         | 62,020,992,221     | 9,158,485,703      | 14,704,967,000  | 5,337,205,701   | 56,581,622,658  | 23,747,636,128            | 5,774,131,193  | 5,118,260,648  |
| Reformulated healthier product  | 40,542,955,834    | 15,484,614,970                        | 25,058,340,864                         | 27,564,885,432     | 4,070,438,090      | 6,535,540,889   | 2,372,091,423   | 25,147,387,848  | 10,554,504,946            | 2,566,280,530  | 2,274,782,510  |
| Total change                    | -50,678,694,792   | -19,355,768,713                       | -31,322,926,080                        | -34,456,106,790    | -5,088,047,613     | -8,169,426,111  | -2,965,114,279  | -31,434,234,810 | -13,193,131,182           | -3,207,850,663 | -2,843,478,138 |
| Baseline per AE per day         | 1.91              | 1.93                                  | 1.90                                   | 2.02               | 1.88               | 1.70            | 1.53            | 1.88            | 1.95                      | 2.14           | 1.89           |
| Reformulated per AE per day     | 0.85              | 0.86                                  | 0.85                                   | 0.90               | 0.83               | 0.76            | 0.68            | 0.84            | 0.87                      | 0.95           | 0.84           |
| Change per AE per day           | -1.06             | -1.07                                 | -1.06                                  | -1.12              | -1.04              | -0.94           | -0.85           | -1.04           | -1.09                     | -1.19          | -1.05          |
| Percent change per AE per day   | -55.50%           | -55.44%                               | -55.79%                                | -55.45%            | -55.32%            | -55.29%         | -55.56%         | -55.32%         | -55.90%                   | -55.61%        | -55.56%        |
| <b>Sodium (mg)</b>              |                   |                                       |                                        |                    |                    |                 |                 |                 |                           |                |                |
| Baseline (2014 average product) | 845,873,487,619   | 323,065,375,965                       | 522,808,111,654                        | 575,103,746,050    | 84,924,140,159     | 136,355,148,544 | 49,490,452,867  | 524,665,955,556 | 220,205,353,183           | 53,541,943,785 | 47,460,235,095 |
| Reformulated healthier product  | 854,166,364,949   | 326,232,683,573                       | 527,933,681,376                        | 580,742,018,070    | 85,756,729,768     | 137,691,963,725 | 49,975,653,385  | 529,809,739,434 | 222,364,229,195           | 54,066,864,803 | 47,925,531,518 |
| Total change                    | 8,292,877,330     | 3,167,307,608                         | 5,125,569,722                          | 5,638,272,020      | 832,589,609        | 1,336,815,182   | 485,200,518     | 5,143,783,878   | 2,158,876,012             | 524,921,018    | 465,296,423    |
| Baseline per AE per day         | 17.75             | 17.94                                 | 17.63                                  | 18.76              | 17.41              | 15.76           | 14.23           | 17.43           | 18.12                     | 19.84          | 17.53          |
| Reformulated per AE per day     | 17.92             | 18.11                                 | 17.81                                  | 18.95              | 17.58              | 15.91           | 14.37           | 17.60           | 18.30                     | 20.03          | 17.70          |
| Change per AE per day           | 0.17              | 0.18                                  | 0.17                                   | 0.18               | 0.17               | 0.15            | 0.14            | 0.17            | 0.18                      | 0.19           | 0.17           |
| Percent change per AE per day   | 0.96%             | 1.00%                                 | 0.96%                                  | 0.96%              | 0.98%              | 0.95%           | 0.98%           | 0.98%           | 0.99%                     | 0.96%          | 0.97%          |
| <b>Dietary Fiber (g)</b>        |                   |                                       |                                        |                    |                    |                 |                 |                 |                           |                |                |
| Baseline (2014 average product) | 6,450,015,701     | 2,463,461,473                         | 3,986,554,228                          | 4,385,322,682      | 647,569,696        | 1,039,745,141   | 377,378,181     | 4,000,720,794   | 1,679,125,787             | 408,271,903    | 361,897,218    |
| Reformulated healthier product  | 23,035,770,360    | 8,798,076,688                         | 14,237,693,673                         | 15,661,866,723     | 2,312,748,915      | 3,713,375,505   | 1,347,779,218   | 14,288,288,550  | 5,996,877,810             | 1,458,113,938  | 1,292,490,063  |
| Total change                    | 16,585,754,659    | 6,334,615,215                         | 10,251,139,444                         | 11,276,544,040     | 1,665,179,219      | 2,673,630,364   | 970,401,037     | 10,287,567,756  | 4,317,752,023             | 1,049,842,035  | 930,592,845    |
| Baseline per AE per day         | 0.14              | 0.14                                  | 0.13                                   | 0.14               | 0.13               | 0.12            | 0.11            | 0.13            | 0.14                      | 0.15           | 0.13           |
| Reformulated per AE per day     | 0.48              | 0.49                                  | 0.48                                   | 0.51               | 0.47               | 0.43            | 0.39            | 0.47            | 0.49                      | 0.54           | 0.48           |
| Change per AE per day           | 0.35              | 0.35                                  | 0.35                                   | 0.37               | 0.34               | 0.31            | 0.28            | 0.34            | 0.36                      | 0.39           | 0.34           |
| Percent change per AE per day   | 250.00%           | 250.00%                               | 269.23%                                | 264.29%            | 261.54%            | 258.33%         | 254.55%         | 261.54%         | 257.14%                   | 260.00%        | 261.54%        |

Potential Improvements from Reformulation of **Crackers** by Demographic Group for Consumer Network Households with Children (Weighted), 2014

|                                 | All Households    | Low Income (<185%<br>of Poverty Line) | High Income (>185%<br>of Poverty Line) | Non-Hispanic White | Non-Hispanic Black | Hispanic        | Asian and Other | Urban             | Part Urban<br>/Part Rural | Rural           | Unspecified     |
|---------------------------------|-------------------|---------------------------------------|----------------------------------------|--------------------|--------------------|-----------------|-----------------|-------------------|---------------------------|-----------------|-----------------|
| <b>1-Star Targets</b>           |                   |                                       |                                        |                    |                    |                 |                 |                   |                           |                 |                 |
| <b>Calories</b>                 |                   |                                       |                                        |                    |                    |                 |                 |                   |                           |                 |                 |
| Baseline (2014 average product) | 1,008,973,021,900 | 332,959,001,315                       | 676,014,020,716                        | 736,039,415,925    | 76,372,084,751     | 139,159,180,775 | 57,402,340,448  | 632,244,563,507   | 265,837,222,699           | 58,279,370,668  | 52,611,865,025  |
| Reformulated healthier product  | 992,080,018,489   | 327,384,345,281                       | 664,695,673,337                        | 723,716,077,150    | 75,093,404,489     | 136,829,270,594 | 56,441,266,255  | 621,659,038,090   | 261,386,371,178           | 57,303,612,560  | 51,730,996,661  |
| Total change                    | -16,893,003,411   | -5,574,656,034                        | -11,318,347,379                        | -12,323,338,775    | -1,278,680,262     | -2,329,910,180  | -961,074,193    | -10,585,525,416   | -4,450,851,522            | -975,758,109    | -880,868,364    |
| Baseline per AE per day         | 21.17             | 18.49                                 | 22.80                                  | 24.01              | 15.65              | 16.08           | 16.51           | 21.00             | 21.88                     | 21.59           | 19.43           |
| Reformulated per AE per day     | 20.82             | 18.18                                 | 22.42                                  | 23.61              | 15.39              | 15.81           | 16.23           | 20.65             | 21.51                     | 21.23           | 19.11           |
| Change per AE per day           | -0.35             | -0.31                                 | -0.38                                  | -0.40              | -0.26              | -0.27           | -0.28           | -0.35             | -0.37                     | -0.36           | -0.33           |
| Percent change per AE per day   | -1.65%            | -1.68%                                | -1.67%                                 | -1.67%             | -1.66%             | -1.68%          | -1.70%          | -1.67%            | -1.69%                    | -1.67%          | -1.70%          |
| <b>Saturated Fat (g)</b>        |                   |                                       |                                        |                    |                    |                 |                 |                   |                           |                 |                 |
| Baseline (2014 average product) | 6,910,774,123     | 2,280,541,105                         | 4,630,233,019                          | 5,041,365,863      | 523,096,471        | 953,145,074     | 393,166,715     | 4,330,442,216     | 1,820,802,895             | 399,173,772     | 360,355,240     |
| Reformulated healthier product  | 3,071,455,166     | 1,013,573,824                         | 2,057,881,342                          | 2,240,607,050      | 232,487,320        | 423,620,033     | 174,740,762     | 1,924,640,985     | 809,245,731               | 177,410,565     | 160,157,884     |
| Total change                    | -3,839,318,957    | -1,266,967,281                        | -2,572,351,677                         | -2,800,758,813     | -290,609,151       | -529,525,041    | -218,425,953    | -2,405,801,231    | -1,011,557,164            | -221,763,207    | -200,197,356    |
| Baseline per AE per day         | 0.15              | 0.13                                  | 0.16                                   | 0.16               | 0.11               | 0.11            | 0.11            | 0.14              | 0.15                      | 0.15            | 0.13            |
| Reformulated per AE per day     | 0.06              | 0.06                                  | 0.07                                   | 0.07               | 0.05               | 0.05            | 0.05            | 0.06              | 0.07                      | 0.07            | 0.06            |
| Change per AE per day           | -0.08             | -0.07                                 | -0.09                                  | -0.09              | -0.06              | -0.06           | -0.06           | -0.08             | -0.08                     | -0.08           | -0.07           |
| Percent change per AE per day   | -53.33%           | -53.85%                               | -56.25%                                | -56.25%            | -54.55%            | -54.55%         | -54.55%         | -57.14%           | -53.33%                   | -53.33%         | -53.85%         |
| <b>Sugars (g)</b>               |                   |                                       |                                        |                    |                    |                 |                 |                   |                           |                 |                 |
| Baseline (2014 average product) | 16,893,003,411    | 5,574,656,034                         | 11,318,347,379                         | 12,323,338,775     | 1,278,680,262      | 2,329,910,180   | 961,074,193     | 10,585,525,416    | 4,450,851,522             | 975,758,109     | 880,868,364     |
| Reformulated healthier product  | 3,839,318,957     | 1,266,967,281                         | 2,572,351,677                          | 2,800,758,813      | 290,609,151        | 529,525,041     | 218,425,953     | 2,405,801,231     | 1,011,557,164             | 221,763,207     | 200,197,356     |
| Total change                    | -13,053,684,454   | -4,307,688,754                        | -8,745,995,702                         | -9,522,579,963     | -988,071,112       | -1,800,385,139  | -742,648,240    | -8,179,724,185    | -3,439,294,358            | -753,994,902    | -680,671,009    |
| Baseline per AE per day         | 0.35              | 0.31                                  | 0.38                                   | 0.40               | 0.26               | 0.27            | 0.28            | 0.35              | 0.37                      | 0.36            | 0.33            |
| Reformulated per AE per day     | 0.08              | 0.07                                  | 0.09                                   | 0.09               | 0.06               | 0.06            | 0.06            | 0.08              | 0.08                      | 0.08            | 0.07            |
| Change per AE per day           | -0.27             | -0.24                                 | -0.29                                  | -0.31              | -0.20              | -0.21           | -0.21           | -0.27             | -0.28                     | -0.28           | -0.25           |
| Percent change per AE per day   | -77.14%           | -77.42%                               | -76.32%                                | -77.50%            | -76.92%            | -77.78%         | -75.00%         | -77.14%           | -75.68%                   | -77.78%         | -75.76%         |
| <b>Sodium (mg)</b>              |                   |                                       |                                        |                    |                    |                 |                 |                   |                           |                 |                 |
| Baseline (2014 average product) | 1,606,371,051,609 | 530,099,110,161                       | 1,076,271,941,657                      | 1,171,837,487,150  | 121,590,868,569    | 221,553,277,154 | 91,389,418,735  | 1,006,587,235,050 | 423,235,517,418           | 92,785,725,600  | 83,762,573,541  |
| Reformulated healthier product  | 1,344,529,498,741 | 443,691,941,631                       | 900,837,557,285                        | 980,825,736,138    | 101,771,324,505    | 185,439,669,358 | 76,492,768,741  | 842,511,591,096   | 354,247,318,833           | 77,661,474,916  | 70,109,113,896  |
| Total change                    | -261,841,552,867  | -86,407,168,530                       | -175,434,384,371                       | -191,011,751,013   | -19,819,544,064    | -36,113,607,796 | -14,896,649,995 | -164,075,643,954  | -68,988,198,585           | -15,124,250,683 | -13,653,459,645 |
| Baseline per AE per day         | 33.70             | 29.43                                 | 36.30                                  | 38.23              | 24.92              | 25.61           | 26.28           | 33.44             | 34.83                     | 34.38           | 30.94           |
| Reformulated per AE per day     | 28.21             | 24.63                                 | 30.38                                  | 32.00              | 20.86              | 21.43           | 21.99           | 27.99             | 29.15                     | 28.77           | 25.90           |
| Change per AE per day           | -5.49             | -4.80                                 | -5.92                                  | -6.23              | -4.06              | -4.17           | -4.28           | -5.45             | -5.68                     | -5.60           | -5.04           |
| Percent change per AE per day   | -16.29%           | -16.31%                               | -16.31%                                | -16.30%            | -16.29%            | -16.28%         | -16.29%         | -16.30%           | -16.31%                   | -16.29%         | -16.29%         |
| <b>Dietary Fiber (g)</b>        |                   |                                       |                                        |                    |                    |                 |                 |                   |                           |                 |                 |
| Baseline (2014 average product) | 9,982,229,288     | 3,294,114,929                         | 6,688,114,360                          | 7,281,972,913      | 755,583,791        | 1,376,765,107   | 567,907,478     | 6,255,083,201     | 2,630,048,626             | 576,584,337     | 520,513,124     |
| Reformulated healthier product  | 13,053,684,454    | 4,307,688,754                         | 8,745,995,702                          | 9,522,579,963      | 988,071,112        | 1,800,385,139   | 742,648,240     | 8,179,724,185     | 3,439,294,358             | 753,994,902     | 680,671,009     |
| Total change                    | 3,071,455,166     | 1,013,573,824                         | 2,057,881,342                          | 2,240,607,050      | 232,487,320        | 423,620,033     | 174,740,762     | 1,924,640,985     | 809,245,731               | 177,410,565     | 160,157,884     |
| Baseline per AE per day         | 0.21              | 0.18                                  | 0.23                                   | 0.24               | 0.15               | 0.16            | 0.16            | 0.21              | 0.22                      | 0.21            | 0.19            |
| Reformulated per AE per day     | 0.27              | 0.24                                  | 0.29                                   | 0.31               | 0.20               | 0.21            | 0.21            | 0.27              | 0.28                      | 0.28            | 0.25            |
| Change per AE per day           | 0.06              | 0.06                                  | 0.07                                   | 0.07               | 0.05               | 0.05            | 0.05            | 0.06              | 0.07                      | 0.07            | 0.06            |
| Percent change per AE per day   | 28.57%            | 33.33%                                | 30.43%                                 | 29.17%             | 33.33%             | 31.25%          | 31.25%          | 28.57%            | 31.82%                    | 33.33%          | 31.58%          |

Potential Improvements from Reformulation of **Crackers** by Demographic Group for Consumer Network Households with Children (Weighted), 2014

|                                 | All Households    | Low Income (<185%<br>of Poverty Line) | High Income (>185%<br>of Poverty Line) | Non-Hispanic White | Non-Hispanic Black | Hispanic        | Asian and Other | Urban             | Part Urban<br>/Part Rural | Rural           | Unspecified     |
|---------------------------------|-------------------|---------------------------------------|----------------------------------------|--------------------|--------------------|-----------------|-----------------|-------------------|---------------------------|-----------------|-----------------|
| <b>2-Star Targets</b>           |                   |                                       |                                        |                    |                    |                 |                 |                   |                           |                 |                 |
| <b>Calories</b>                 |                   |                                       |                                        |                    |                    |                 |                 |                   |                           |                 |                 |
| Baseline (2014 average product) | 1,008,973,021,900 | 332,959,001,315                       | 676,014,020,716                        | 736,039,415,925    | 76,372,084,751     | 139,159,180,775 | 57,402,340,448  | 632,244,563,507   | 265,837,222,699           | 58,279,370,668  | 52,611,865,025  |
| Reformulated healthier product  | 1,010,508,749,482 | 333,465,788,228                       | 677,042,961,386                        | 737,159,719,450    | 76,488,328,412     | 139,370,990,791 | 57,489,710,830  | 633,206,883,999   | 266,241,845,565           | 58,368,075,951  | 52,691,943,968  |
| Total change                    | 1,535,727,583     | 506,786,912                           | 1,028,940,671                          | 1,120,303,525      | 116,243,660        | 211,810,016     | 87,370,381      | 962,320,492       | 404,622,866               | 88,705,283      | 80,078,942      |
| Baseline per AE per day         | 21.17             | 18.49                                 | 22.80                                  | 24.01              | 15.65              | 16.08           | 16.51           | 21.00             | 21.88                     | 21.59           | 19.43           |
| Reformulated per AE per day     | 21.20             | 18.51                                 | 22.84                                  | 24.05              | 15.68              | 16.11           | 16.53           | 21.03             | 21.91                     | 21.62           | 19.46           |
| Change per AE per day           | 0.03              | 0.03                                  | 0.03                                   | 0.04               | 0.02               | 0.02            | 0.03            | 0.03              | 0.03                      | 0.03            | 0.03            |
| Percent change per AE per day   | 0.14%             | 0.16%                                 | 0.13%                                  | 0.17%              | 0.13%              | 0.12%           | 0.18%           | 0.14%             | 0.14%                     | 0.14%           | 0.15%           |
| <b>Saturated Fat (g)</b>        |                   |                                       |                                        |                    |                    |                 |                 |                   |                           |                 |                 |
| Baseline (2014 average product) | 6,910,774,123     | 2,280,541,105                         | 4,630,233,019                          | 5,041,365,863      | 523,096,471        | 953,145,074     | 393,166,715     | 4,330,442,216     | 1,820,802,895             | 399,173,772     | 360,355,240     |
| Reformulated healthier product  | 3,071,455,166     | 1,013,573,824                         | 2,057,881,342                          | 2,240,607,050      | 232,487,320        | 423,620,033     | 174,740,762     | 1,924,640,985     | 809,245,731               | 177,410,565     | 160,157,884     |
| Total change                    | -3,839,318,957    | -1,266,967,281                        | -2,572,351,677                         | -2,800,758,813     | -290,609,151       | -529,525,041    | -218,425,953    | -2,405,801,231    | -1,011,557,164            | -221,763,207    | -200,197,356    |
| Baseline per AE per day         | 0.15              | 0.13                                  | 0.16                                   | 0.16               | 0.11               | 0.11            | 0.11            | 0.14              | 0.15                      | 0.15            | 0.13            |
| Reformulated per AE per day     | 0.06              | 0.06                                  | 0.07                                   | 0.07               | 0.05               | 0.05            | 0.05            | 0.06              | 0.07                      | 0.07            | 0.06            |
| Change per AE per day           | -0.08             | -0.07                                 | -0.09                                  | -0.09              | -0.06              | -0.06           | -0.06           | -0.08             | -0.08                     | -0.08           | -0.07           |
| Percent change per AE per day   | -53.33%           | -53.85%                               | -56.25%                                | -56.25%            | -54.55%            | -54.55%         | -54.55%         | -57.14%           | -53.33%                   | -53.33%         | -53.85%         |
| <b>Sugars (g)</b>               |                   |                                       |                                        |                    |                    |                 |                 |                   |                           |                 |                 |
| Baseline (2014 average product) | 16,893,003,411    | 5,574,656,034                         | 11,318,347,379                         | 12,323,338,775     | 1,278,680,262      | 2,329,910,180   | 961,074,193     | 10,585,525,416    | 4,450,851,522             | 975,758,109     | 880,868,364     |
| Reformulated healthier product  | 2,303,591,374     | 760,180,368                           | 1,543,411,006                          | 1,680,455,288      | 174,365,490        | 317,715,025     | 131,055,572     | 1,443,480,739     | 606,934,298               | 133,057,924     | 120,118,413     |
| Total change                    | -14,589,412,037   | -4,814,475,666                        | -9,774,936,373                         | -10,642,883,488    | -1,104,314,772     | -2,012,195,156  | -830,018,621    | -9,142,044,678    | -3,843,917,223            | -842,700,185    | -760,749,951    |
| Baseline per AE per day         | 0.35              | 0.31                                  | 0.38                                   | 0.40               | 0.26               | 0.27            | 0.28            | 0.35              | 0.37                      | 0.36            | 0.33            |
| Reformulated per AE per day     | 0.05              | 0.04                                  | 0.05                                   | 0.05               | 0.04               | 0.04            | 0.04            | 0.05              | 0.05                      | 0.05            | 0.04            |
| Change per AE per day           | -0.31             | -0.27                                 | -0.33                                  | -0.35              | -0.23              | -0.23           | -0.24           | -0.30             | -0.32                     | -0.31           | -0.28           |
| Percent change per AE per day   | -88.57%           | -87.10%                               | -86.84%                                | -87.50%            | -88.46%            | -85.19%         | -85.71%         | -85.71%           | -86.49%                   | -86.11%         | -84.85%         |
| <b>Sodium (mg)</b>              |                   |                                       |                                        |                    |                    |                 |                 |                   |                           |                 |                 |
| Baseline (2014 average product) | 1,606,371,051,609 | 530,099,110,161                       | 1,076,271,941,657                      | 1,171,837,487,150  | 121,590,868,569    | 221,553,277,154 | 91,389,418,735  | 1,006,587,235,050 | 423,235,517,418           | 92,785,725,600  | 83,762,573,541  |
| Reformulated healthier product  | 1,051,973,394,218 | 347,149,034,857                       | 704,824,359,498                        | 767,407,914,625    | 79,626,907,237     | 145,089,861,234 | 59,848,711,122  | 659,189,537,294   | 277,166,662,936           | 60,763,118,581  | 54,854,075,407  |
| Total change                    | -554,397,657,391  | -182,950,075,304                      | -371,447,582,159                       | -404,429,572,525   | -41,963,961,332    | -76,463,415,920 | -31,540,707,613 | -347,397,697,756  | -146,068,854,482          | -32,022,607,019 | -28,908,498,134 |
| Baseline per AE per day         | 33.70             | 29.43                                 | 36.30                                  | 38.23              | 24.92              | 25.61           | 26.28           | 33.44             | 34.83                     | 34.38           | 30.94           |
| Reformulated per AE per day     | 22.07             | 19.27                                 | 23.77                                  | 25.04              | 16.32              | 16.77           | 17.21           | 21.90             | 22.81                     | 22.51           | 20.26           |
| Change per AE per day           | -11.63            | -10.16                                | -12.53                                 | -13.19             | -8.60              | -8.84           | -9.07           | -11.54            | -12.02                    | -11.86          | -10.68          |
| Percent change per AE per day   | -34.51%           | -34.52%                               | -34.52%                                | -34.50%            | -34.51%            | -34.52%         | -34.51%         | -34.51%           | -34.51%                   | -34.50%         | -34.52%         |
| <b>Dietary Fiber (g)</b>        |                   |                                       |                                        |                    |                    |                 |                 |                   |                           |                 |                 |
| Baseline (2014 average product) | 9,982,229,288     | 3,294,114,929                         | 6,688,114,360                          | 7,281,972,913      | 755,583,791        | 1,376,765,107   | 567,907,478     | 6,255,083,201     | 2,630,048,626             | 576,584,337     | 520,513,124     |
| Reformulated healthier product  | 24,571,641,325    | 8,108,590,595                         | 16,463,050,733                         | 17,924,856,400     | 1,859,898,563      | 3,388,960,262   | 1,397,926,099   | 15,397,127,878    | 6,473,965,850             | 1,419,284,522   | 1,281,263,075   |
| Total change                    | 14,589,412,037    | 4,814,475,666                         | 9,774,936,373                          | 10,642,883,488     | 1,104,314,772      | 2,012,195,156   | 830,018,621     | 9,142,044,678     | 3,843,917,223             | 842,700,185     | 760,749,951     |
| Baseline per AE per day         | 0.21              | 0.18                                  | 0.23                                   | 0.24               | 0.15               | 0.16            | 0.16            | 0.21              | 0.22                      | 0.21            | 0.19            |
| Reformulated per AE per day     | 0.52              | 0.45                                  | 0.56                                   | 0.58               | 0.38               | 0.39            | 0.40            | 0.51              | 0.53                      | 0.53            | 0.47            |
| Change per AE per day           | 0.31              | 0.27                                  | 0.33                                   | 0.35               | 0.23               | 0.23            | 0.24            | 0.30              | 0.32                      | 0.31            | 0.28            |
| Percent change per AE per day   | 147.62%           | 150.00%                               | 143.48%                                | 145.83%            | 153.33%            | 143.75%         | 150.00%         | 142.86%           | 145.45%                   | 147.62%         | 147.37%         |

Potential Improvements from Reformulation of **Crackers** by Demographic Group for Consumer Network Households with Children (Weighted), 2014

|                                 | All Households    | Low Income (<185%<br>of Poverty Line) | High Income (>185%<br>of Poverty Line) | Non-Hispanic White | Non-Hispanic Black | Hispanic        | Asian and Other | Urban             | Part Urban<br>/Part Rural | Rural           | Unspecified     |
|---------------------------------|-------------------|---------------------------------------|----------------------------------------|--------------------|--------------------|-----------------|-----------------|-------------------|---------------------------|-----------------|-----------------|
| <b>3-Star Targets</b>           |                   |                                       |                                        |                    |                    |                 |                 |                   |                           |                 |                 |
| <b>Calories</b>                 |                   |                                       |                                        |                    |                    |                 |                 |                   |                           |                 |                 |
| Baseline (2014 average product) | 1,008,973,021,900 | 332,959,001,315                       | 676,014,020,716                        | 736,039,415,925    | 76,372,084,751     | 139,159,180,775 | 57,402,340,448  | 632,244,563,507   | 265,837,222,699           | 58,279,370,668  | 52,611,865,025  |
| Reformulated healthier product  | 1,053,509,121,801 | 347,655,821,769                       | 705,853,300,169                        | 768,528,218,150    | 79,743,150,897     | 145,301,671,250 | 59,936,081,503  | 660,151,857,786   | 277,571,285,802           | 60,851,823,864  | 54,934,154,349  |
| Total change                    | 44,536,099,901    | 14,696,820,454                        | 29,839,279,453                         | 32,488,802,225     | 3,371,066,146      | 6,142,490,476   | 2,533,741,055   | 27,907,294,280    | 11,734,063,102            | 2,572,453,195   | 2,322,289,324   |
| Baseline per AE per day         | 21.17             | 18.49                                 | 22.80                                  | 24.01              | 15.65              | 16.08           | 16.51           | 21.00             | 21.88                     | 21.59           | 19.43           |
| Reformulated per AE per day     | 22.10             | 19.30                                 | 23.81                                  | 25.07              | 16.34              | 16.79           | 17.23           | 21.93             | 22.84                     | 22.54           | 20.29           |
| Change per AE per day           | 0.93              | 0.82                                  | 1.01                                   | 1.06               | 0.69               | 0.71            | 0.73            | 0.93              | 0.97                      | 0.95            | 0.86            |
| Percent change per AE per day   | 4.39%             | 4.43%                                 | 4.43%                                  | 4.41%              | 4.41%              | 4.42%           | 4.42%           | 4.43%             | 4.43%                     | 4.40%           | 4.43%           |
| <b>Saturated Fat (g)</b>        |                   |                                       |                                        |                    |                    |                 |                 |                   |                           |                 |                 |
| Baseline (2014 average product) | 6,910,774,123     | 2,280,541,105                         | 4,630,233,019                          | 5,041,365,863      | 523,096,471        | 953,145,074     | 393,166,715     | 4,330,442,216     | 1,820,802,895             | 399,173,772     | 360,355,240     |
| Reformulated healthier product  | 4,607,182,748     | 1,520,360,737                         | 3,086,822,012                          | 3,360,910,575      | 348,730,981        | 635,430,049     | 262,111,144     | 2,886,961,477     | 1,213,868,597             | 266,115,848     | 240,236,827     |
| Total change                    | -2,303,591,374    | -760,180,368                          | -1,543,411,006                         | -1,680,455,288     | -174,365,490       | -317,715,025    | -131,055,572    | -1,443,480,739    | -606,934,298              | -133,057,924    | -120,118,413    |
| Baseline per AE per day         | 0.15              | 0.13                                  | 0.16                                   | 0.16               | 0.11               | 0.11            | 0.11            | 0.14              | 0.15                      | 0.15            | 0.13            |
| Reformulated per AE per day     | 0.10              | 0.08                                  | 0.10                                   | 0.11               | 0.07               | 0.07            | 0.08            | 0.10              | 0.10                      | 0.10            | 0.09            |
| Change per AE per day           | -0.05             | -0.04                                 | -0.05                                  | -0.05              | -0.04              | -0.04           | -0.04           | -0.05             | -0.05                     | -0.05           | -0.04           |
| Percent change per AE per day   | -33.33%           | -30.77%                               | -31.25%                                | -31.25%            | -36.36%            | -36.36%         | -36.36%         | -35.71%           | -33.33%                   | -33.33%         | -30.77%         |
| <b>Sugars (g)</b>               |                   |                                       |                                        |                    |                    |                 |                 |                   |                           |                 |                 |
| Baseline (2014 average product) | 16,893,003,411    | 5,574,656,034                         | 11,318,347,379                         | 12,323,338,775     | 1,278,680,262      | 2,329,910,180   | 961,074,193     | 10,585,525,416    | 4,450,851,522             | 975,758,109     | 880,868,364     |
| Reformulated healthier product  | 1,535,727,583     | 506,786,912                           | 1,028,940,671                          | 1,120,303,525      | 116,243,660        | 211,810,016     | 87,370,381      | 962,320,492       | 404,622,866               | 88,705,283      | 80,078,942      |
| Total change                    | -15,357,275,828   | -5,067,869,122                        | -10,289,406,708                        | -11,203,035,250    | -1,162,436,602     | -2,118,100,164  | -873,703,812    | -9,623,204,924    | -4,046,228,656            | -887,052,826    | -800,789,422    |
| Baseline per AE per day         | 0.35              | 0.31                                  | 0.38                                   | 0.40               | 0.26               | 0.27            | 0.28            | 0.35              | 0.37                      | 0.36            | 0.33            |
| Reformulated per AE per day     | 0.03              | 0.03                                  | 0.03                                   | 0.04               | 0.02               | 0.02            | 0.03            | 0.03              | 0.03                      | 0.03            | 0.03            |
| Change per AE per day           | -0.32             | -0.28                                 | -0.35                                  | -0.37              | -0.24              | -0.24           | -0.25           | -0.32             | -0.33                     | -0.33           | -0.30           |
| Percent change per AE per day   | -91.43%           | -90.32%                               | -92.11%                                | -92.50%            | -92.31%            | -88.89%         | -89.29%         | -91.43%           | -89.19%                   | -91.67%         | -90.91%         |
| <b>Sodium (mg)</b>              |                   |                                       |                                        |                    |                    |                 |                 |                   |                           |                 |                 |
| Baseline (2014 average product) | 1,606,371,051,609 | 530,099,110,161                       | 1,076,271,941,657                      | 1,171,837,487,150  | 121,590,868,569    | 221,553,277,154 | 91,389,418,735  | 1,006,587,235,050 | 423,235,517,418           | 92,785,725,600  | 83,762,573,541  |
| Reformulated healthier product  | 936,793,825,508   | 309,140,016,442                       | 627,653,809,188                        | 683,385,150,250    | 70,908,632,722     | 129,204,110,004 | 53,295,932,532  | 587,015,500,364   | 246,819,948,016           | 54,110,222,386  | 48,848,154,742  |
| Total change                    | -669,577,226,101  | -220,959,093,719                      | -448,618,132,469                       | -488,452,336,900   | -50,682,235,847    | -92,349,167,150 | -38,093,486,203 | -419,571,734,686  | -176,415,569,402          | -38,675,503,214 | -34,914,418,799 |
| Baseline per AE per day         | 33.70             | 29.43                                 | 36.30                                  | 38.23              | 24.92              | 25.61           | 26.28           | 33.44             | 34.83                     | 34.38           | 30.94           |
| Reformulated per AE per day     | 19.66             | 17.16                                 | 21.17                                  | 22.30              | 14.53              | 14.93           | 15.32           | 19.50             | 20.31                     | 20.05           | 18.04           |
| Change per AE per day           | -14.05            | -12.27                                | -15.13                                 | -15.94             | -10.39             | -10.67          | -10.95          | -13.94            | -14.52                    | -14.33          | -12.90          |
| Percent change per AE per day   | -41.69%           | -41.69%                               | -41.68%                                | -41.70%            | -41.69%            | -41.66%         | -41.67%         | -41.69%           | -41.69%                   | -41.68%         | -41.69%         |
| <b>Dietary Fiber (g)</b>        |                   |                                       |                                        |                    |                    |                 |                 |                   |                           |                 |                 |
| Baseline (2014 average product) | 9,982,229,288     | 3,294,114,929                         | 6,688,114,360                          | 7,281,972,913      | 755,583,791        | 1,376,765,107   | 567,907,478     | 6,255,083,201     | 2,630,048,626             | 576,584,337     | 520,513,124     |
| Reformulated healthier product  | 33,018,143,030    | 10,895,918,612                        | 22,122,224,422                         | 24,086,525,788     | 2,499,238,694      | 4,553,915,353   | 1,878,463,196   | 20,689,890,587    | 8,699,391,610             | 1,907,163,576   | 1,721,697,257   |
| Total change                    | 23,035,913,742    | 7,601,803,683                         | 15,434,110,062                         | 16,804,552,875     | 1,743,654,903      | 3,177,150,246   | 1,310,555,718   | 14,434,807,386    | 6,069,342,984             | 1,330,579,239   | 1,201,184,133   |
| Baseline per AE per day         | 0.21              | 0.18                                  | 0.23                                   | 0.24               | 0.15               | 0.16            | 0.16            | 0.21              | 0.22                      | 0.21            | 0.19            |
| Reformulated per AE per day     | 0.69              | 0.60                                  | 0.75                                   | 0.79               | 0.51               | 0.53            | 0.54            | 0.69              | 0.72                      | 0.71            | 0.64            |
| Change per AE per day           | 0.48              | 0.42                                  | 0.52                                   | 0.55               | 0.36               | 0.37            | 0.38            | 0.48              | 0.50                      | 0.49            | 0.44            |
| Percent change per AE per day   | 228.57%           | 233.33%                               | 226.09%                                | 229.17%            | 240.00%            | 231.25%         | 237.50%         | 228.57%           | 227.27%                   | 233.33%         | 231.58%         |

**Potential Improvements from Reformulation of Fruit Drinks by Demographic Group for Consumer Network Households with Children (Weighted), 2014**

[illegible]

Potential Improvements from Reformulation of Ice Cream by Demographic Group for Consumer Network Households with Children (Weighted), 2014

|                                 | All Households    | Low Income (<185%<br>of Poverty Line) | High Income (>185%<br>of Poverty Line) | Non-Hispanic White | Non-Hispanic Black | Hispanic        | Asian and Other | Urban            | Part Urban<br>/Part Rural | Rural           | Unspecified     |
|---------------------------------|-------------------|---------------------------------------|----------------------------------------|--------------------|--------------------|-----------------|-----------------|------------------|---------------------------|-----------------|-----------------|
| 1-Star Targets                  |                   |                                       |                                        |                    |                    |                 |                 |                  |                           |                 |                 |
| Calories                        |                   |                                       |                                        |                    |                    |                 |                 |                  |                           |                 |                 |
| Baseline (2014 average product) | 1,271,939,486,077 | 488,246,548,509                       | 783,692,937,568                        | 908,928,416,477    | 103,083,092,948    | 180,379,831,637 | 79,548,145,016  | 788,448,800,285  | 336,065,072,492           | 76,018,602,585  | 71,407,010,715  |
| Reformulated healthier product  | 779,312,424,066   | 299,146,779,721                       | 480,165,644,344                        | 556,896,939,910    | 63,158,614,010     | 110,518,028,086 | 48,738,842,060  | 483,079,543,113  | 205,905,775,514           | 46,576,305,008  | 43,750,800,431  |
| Total change                    | -492,627,062,011  | -189,099,768,788                      | -303,527,293,223                       | -352,031,476,567   | -39,924,478,938    | -69,861,803,551 | -30,809,302,955 | -305,369,257,172 | -130,159,296,978          | -29,442,297,578 | -27,656,210,284 |
| Baseline per AE per day         | 26.69             | 27.11                                 | 26.43                                  | 29.65              | 21.13              | 20.85           | 22.87           | 26.19            | 27.66                     | 28.16           | 26.38           |
| Reformulated per AE per day     | 16.35             | 16.61                                 | 16.20                                  | 18.17              | 12.94              | 12.77           | 14.01           | 16.05            | 16.95                     | 17.26           | 16.16           |
| Change per AE per day           | -10.34            | -10.50                                | -10.24                                 | -11.49             | -8.18              | -8.07           | -8.86           | -10.14           | -10.71                    | -10.91          | -10.22          |
| Percent change per AE per day   | -38.74%           | -38.73%                               | -38.74%                                | -38.75%            | -38.71%            | -38.71%         | -38.74%         | -38.72%          | -38.72%                   | -38.74%         | -38.74%         |
| Saturated Fat (g)               |                   |                                       |                                        |                    |                    |                 |                 |                  |                           |                 |                 |
| Baseline (2014 average product) | 35,382,054,178    | 13,581,751,349                        | 21,800,302,828                         | 25,284,028,704     | 2,867,504,012      | 5,017,698,598   | 2,212,822,864   | 21,932,598,581   | 9,348,457,794             | 2,114,640,158   | 1,986,357,645   |
| Reformulated healthier product  | 9,072,321,584     | 3,482,500,346                         | 5,589,821,238                          | 6,483,084,283      | 735,257,439        | 1,286,589,384   | 567,390,478     | 5,623,743,226    | 2,397,040,460             | 542,215,425     | 509,322,473     |
| Total change                    | -26,309,732,594   | -10,099,251,003                       | -16,210,481,590                        | -18,800,944,421    | -2,132,246,573     | -3,731,109,214  | -1,645,432,386  | -16,308,855,355  | -6,951,417,334            | -1,572,424,733  | -1,477,035,172  |
| Baseline per AE per day         | 0.74              | 0.75                                  | 0.74                                   | 0.82               | 0.59               | 0.58            | 0.64            | 0.73             | 0.77                      | 0.78            | 0.73            |
| Reformulated per AE per day     | 0.19              | 0.19                                  | 0.19                                   | 0.21               | 0.15               | 0.15            | 0.16            | 0.19             | 0.20                      | 0.20            | 0.19            |
| Change per AE per day           | -0.55             | -0.56                                 | -0.55                                  | -0.61              | -0.44              | -0.43           | -0.47           | -0.54            | -0.57                     | -0.58           | -0.55           |
| Percent change per AE per day   | -74.32%           | -74.67%                               | -74.32%                                | -74.39%            | -74.58%            | -74.14%         | -73.44%         | -73.97%          | -74.03%                   | -74.36%         | -75.34%         |
| Sugars (g)                      |                   |                                       |                                        |                    |                    |                 |                 |                  |                           |                 |                 |
| Baseline (2014 average product) | 125,198,037,859   | 48,058,504,775                        | 77,139,533,084                         | 89,466,563,105     | 10,146,552,658     | 17,754,933,499  | 7,829,988,596   | 77,607,656,519   | 33,079,158,348            | 7,482,572,865   | 7,028,650,127   |
| Reformulated healthier product  | 45,361,607,920    | 17,412,501,730                        | 27,949,106,190                         | 32,415,421,415     | 3,676,287,195      | 6,432,946,920   | 2,836,952,390   | 28,118,716,130   | 11,985,202,300            | 2,711,077,125   | 2,546,612,365   |
| Total change                    | -79,836,429,939   | -30,646,003,045                       | -49,190,426,894                        | -57,051,141,690    | -6,470,265,463     | -11,321,986,579 | -4,993,036,206  | -49,488,940,389  | -21,093,956,048           | -4,771,495,740  | -4,482,037,762  |
| Baseline per AE per day         | 2.63              | 2.67                                  | 2.60                                   | 2.92               | 2.08               | 2.05            | 2.25            | 2.58             | 2.72                      | 2.77            | 2.60            |
| Reformulated per AE per day     | 0.95              | 0.97                                  | 0.94                                   | 1.06               | 0.75               | 0.74            | 0.82            | 0.93             | 0.99                      | 1.00            | 0.94            |
| Change per AE per day           | -1.68             | -1.70                                 | -1.66                                  | -1.86              | -1.33              | -1.31           | -1.44           | -1.64            | -1.74                     | -1.77           | -1.66           |
| Percent change per AE per day   | -63.88%           | -63.67%                               | -63.85%                                | -63.70%            | -63.94%            | -63.90%         | -64.00%         | -63.57%          | -63.97%                   | -63.90%         | -63.85%         |
| Sodium (mg)                     |                   |                                       |                                        |                    |                    |                 |                 |                  |                           |                 |                 |
| Baseline (2014 average product) | 525,287,419,714   | 201,636,770,033                       | 323,650,649,680                        | 375,370,579,986    | 42,571,405,718     | 74,493,525,334  | 32,851,908,676  | 325,614,732,785  | 138,788,642,634           | 31,394,273,108  | 29,489,771,187  |
| Reformulated healthier product  | 605,123,849,653   | 232,282,773,078                       | 372,841,076,575                        | 432,421,721,676    | 49,041,671,181     | 85,815,511,913  | 37,844,944,883  | 375,103,673,174  | 159,882,598,682           | 36,165,768,848  | 33,971,808,949  |
| Total change                    | 79,836,429,939    | 30,646,003,045                        | 49,190,426,894                         | 57,051,141,690     | 6,470,265,463      | 11,321,986,579  | 4,993,036,206   | 49,488,940,389   | 21,093,956,048            | 4,771,495,740   | 4,482,037,762   |
| Baseline per AE per day         | 11.02             | 11.20                                 | 10.92                                  | 12.25              | 8.73               | 8.61            | 9.45            | 10.82            | 11.42                     | 11.63           | 10.89           |
| Reformulated per AE per day     | 12.70             | 12.90                                 | 12.58                                  | 14.11              | 10.05              | 9.92            | 10.88           | 12.46            | 13.16                     | 13.40           | 12.55           |
| Change per AE per day           | 1.68              | 1.70                                  | 1.66                                   | 1.86               | 1.33               | 1.31            | 1.44            | 1.64             | 1.74                      | 1.77            | 1.66            |
| Percent change per AE per day   | 15.25%            | 15.18%                                | 15.20%                                 | 15.18%             | 15.23%             | 15.21%          | 15.24%          | 15.16%           | 15.24%                    | 15.22%          | 15.24%          |
| Dietary Fiber (g)               |                   |                                       |                                        |                    |                    |                 |                 |                  |                           |                 |                 |
| Baseline (2014 average product) | 4,536,160,792     | 1,741,250,173                         | 2,794,910,619                          | 3,241,542,142      | 367,628,720        | 643,294,692     | 283,695,239     | 2,811,871,613    | 1,198,520,230             | 271,107,713     | 254,661,237     |
| Reformulated healthier product  | 33,567,589,861    | 12,885,251,280                        | 20,682,338,581                         | 23,987,411,847     | 2,720,452,524      | 4,760,380,721   | 2,099,344,769   | 20,807,849,936   | 8,869,049,702             | 2,006,197,073   | 1,884,493,150   |
| Total change                    | 29,031,429,069    | 11,144,001,107                        | 17,887,427,962                         | 20,745,869,706     | 2,352,823,805      | 4,117,086,029   | 1,815,649,530   | 17,995,978,323   | 7,670,529,472             | 1,735,089,360   | 1,629,831,914   |
| Baseline per AE per day         | 0.10              | 0.10                                  | 0.09                                   | 0.11               | 0.08               | 0.07            | 0.08            | 0.09             | 0.10                      | 0.10            | 0.09            |
| Reformulated per AE per day     | 0.70              | 0.72                                  | 0.70                                   | 0.78               | 0.56               | 0.55            | 0.60            | 0.69             | 0.73                      | 0.74            | 0.70            |
| Change per AE per day           | 0.61              | 0.62                                  | 0.60                                   | 0.68               | 0.48               | 0.48            | 0.52            | 0.60             | 0.63                      | 0.64            | 0.60            |
| Percent change per AE per day   | 610.00%           | 620.00%                               | 666.67%                                | 618.18%            | 600.00%            | 685.71%         | 650.00%         | 666.67%          | 630.00%                   | 640.00%         | 666.67%         |

Potential Improvements from Reformulation of **Macaroni & Cheese Mix** by Demographic Group for Consumer Network Households with Children (Weighted), 2014

|                                 | All Households  | Low Income (<185%<br>of Poverty Line) | High Income (>185%<br>of Poverty Line) | Non-Hispanic White | Non-Hispanic Black | Hispanic        | Asian and Other | Urban           | Part Urban<br>/Part Rural | Rural          | Unspecified    |
|---------------------------------|-----------------|---------------------------------------|----------------------------------------|--------------------|--------------------|-----------------|-----------------|-----------------|---------------------------|----------------|----------------|
| <b>1-Star Targets</b>           |                 |                                       |                                        |                    |                    |                 |                 |                 |                           |                |                |
| <b>Calories</b>                 |                 |                                       |                                        |                    |                    |                 |                 |                 |                           |                |                |
| Baseline (2014 average product) | 342,422,841,273 | 142,748,774,961                       | 199,674,066,312                        | 255,388,691,041    | 22,495,336,337     | 46,315,069,942  | 18,223,743,953  | 207,100,349,158 | 94,828,030,337            | 20,538,836,047 | 19,955,625,731 |
| Reformulated healthier product  | 347,169,020,075 | 144,727,355,617                       | 202,441,664,459                        | 258,928,526,139    | 22,807,134,721     | 46,957,023,622  | 18,476,335,593  | 209,970,879,884 | 96,142,401,731            | 20,823,516,205 | 20,232,222,255 |
| Total change                    | 4,746,178,803   | 1,978,580,656                         | 2,767,598,147                          | 3,539,835,098      | 311,798,384        | 641,953,680     | 252,591,641     | 2,870,530,726   | 1,314,371,395             | 284,680,157    | 276,596,525    |
| Baseline per AE per day         | 7.18            | 7.93                                  | 6.73                                   | 8.33               | 4.61               | 5.35            | 5.24            | 6.88            | 7.80                      | 7.61           | 7.37           |
| Reformulated per AE per day     | 7.28            | 8.04                                  | 6.83                                   | 8.45               | 4.67               | 5.43            | 5.31            | 6.98            | 7.91                      | 7.71           | 7.47           |
| Change per AE per day           | 0.10            | 0.11                                  | 0.09                                   | 0.12               | 0.06               | 0.07            | 0.07            | 0.10            | 0.11                      | 0.11           | 0.10           |
| Percent change per AE per day   | 1.39%           | 1.39%                                 | 1.34%                                  | 1.44%              | 1.30%              | 1.31%           | 1.34%           | 1.45%           | 1.41%                     | 1.45%          | 1.36%          |
| <b>Saturated Fat (g)</b>        |                 |                                       |                                        |                    |                    |                 |                 |                 |                           |                |                |
| Baseline (2014 average product) | 2,512,682,896   | 1,047,483,877                         | 1,465,199,019                          | 1,874,030,346      | 165,069,733        | 339,857,831     | 133,724,986     | 1,519,692,737   | 695,843,680               | 150,713,024    | 146,433,454    |
| Reformulated healthier product  | 2,512,682,896   | 1,047,483,877                         | 1,465,199,019                          | 1,874,030,346      | 165,069,733        | 339,857,831     | 133,724,986     | 1,519,692,737   | 695,843,680               | 150,713,024    | 146,433,454    |
| Total change                    | 0               | 0                                     | 0                                      | 0                  | 0                  | 0               | 0               | 0               | 0                         | 0              | 0              |
| Baseline per AE per day         | 0.05            | 0.06                                  | 0.05                                   | 0.06               | 0.03               | 0.04            | 0.04            | 0.05            | 0.06                      | 0.06           | 0.05           |
| Reformulated per AE per day     | 0.05            | 0.06                                  | 0.05                                   | 0.06               | 0.03               | 0.04            | 0.04            | 0.05            | 0.06                      | 0.06           | 0.05           |
| Change per AE per day           | 0.00            | 0.00                                  | 0.00                                   | 0.00               | 0.00               | 0.00            | 0.00            | 0.00            | 0.00                      | 0.00           | 0.00           |
| Percent change per AE per day   | 0.00%           | 0.00%                                 | 0.00%                                  | 0.00%              | 0.00%              | 0.00%           | 0.00%           | 0.00%           | 0.00%                     | 0.00%          | 0.00%          |
| <b>Sugars (g)</b>               |                 |                                       |                                        |                    |                    |                 |                 |                 |                           |                |                |
| Baseline (2014 average product) | 6,560,894,227   | 2,735,096,789                         | 3,825,797,439                          | 4,893,301,459      | 431,015,413        | 887,406,558     | 349,170,797     | 3,968,086,592   | 1,816,925,163             | 393,528,453    | 382,354,019    |
| Reformulated healthier product  | 6,421,300,733   | 2,676,903,240                         | 3,744,397,493                          | 4,789,188,662      | 421,844,872        | 868,525,568     | 341,741,631     | 3,883,659,218   | 1,778,267,181             | 385,155,507    | 374,218,827    |
| Total change                    | -139,593,494    | -58,193,549                           | -81,399,946                            | -104,112,797       | -9,170,541         | -18,880,991     | -7,429,166      | -84,427,374     | -38,657,982               | -8,372,946     | -8,135,192     |
| Baseline per AE per day         | 0.14            | 0.15                                  | 0.13                                   | 0.16               | 0.09               | 0.10            | 0.10            | 0.13            | 0.15                      | 0.15           | 0.14           |
| Reformulated per AE per day     | 0.13            | 0.15                                  | 0.13                                   | 0.16               | 0.09               | 0.10            | 0.10            | 0.13            | 0.15                      | 0.14           | 0.14           |
| Change per AE per day           | 0.00            | 0.00                                  | 0.00                                   | 0.00               | 0.00               | 0.00            | 0.00            | 0.00            | 0.00                      | 0.00           | 0.00           |
| Percent change per AE per day   | 0.00%           | 0.00%                                 | 0.00%                                  | 0.00%              | 0.00%              | 0.00%           | 0.00%           | 0.00%           | 0.00%                     | 0.00%          | 0.00%          |
| <b>Sodium (mg)</b>              |                 |                                       |                                        |                    |                    |                 |                 |                 |                           |                |                |
| Baseline (2014 average product) | 822,764,054,815 | 342,992,776,038                       | 479,771,278,777                        | 613,640,825,518    | 54,051,166,886     | 111,284,558,596 | 43,787,503,815  | 497,614,944,124 | 227,850,147,087           | 49,350,142,545 | 47,948,821,059 |
| Reformulated healthier product  | 759,528,201,942 | 316,631,098,477                       | 442,897,103,466                        | 566,477,728,477    | 49,896,911,949     | 102,731,469,855 | 40,422,091,662  | 459,369,343,566 | 210,338,081,150           | 45,557,198,098 | 44,263,579,128 |
| Total change                    | -63,235,852,873 | -26,361,677,561                       | -36,874,175,312                        | -47,163,097,041    | -4,154,254,937     | -8,553,088,742  | -3,365,412,153  | -38,245,600,558 | -17,512,065,937           | -3,792,944,447 | -3,685,241,931 |
| Baseline per AE per day         | 17.26           | 19.04                                 | 16.18                                  | 20.02              | 11.08              | 12.86           | 12.59           | 16.53           | 18.75                     | 18.28          | 17.71          |
| Reformulated per AE per day     | 15.94           | 17.58                                 | 14.94                                  | 18.48              | 10.23              | 11.87           | 11.62           | 15.26           | 17.31                     | 16.88          | 16.35          |
| Change per AE per day           | -1.33           | -1.46                                 | -1.24                                  | -1.54              | -0.85              | -0.99           | -0.97           | -1.27           | -1.44                     | -1.41          | -1.36          |
| Percent change per AE per day   | -7.71%          | -7.67%                                | -7.66%                                 | -7.69%             | -7.67%             | -7.70%          | -7.70%          | -7.68%          | -7.68%                    | -7.71%         | -7.68%         |
| <b>Dietary Fiber (g)</b>        |                 |                                       |                                        |                    |                    |                 |                 |                 |                           |                |                |
| Baseline (2014 average product) | 2,233,495,907   | 931,096,779                           | 1,302,399,128                          | 1,665,804,752      | 146,728,651        | 302,095,850     | 118,866,654     | 1,350,837,989   | 618,527,715               | 133,967,133    | 130,163,070    |
| Reformulated healthier product  | 3,629,430,849   | 1,513,032,266                         | 2,116,398,583                          | 2,706,932,722      | 238,434,058        | 490,905,756     | 193,158,313     | 2,195,111,732   | 1,005,107,537             | 217,696,591    | 211,514,989    |
| Total change                    | 1,395,934,942   | 581,935,487                           | 813,999,455                            | 1,041,127,970      | 91,705,407         | 188,809,906     | 74,291,659      | 844,273,743     | 386,579,822               | 83,729,458     | 81,351,919     |
| Baseline per AE per day         | 0.05            | 0.05                                  | 0.04                                   | 0.05               | 0.03               | 0.03            | 0.03            | 0.04            | 0.05                      | 0.05           | 0.05           |
| Reformulated per AE per day     | 0.08            | 0.08                                  | 0.07                                   | 0.09               | 0.05               | 0.06            | 0.06            | 0.07            | 0.08                      | 0.08           | 0.08           |
| Change per AE per day           | 0.03            | 0.03                                  | 0.03                                   | 0.03               | 0.02               | 0.02            | 0.02            | 0.03            | 0.03                      | 0.03           | 0.03           |
| Percent change per AE per day   | 60.00%          | 60.00%                                | 75.00%                                 | 60.00%             | 66.67%             | 66.67%          | 66.67%          | 75.00%          | 60.00%                    | 60.00%         | 60.00%         |



Potential Improvements from Reformulation of Frozen Pizza by Demographic Group for Consumer Network Households with Children (Weighted), 2014

|                                 | All Households    | Low Income (<185%<br>of Poverty Line) | High Income (>185%<br>of Poverty Line) | Non-Hispanic White | Non-Hispanic Black | Hispanic        | Asian and Other | Urban            | Part Urban<br>/Part Rural | Rural           | Unspecified     |
|---------------------------------|-------------------|---------------------------------------|----------------------------------------|--------------------|--------------------|-----------------|-----------------|------------------|---------------------------|-----------------|-----------------|
| <b>1-Star Targets</b>           |                   |                                       |                                        |                    |                    |                 |                 |                  |                           |                 |                 |
| <b>Calories</b>                 |                   |                                       |                                        |                    |                    |                 |                 |                  |                           |                 |                 |
| Baseline (2014 average product) | 539,085,542,331   | 224,957,292,209                       | 314,128,250,122                        | 394,471,616,377    | 44,427,170,342     | 73,942,959,470  | 26,243,795,805  | 305,792,069,168  | 161,122,601,907           | 38,713,446,215  | 33,457,425,041  |
| Reformulated healthier product  | 535,246,357,460   | 223,355,222,472                       | 311,891,134,988                        | 391,662,322,967    | 44,110,775,064     | 73,416,362,726  | 26,056,896,369  | 303,614,321,494  | 159,975,141,241           | 38,437,742,147  | 33,219,152,578  |
| Total change                    | -3,839,184,871    | -1,602,069,737                        | -2,237,115,134                         | -2,809,293,410     | -316,395,278       | -526,596,744    | -186,899,436    | -2,177,747,674   | -1,147,460,666            | -275,704,068    | -238,272,463    |
| Baseline per AE per day         | 11.31             | 12.49                                 | 10.59                                  | 12.87              | 9.11               | 8.55            | 7.55            | 10.16            | 13.26                     | 14.34           | 12.36           |
| Reformulated per AE per day     | 11.23             | 12.40                                 | 10.52                                  | 12.78              | 9.04               | 8.49            | 7.49            | 10.09            | 13.17                     | 14.24           | 12.27           |
| Change per AE per day           | -0.08             | -0.09                                 | -0.08                                  | -0.09              | -0.06              | -0.06           | -0.05           | -0.07            | -0.09                     | -0.10           | -0.09           |
| Percent change per AE per day   | -0.71%            | -0.72%                                | -0.76%                                 | -0.70%             | -0.66%             | -0.70%          | -0.66%          | -0.69%           | -0.68%                    | -0.70%          | -0.73%          |
| <b>Saturated Fat (g)</b>        |                   |                                       |                                        |                    |                    |                 |                 |                  |                           |                 |                 |
| Baseline (2014 average product) | 9,437,996,142     | 3,938,421,436                         | 5,499,574,705                          | 6,906,179,634      | 777,805,059        | 1,294,550,329   | 459,461,114     | 5,353,629,698    | 2,820,840,805             | 677,772,501     | 585,753,139     |
| Reformulated healthier product  | 7,518,403,706     | 3,137,386,568                         | 4,381,017,138                          | 5,501,532,929      | 619,607,420        | 1,031,251,957   | 366,011,396     | 4,264,755,861    | 2,247,110,472             | 539,920,467     | 466,616,907     |
| Total change                    | -1,919,592,436    | -801,034,868                          | -1,118,557,567                         | -1,404,646,705     | -158,197,639       | -263,298,372    | -93,449,718     | -1,088,873,837   | -573,730,333              | -137,852,034    | -119,136,232    |
| Baseline per AE per day         | 0.20              | 0.22                                  | 0.19                                   | 0.23               | 0.16               | 0.15            | 0.13            | 0.18             | 0.23                      | 0.25            | 0.22            |
| Reformulated per AE per day     | 0.16              | 0.17                                  | 0.15                                   | 0.18               | 0.13               | 0.12            | 0.11            | 0.14             | 0.18                      | 0.20            | 0.17            |
| Change per AE per day           | -0.04             | -0.04                                 | -0.04                                  | -0.05              | -0.03              | -0.03           | -0.03           | -0.04            | -0.05                     | -0.05           | -0.04           |
| Percent change per AE per day   | -20.00%           | -18.18%                               | -21.05%                                | -21.74%            | -18.75%            | -20.00%         | -23.08%         | -22.22%          | -21.74%                   | -20.00%         | -18.18%         |
| <b>Sugars (g)</b>               |                   |                                       |                                        |                    |                    |                 |                 |                  |                           |                 |                 |
| Baseline (2014 average product) | 6,718,573,525     | 2,803,622,039                         | 3,914,951,485                          | 4,916,263,468      | 553,691,737        | 921,544,302     | 327,074,013     | 3,811,058,429    | 2,008,056,166             | 482,482,119     | 416,976,811     |
| Reformulated healthier product  | 4,639,015,053     | 1,935,834,265                         | 2,703,180,787                          | 3,394,562,871      | 382,310,961        | 636,304,399     | 225,836,819     | 2,631,445,106    | 1,386,514,972             | 333,142,416     | 287,912,560     |
| Total change                    | -2,079,558,472    | -867,787,774                          | -1,211,770,698                         | -1,521,700,597     | -171,380,776       | -285,239,903    | -101,237,195    | -1,179,613,323   | -621,541,194              | -149,339,704    | -129,064,251    |
| Baseline per AE per day         | 0.14              | 0.16                                  | 0.13                                   | 0.16               | 0.11               | 0.11            | 0.09            | 0.13             | 0.17                      | 0.18            | 0.15            |
| Reformulated per AE per day     | 0.10              | 0.11                                  | 0.09                                   | 0.11               | 0.08               | 0.07            | 0.06            | 0.09             | 0.11                      | 0.12            | 0.11            |
| Change per AE per day           | -0.04             | -0.05                                 | -0.04                                  | -0.05              | -0.04              | -0.03           | -0.03           | -0.04            | -0.05                     | -0.06           | -0.05           |
| Percent change per AE per day   | -28.57%           | -31.25%                               | -30.77%                                | -31.25%            | -36.36%            | -27.27%         | -33.33%         | -30.77%          | -29.41%                   | -33.33%         | -33.33%         |
| <b>Sodium (mg)</b>              |                   |                                       |                                        |                    |                    |                 |                 |                  |                           |                 |                 |
| Baseline (2014 average product) | 1,173,510,842,297 | 489,699,316,215                       | 683,811,526,082                        | 858,707,352,446    | 96,711,490,098     | 160,963,071,416 | 57,128,927,604  | 665,664,872,230  | 350,740,477,030           | 84,273,543,452  | 72,831,949,585  |
| Reformulated healthier product  | 936,441,176,500   | 390,771,509,968                       | 545,669,666,532                        | 685,233,484,353    | 77,174,081,656     | 128,445,722,474 | 45,587,887,431  | 531,188,953,386  | 279,884,780,879           | 67,248,817,253  | 58,118,624,982  |
| Total change                    | -237,069,665,797  | -98,927,806,247                       | -138,141,859,549                       | -173,473,868,092   | -19,537,408,441    | -32,517,348,942 | -11,541,040,173 | -134,475,918,845 | -70,855,696,150           | -17,024,726,199 | -14,713,324,603 |
| Baseline per AE per day         | 24.62             | 27.19                                 | 23.06                                  | 28.02              | 19.82              | 18.60           | 16.43           | 22.11            | 28.87                     | 31.22           | 26.90           |
| Reformulated per AE per day     | 19.65             | 21.70                                 | 18.40                                  | 22.36              | 15.82              | 14.85           | 13.11           | 17.65            | 23.03                     | 24.91           | 21.47           |
| Change per AE per day           | -4.97             | -5.49                                 | -4.66                                  | -5.66              | -4.00              | -3.76           | -3.32           | -4.47            | -5.83                     | -6.31           | -5.43           |
| Percent change per AE per day   | -20.19%           | -20.19%                               | -20.21%                                | -20.20%            | -20.18%            | -20.22%         | -20.21%         | -20.22%          | -20.19%                   | -20.21%         | -20.19%         |
| <b>Dietary Fiber (g)</b>        |                   |                                       |                                        |                    |                    |                 |                 |                  |                           |                 |                 |
| Baseline (2014 average product) | 3,679,218,835     | 1,535,316,831                         | 2,143,902,004                          | 2,692,239,518      | 303,212,142        | 504,655,213     | 179,111,960     | 2,087,008,187    | 1,099,649,805             | 264,216,399     | 228,344,444     |
| Reformulated healthier product  | 8,478,199,924     | 3,537,904,002                         | 4,940,295,922                          | 6,203,856,281      | 698,706,240        | 1,162,901,143   | 412,736,255     | 4,809,192,779    | 2,533,975,638             | 608,846,484     | 526,185,023     |
| Total change                    | 4,798,981,089     | 2,002,587,171                         | 2,796,393,918                          | 3,511,616,763      | 395,494,098        | 658,245,930     | 233,624,295     | 2,722,184,592    | 1,434,325,833             | 344,630,085     | 297,840,579     |
| Baseline per AE per day         | 0.08              | 0.09                                  | 0.07                                   | 0.09               | 0.06               | 0.06            | 0.05            | 0.07             | 0.09                      | 0.10            | 0.08            |
| Reformulated per AE per day     | 0.18              | 0.20                                  | 0.17                                   | 0.20               | 0.14               | 0.13            | 0.12            | 0.16             | 0.21                      | 0.23            | 0.19            |
| Change per AE per day           | 0.10              | 0.11                                  | 0.09                                   | 0.11               | 0.08               | 0.08            | 0.07            | 0.09             | 0.12                      | 0.13            | 0.11            |
| Percent change per AE per day   | 125.00%           | 122.22%                               | 128.57%                                | 122.22%            | 133.33%            | 133.33%         | 140.00%         | 128.57%          | 133.33%                   | 130.00%         | 137.50%         |

Potential Improvements from Reformulation of **Potato Chips** by Demographic Group for Consumer Network Households with Children (Weighted), 2014

|                                 | All Households   | Low Income (<185%<br>of Poverty Line) | High Income (>185%<br>of Poverty Line) | Non-Hispanic White | Non-Hispanic Black | Hispanic        | Asian and Other | Urban            | Part Urban<br>/Part Rural | Rural           | Unspecified     |
|---------------------------------|------------------|---------------------------------------|----------------------------------------|--------------------|--------------------|-----------------|-----------------|------------------|---------------------------|-----------------|-----------------|
| <b>1-Star Targets</b>           |                  |                                       |                                        |                    |                    |                 |                 |                  |                           |                 |                 |
| <b>Calories</b>                 |                  |                                       |                                        |                    |                    |                 |                 |                  |                           |                 |                 |
| Baseline (2014 average product) | 575,531,150,604  | 225,923,364,946                       | 349,607,785,658                        | 404,758,934,448    | 58,708,647,991     | 77,757,790,691  | 34,305,777,475  | 344,431,200,217  | 159,742,047,558           | 38,623,018,894  | 32,734,883,936  |
| Reformulated healthier product  | 566,316,509,100  | 222,306,179,650                       | 344,010,329,450                        | 398,278,471,188    | 57,768,682,980     | 76,512,836,070  | 33,756,518,863  | 338,916,624,630  | 157,184,469,745           | 38,004,638,338  | 32,210,776,388  |
| Total change                    | -9,214,641,504   | -3,617,185,296                        | -5,597,456,208                         | -6,480,463,260     | -939,965,011       | -1,244,954,621  | -549,258,612    | -5,514,575,587   | -2,557,577,813            | -618,380,556    | -524,107,548    |
| Baseline per AE per day         | 12.08            | 12.54                                 | 11.79                                  | 13.21              | 12.03              | 8.99            | 9.86            | 11.44            | 13.15                     | 14.31           | 12.09           |
| Reformulated per AE per day     | 11.88            | 12.34                                 | 11.60                                  | 12.99              | 11.84              | 8.84            | 9.71            | 11.26            | 12.94                     | 14.08           | 11.90           |
| Change per AE per day           | -0.19            | -0.20                                 | -0.19                                  | -0.21              | -0.19              | -0.14           | -0.16           | -0.18            | -0.21                     | -0.23           | -0.19           |
| Percent change per AE per day   | -1.57%           | -1.59%                                | -1.61%                                 | -1.59%             | -1.58%             | -1.56%          | -1.62%          | -1.57%           | -1.60%                    | -1.61%          | -1.57%          |
| <b>Saturated Fat (g)</b>        |                  |                                       |                                        |                    |                    |                 |                 |                  |                           |                 |                 |
| Baseline (2014 average product) | 6,910,981,128    | 2,712,888,972                         | 4,198,092,156                          | 4,860,347,445      | 704,973,758        | 933,715,966     | 411,943,959     | 4,135,931,690    | 1,918,183,360             | 463,785,417     | 393,080,661     |
| Reformulated healthier product  | 4,607,320,752    | 1,808,592,648                         | 2,798,728,104                          | 3,240,231,630      | 469,982,506        | 622,477,310     | 274,629,306     | 2,757,287,794    | 1,278,788,906             | 309,190,278     | 262,053,774     |
| Total change                    | -2,303,660,376   | -904,296,324                          | -1,399,364,052                         | -1,620,115,815     | -234,991,253       | -311,238,655    | -137,314,653    | -1,378,643,897   | -639,394,453              | -154,595,139    | -131,026,887    |
| Baseline per AE per day         | 0.15             | 0.15                                  | 0.14                                   | 0.16               | 0.14               | 0.11            | 0.12            | 0.14             | 0.16                      | 0.17            | 0.15            |
| Reformulated per AE per day     | 0.10             | 0.10                                  | 0.09                                   | 0.11               | 0.10               | 0.07            | 0.08            | 0.09             | 0.11                      | 0.11            | 0.10            |
| Change per AE per day           | -0.05            | -0.05                                 | -0.05                                  | -0.05              | -0.05              | -0.04           | -0.04           | -0.05            | -0.05                     | -0.06           | -0.05           |
| Percent change per AE per day   | -33.33%          | -33.33%                               | -35.71%                                | -31.25%            | -35.71%            | -36.36%         | -33.33%         | -35.71%          | -31.25%                   | -35.29%         | -33.33%         |
| <b>Sugars (g)</b>               |                  |                                       |                                        |                    |                    |                 |                 |                  |                           |                 |                 |
| Baseline (2014 average product) | 3,455,490,564    | 1,356,444,486                         | 2,099,046,078                          | 2,430,173,723      | 352,486,879        | 466,857,983     | 205,971,980     | 2,067,965,845    | 959,091,680               | 231,892,709     | 196,540,331     |
| Reformulated healthier product  | 1,919,716,980    | 753,580,270                           | 1,166,136,710                          | 1,350,096,513      | 195,826,044        | 259,365,546     | 114,428,878     | 1,148,869,914    | 532,828,711               | 128,829,283     | 109,189,073     |
| Total change                    | -1,535,773,584   | -602,864,216                          | -932,909,368                           | -1,080,077,210     | -156,660,835       | -207,492,437    | -91,543,102     | -919,095,931     | -426,262,969              | -103,063,426    | -87,351,258     |
| Baseline per AE per day         | 0.07             | 0.08                                  | 0.07                                   | 0.08               | 0.07               | 0.05            | 0.06            | 0.07             | 0.08                      | 0.09            | 0.07            |
| Reformulated per AE per day     | 0.04             | 0.04                                  | 0.04                                   | 0.04               | 0.04               | 0.03            | 0.03            | 0.04             | 0.04                      | 0.05            | 0.04            |
| Change per AE per day           | -0.03            | -0.03                                 | -0.03                                  | -0.04              | -0.03              | -0.02           | -0.03           | -0.03            | -0.04                     | -0.04           | -0.03           |
| Percent change per AE per day   | -42.86%          | -37.50%                               | -42.86%                                | -50.00%            | -42.86%            | -40.00%         | -50.00%         | -42.86%          | -50.00%                   | -44.44%         | -42.86%         |
| <b>Sodium (mg)</b>              |                  |                                       |                                        |                    |                    |                 |                 |                  |                           |                 |                 |
| Baseline (2014 average product) | 741,010,754,280  | 290,881,984,220                       | 450,128,770,060                        | 521,137,253,825    | 75,588,852,984     | 100,115,100,756 | 44,169,546,715  | 443,463,786,804  | 205,671,882,446           | 49,728,103,045  | 42,146,981,985  |
| Reformulated healthier product  | 518,707,527,996  | 203,617,388,954                       | 315,090,139,042                        | 364,796,077,678    | 52,912,197,089     | 70,080,570,529  | 30,918,682,701  | 310,424,650,763  | 143,970,317,712           | 34,809,672,132  | 29,502,887,390  |
| Total change                    | -222,303,226,284 | -87,264,595,266                       | -135,038,631,018                       | -156,341,176,148   | -22,676,655,895    | -30,034,530,227 | -13,250,864,015 | -133,039,136,041 | -61,701,564,734           | -14,918,430,914 | -12,644,094,596 |
| Baseline per AE per day         | 15.55            | 16.15                                 | 15.18                                  | 17.00              | 15.49              | 11.57           | 12.70           | 14.73            | 16.93                     | 18.42           | 15.57           |
| Reformulated per AE per day     | 10.88            | 11.31                                 | 10.63                                  | 11.90              | 10.84              | 8.10            | 8.89            | 10.31            | 11.85                     | 12.90           | 10.90           |
| Change per AE per day           | -4.66            | -4.85                                 | -4.55                                  | -5.10              | -4.65              | -3.47           | -3.81           | -4.42            | -5.08                     | -5.53           | -4.67           |
| Percent change per AE per day   | -29.97%          | -30.03%                               | -29.97%                                | -30.00%            | -30.02%            | -29.99%         | -30.00%         | -30.01%          | -30.01%                   | -30.02%         | -29.99%         |
| <b>Dietary Fiber (g)</b>        |                  |                                       |                                        |                    |                    |                 |                 |                  |                           |                 |                 |
| Baseline (2014 average product) | 3,839,433,960    | 1,507,160,540                         | 2,332,273,420                          | 2,700,193,025      | 391,652,088        | 518,731,092     | 228,857,755     | 2,297,739,828    | 1,065,657,422             | 257,658,565     | 218,378,145     |
| Reformulated healthier product  | 4,607,320,752    | 1,808,592,648                         | 2,798,728,104                          | 3,240,231,630      | 469,982,506        | 622,477,310     | 274,629,306     | 2,757,287,794    | 1,278,788,906             | 309,190,278     | 262,053,774     |
| Total change                    | 767,886,792      | 301,432,108                           | 466,454,684                            | 540,038,605        | 78,330,418         | 103,746,218     | 45,771,551      | 459,547,966      | 213,131,484               | 51,531,713      | 43,675,629      |
| Baseline per AE per day         | 0.08             | 0.08                                  | 0.08                                   | 0.09               | 0.08               | 0.06            | 0.07            | 0.08             | 0.09                      | 0.10            | 0.08            |
| Reformulated per AE per day     | 0.10             | 0.10                                  | 0.09                                   | 0.11               | 0.10               | 0.07            | 0.08            | 0.09             | 0.11                      | 0.11            | 0.10            |
| Change per AE per day           | 0.02             | 0.02                                  | 0.02                                   | 0.02               | 0.02               | 0.01            | 0.01            | 0.02             | 0.02                      | 0.02            | 0.02            |
| Percent change per AE per day   | 25.00%           | 25.00%                                | 25.00%                                 | 22.22%             | 25.00%             | 16.67%          | 14.29%          | 25.00%           | 22.22%                    | 20.00%          | 25.00%          |

Potential Improvements from Reformulation of **Potato Chips** by Demographic Group for Consumer Network Households with Children (Weighted), 2014

|                                 | All Households   | Low Income (<185%<br>of Poverty Line) | High Income (>185%<br>of Poverty Line) | Non-Hispanic White | Non-Hispanic Black | Hispanic        | Asian and Other | Urban            | Part Urban<br>/Part Rural | Rural           | Unspecified     |
|---------------------------------|------------------|---------------------------------------|----------------------------------------|--------------------|--------------------|-----------------|-----------------|------------------|---------------------------|-----------------|-----------------|
| <b>2-Star Targets</b>           |                  |                                       |                                        |                    |                    |                 |                 |                  |                           |                 |                 |
| <b>Calories</b>                 |                  |                                       |                                        |                    |                    |                 |                 |                  |                           |                 |                 |
| Baseline (2014 average product) | 575,531,150,604  | 225,923,364,946                       | 349,607,785,658                        | 404,758,934,448    | 58,708,647,991     | 77,757,790,691  | 34,305,777,475  | 344,431,200,217  | 159,742,047,558           | 38,623,018,894  | 32,734,883,936  |
| Reformulated healthier product  | 539,056,527,984  | 211,605,339,816                       | 327,451,188,168                        | 379,107,100,710    | 54,987,953,155     | 72,829,845,317  | 32,131,628,802  | 322,602,671,851  | 149,618,302,049           | 36,175,262,526  | 30,660,291,558  |
| Total change                    | -36,474,622,620  | -14,318,025,130                       | -22,156,597,490                        | -25,651,833,738    | -3,720,694,836     | -4,927,945,374  | -2,174,148,673  | -21,828,528,366  | -10,123,745,509           | -2,447,756,368  | -2,074,592,378  |
| Baseline per AE per day         | 12.08            | 12.54                                 | 11.79                                  | 13.21              | 12.03              | 8.99            | 9.86            | 11.44            | 13.15                     | 14.31           | 12.09           |
| Reformulated per AE per day     | 11.31            | 11.75                                 | 11.04                                  | 12.37              | 11.27              | 8.42            | 9.24            | 10.72            | 12.31                     | 13.40           | 11.32           |
| Change per AE per day           | -0.77            | -0.79                                 | -0.75                                  | -0.84              | -0.76              | -0.57           | -0.63           | -0.73            | -0.83                     | -0.91           | -0.77           |
| Percent change per AE per day   | -6.37%           | -6.30%                                | -6.36%                                 | -6.36%             | -6.32%             | -6.34%          | -6.39%          | -6.38%           | -6.31%                    | -6.36%          | -6.37%          |
| <b>Saturated Fat (g)</b>        |                  |                                       |                                        |                    |                    |                 |                 |                  |                           |                 |                 |
| Baseline (2014 average product) | 6,910,981,128    | 2,712,888,972                         | 4,198,092,156                          | 4,860,347,445      | 704,973,758        | 933,715,966     | 411,943,959     | 4,135,931,690    | 1,918,183,360             | 463,785,417     | 393,080,661     |
| Reformulated healthier product  | 3,455,490,564    | 1,356,444,486                         | 2,099,046,078                          | 2,430,173,723      | 352,486,879        | 466,857,983     | 205,971,980     | 2,067,965,845    | 959,091,680               | 231,892,709     | 196,540,331     |
| Total change                    | -3,455,490,564   | -1,356,444,486                        | -2,099,046,078                         | -2,430,173,723     | -352,486,879       | -466,857,983    | -205,971,980    | -2,067,965,845   | -959,091,680              | -231,892,709    | -196,540,331    |
| Baseline per AE per day         | 0.15             | 0.15                                  | 0.14                                   | 0.16               | 0.14               | 0.11            | 0.12            | 0.14             | 0.16                      | 0.17            | 0.15            |
| Reformulated per AE per day     | 0.07             | 0.08                                  | 0.07                                   | 0.08               | 0.07               | 0.05            | 0.06            | 0.07             | 0.08                      | 0.09            | 0.07            |
| Change per AE per day           | -0.07            | -0.08                                 | -0.07                                  | -0.08              | -0.07              | -0.05           | -0.06           | -0.07            | -0.08                     | -0.09           | -0.07           |
| Percent change per AE per day   | -46.67%          | -53.33%                               | -50.00%                                | -50.00%            | -50.00%            | -45.45%         | -50.00%         | -50.00%          | -50.00%                   | -52.94%         | -46.67%         |
| <b>Sugars (g)</b>               |                  |                                       |                                        |                    |                    |                 |                 |                  |                           |                 |                 |
| Baseline (2014 average product) | 3,455,490,564    | 1,356,444,486                         | 2,099,046,078                          | 2,430,173,723      | 352,486,879        | 466,857,983     | 205,971,980     | 2,067,965,845    | 959,091,680               | 231,892,709     | 196,540,331     |
| Reformulated healthier product  | 1,151,830,188    | 452,148,162                           | 699,682,026                            | 810,057,908        | 117,495,626        | 155,619,328     | 68,657,327      | 689,321,948      | 319,697,227               | 77,297,570      | 65,513,444      |
| Total change                    | -2,303,660,376   | -904,296,324                          | -1,399,364,052                         | -1,620,115,815     | -234,991,253       | -311,238,655    | -137,314,653    | -1,378,643,897   | -639,394,453              | -154,595,139    | -131,026,887    |
| Baseline per AE per day         | 0.07             | 0.08                                  | 0.07                                   | 0.08               | 0.07               | 0.05            | 0.06            | 0.07             | 0.08                      | 0.09            | 0.07            |
| Reformulated per AE per day     | 0.02             | 0.03                                  | 0.02                                   | 0.03               | 0.02               | 0.02            | 0.02            | 0.02             | 0.03                      | 0.03            | 0.02            |
| Change per AE per day           | -0.05            | -0.05                                 | -0.05                                  | -0.05              | -0.05              | -0.04           | -0.04           | -0.05            | -0.05                     | -0.06           | -0.05           |
| Percent change per AE per day   | -71.43%          | -62.50%                               | -71.43%                                | -62.50%            | -71.43%            | -80.00%         | -66.67%         | -71.43%          | -62.50%                   | -66.67%         | -71.43%         |
| <b>Sodium (mg)</b>              |                  |                                       |                                        |                    |                    |                 |                 |                  |                           |                 |                 |
| Baseline (2014 average product) | 741,010,754,280  | 290,881,984,220                       | 450,128,770,060                        | 521,137,253,825    | 75,588,852,984     | 100,115,100,756 | 44,169,546,715  | 443,463,786,804  | 205,671,882,446           | 49,728,103,045  | 42,146,981,985  |
| Reformulated healthier product  | 523,698,792,144  | 205,576,697,656                       | 318,122,094,488                        | 368,306,328,610    | 53,421,344,803     | 70,754,920,949  | 31,216,197,782  | 313,411,712,539  | 145,355,672,361           | 35,144,628,266  | 29,786,778,978  |
| Total change                    | -217,311,962,136 | -85,305,286,564                       | -132,006,675,572                       | -152,830,925,215   | -22,167,508,181    | -29,360,179,807 | -12,953,348,933 | -130,052,074,265 | -60,316,210,085           | -14,583,474,779 | -12,360,203,007 |
| Baseline per AE per day         | 15.55            | 16.15                                 | 15.18                                  | 17.00              | 15.49              | 11.57           | 12.70           | 14.73            | 16.93                     | 18.42           | 15.57           |
| Reformulated per AE per day     | 10.99            | 11.41                                 | 10.73                                  | 12.02              | 10.95              | 8.18            | 8.98            | 10.41            | 11.96                     | 13.02           | 11.00           |
| Change per AE per day           | -4.56            | -4.74                                 | -4.45                                  | -4.99              | -4.54              | -3.39           | -3.72           | -4.32            | -4.96                     | -5.40           | -4.57           |
| Percent change per AE per day   | -29.32%          | -29.35%                               | -29.31%                                | -29.35%            | -29.31%            | -29.30%         | -29.29%         | -29.33%          | -29.30%                   | -29.32%         | -29.35%         |
| <b>Dietary Fiber (g)</b>        |                  |                                       |                                        |                    |                    |                 |                 |                  |                           |                 |                 |
| Baseline (2014 average product) | 3,839,433,960    | 1,507,160,540                         | 2,332,273,420                          | 2,700,193,025      | 391,652,088        | 518,731,092     | 228,857,755     | 2,297,739,828    | 1,065,657,422             | 257,658,565     | 218,378,145     |
| Reformulated healthier product  | 8,062,811,316    | 3,165,037,134                         | 4,897,774,182                          | 5,670,405,353      | 822,469,385        | 1,089,335,293   | 480,601,286     | 4,825,253,639    | 2,237,880,586             | 541,082,987     | 458,594,105     |
| Total change                    | 4,223,377,356    | 1,657,876,594                         | 2,565,500,762                          | 2,970,212,328      | 430,817,297        | 570,604,201     | 251,743,531     | 2,527,513,811    | 1,172,223,164             | 283,424,422     | 240,215,960     |
| Baseline per AE per day         | 0.08             | 0.08                                  | 0.08                                   | 0.09               | 0.08               | 0.06            | 0.07            | 0.08             | 0.09                      | 0.10            | 0.08            |
| Reformulated per AE per day     | 0.17             | 0.18                                  | 0.17                                   | 0.19               | 0.17               | 0.13            | 0.14            | 0.16             | 0.18                      | 0.20            | 0.17            |
| Change per AE per day           | 0.09             | 0.09                                  | 0.09                                   | 0.10               | 0.09               | 0.07            | 0.07            | 0.08             | 0.10                      | 0.11            | 0.09            |
| Percent change per AE per day   | 112.50%          | 112.50%                               | 112.50%                                | 111.11%            | 112.50%            | 116.67%         | 100.00%         | 100.00%          | 111.11%                   | 110.00%         | 112.50%         |

Potential Improvements from Reformulation of RTE Cereal by Demographic Group for Consumer Network Households with Children (Weighted), 2014

|                                 | All Households    | Low Income (<185%<br>of Poverty Line) | High Income (>185%<br>of Poverty Line) | Non-Hispanic White | Non-Hispanic Black | Hispanic        | Asian and Other | Urban             | Part Urban<br>/Part Rural | Rural           | Unspecified     |
|---------------------------------|-------------------|---------------------------------------|----------------------------------------|--------------------|--------------------|-----------------|-----------------|-------------------|---------------------------|-----------------|-----------------|
| 1-Star Targets                  |                   |                                       |                                        |                    |                    |                 |                 |                   |                           |                 |                 |
| Calories                        |                   |                                       |                                        |                    |                    |                 |                 |                   |                           |                 |                 |
| Baseline (2014 average product) | 1,855,423,092,417 | 718,161,272,917                       | 1,137,261,819,500                      | 1,299,740,531,716  | 164,396,649,068    | 290,867,066,608 | 100,418,845,025 | 1,152,484,832,817 | 491,025,217,077           | 106,902,526,435 | 105,010,516,088 |
| Reformulated healthier product  | 1,847,363,044,231 | 715,041,545,407                       | 1,132,321,498,825                      | 1,294,094,395,610  | 163,682,502,026    | 289,603,525,919 | 99,982,620,676  | 1,147,478,382,631 | 488,892,179,644           | 106,438,136,659 | 104,554,345,297 |
| Total change                    | -8,060,048,186    | -3,119,727,511                        | -4,940,320,676                         | -5,646,136,107     | -714,147,042       | -1,263,540,689  | -436,224,349    | -5,006,450,186    | -2,133,037,433            | -464,389,776    | -456,170,791    |
| Baseline per AE per day         | 38.93             | 39.87                                 | 38.36                                  | 42.40              | 33.69              | 33.62           | 28.87           | 38.29             | 40.41                     | 39.61           | 38.79           |
| Reformulated per AE per day     | 38.76             | 39.70                                 | 38.19                                  | 42.22              | 33.55              | 33.47           | 28.75           | 38.12             | 40.23                     | 39.43           | 38.62           |
| Change per AE per day           | -0.17             | -0.17                                 | -0.17                                  | -0.18              | -0.15              | -0.15           | -0.13           | -0.17             | -0.18                     | -0.17           | -0.17           |
| Percent change per AE per day   | -0.44%            | -0.43%                                | -0.44%                                 | -0.42%             | -0.45%             | -0.45%          | -0.45%          | -0.44%            | -0.45%                    | -0.43%          | -0.44%          |
| Saturated Fat (g)               |                   |                                       |                                        |                    |                    |                 |                 |                   |                           |                 |                 |
| Baseline (2014 average product) | 3,224,019,274     | 1,247,891,004                         | 1,976,128,270                          | 2,258,454,443      | 285,658,817        | 505,416,276     | 174,489,739     | 2,002,580,074     | 853,214,973               | 185,755,910     | 182,468,316     |
| Reformulated healthier product  | 3,224,019,274     | 1,247,891,004                         | 1,976,128,270                          | 2,258,454,443      | 285,658,817        | 505,416,276     | 174,489,739     | 2,002,580,074     | 853,214,973               | 185,755,910     | 182,468,316     |
| Total change                    | 0                 | 0                                     | 0                                      | 0                  | 0                  | 0               | 0               | 0                 | 0                         | 0               | 0               |
| Baseline per AE per day         | 0.07              | 0.07                                  | 0.07                                   | 0.07               | 0.06               | 0.06            | 0.05            | 0.07              | 0.07                      | 0.07            | 0.07            |
| Reformulated per AE per day     | 0.07              | 0.07                                  | 0.07                                   | 0.07               | 0.06               | 0.06            | 0.05            | 0.07              | 0.07                      | 0.07            | 0.07            |
| Change per AE per day           | 0.00              | 0.00                                  | 0.00                                   | 0.00               | 0.00               | 0.00            | 0.00            | 0.00              | 0.00                      | 0.00            | 0.00            |
| Percent change per AE per day   | 0.00%             | 0.00%                                 | 0.00%                                  | 0.00%              | 0.00%              | 0.00%           | 0.00%           | 0.00%             | 0.00%                     | 0.00%           | 0.00%           |
| Sugars (g)                      |                   |                                       |                                        |                    |                    |                 |                 |                   |                           |                 |                 |
| Baseline (2014 average product) | 128,960,770,976   | 49,915,640,168                        | 79,045,130,808                         | 90,338,177,704     | 11,426,352,672     | 20,216,651,024  | 6,979,589,576   | 80,103,202,976    | 34,128,598,928            | 7,430,236,416   | 7,298,732,656   |
| Reformulated healthier product  | 109,616,655,330   | 42,428,294,143                        | 67,188,361,187                         | 76,787,451,048     | 9,712,399,771      | 17,184,153,370  | 5,932,651,140   | 68,087,722,530    | 29,009,309,089            | 6,315,700,954   | 6,203,922,758   |
| Total change                    | -19,344,115,646   | -7,487,346,025                        | -11,856,769,621                        | -13,550,726,656    | -1,713,952,901     | -3,032,497,654  | -1,046,938,436  | -12,015,480,446   | -5,119,289,839            | -1,114,535,462  | -1,094,809,898  |
| Baseline per AE per day         | 2.71              | 2.77                                  | 2.67                                   | 2.95               | 2.34               | 2.34            | 2.01            | 2.66              | 2.81                      | 2.75            | 2.70            |
| Reformulated per AE per day     | 2.30              | 2.36                                  | 2.27                                   | 2.51               | 1.99               | 1.99            | 1.71            | 2.26              | 2.39                      | 2.34            | 2.29            |
| Change per AE per day           | -0.41             | -0.42                                 | -0.40                                  | -0.44              | -0.35              | -0.35           | -0.30           | -0.40             | -0.42                     | -0.41           | -0.40           |
| Percent change per AE per day   | -15.13%           | -15.16%                               | -14.98%                                | -14.92%            | -14.96%            | -14.96%         | -14.93%         | -15.04%           | -14.95%                   | -14.91%         | -14.81%         |
| Sodium (mg)                     |                   |                                       |                                        |                    |                    |                 |                 |                   |                           |                 |                 |
| Baseline (2014 average product) | 2,148,808,846,388 | 831,719,354,299                       | 1,317,089,492,088                      | 1,505,259,885,993  | 190,391,601,397    | 336,859,947,687 | 116,297,411,310 | 1,334,719,619,588 | 568,667,779,638           | 123,806,314,282 | 121,615,132,881 |
| Reformulated healthier product  | 1,919,903,477,905 | 743,119,093,001                       | 1,176,784,384,904                      | 1,344,909,620,568  | 170,109,825,404    | 300,975,392,120 | 103,908,639,813 | 1,192,536,434,305 | 508,089,516,541           | 110,617,644,643 | 108,659,882,416 |
| Total change                    | -228,905,368,482  | -88,600,261,298                       | -140,305,107,184                       | -160,350,265,425   | -20,281,775,993    | -35,884,555,568 | -12,388,771,497 | -142,183,185,282  | -60,578,263,097           | -13,188,669,638 | -12,955,250,464 |
| Baseline per AE per day         | 45.09             | 46.18                                 | 44.42                                  | 49.11              | 39.02              | 38.93           | 33.44           | 44.34             | 46.80                     | 45.87           | 44.92           |
| Reformulated per AE per day     | 40.28             | 41.26                                 | 39.69                                  | 43.88              | 34.86              | 34.79           | 29.88           | 39.62             | 41.81                     | 40.98           | 40.14           |
| Change per AE per day           | -4.80             | -4.92                                 | -4.73                                  | -5.23              | -4.16              | -4.15           | -3.56           | -4.72             | -4.99                     | -4.89           | -4.79           |
| Percent change per AE per day   | -10.65%           | -10.65%                               | -10.65%                                | -10.65%            | -10.66%            | -10.66%         | -10.65%         | -10.65%           | -10.66%                   | -10.66%         | -10.66%         |
| Dietary Fiber (g)               |                   |                                       |                                        |                    |                    |                 |                 |                   |                           |                 |                 |
| Baseline (2014 average product) | 32,240,192,744    | 12,478,910,042                        | 19,761,282,702                         | 22,584,544,426     | 2,856,588,168      | 5,054,162,756   | 1,744,897,394   | 20,025,800,744    | 8,532,149,732             | 1,857,559,104   | 1,824,683,164   |
| Reformulated healthier product  | 41,912,250,567    | 16,222,583,055                        | 25,689,667,513                         | 29,359,907,754     | 3,713,564,618      | 6,570,411,583   | 2,268,366,612   | 26,033,540,967    | 11,091,794,652            | 2,414,826,835   | 2,372,088,113   |
| Total change                    | 9,672,057,823     | 3,743,673,013                         | 5,928,384,811                          | 6,775,363,328      | 856,976,450        | 1,516,248,827   | 523,469,218     | 6,007,740,223     | 2,559,644,920             | 557,267,731     | 547,404,949     |
| Baseline per AE per day         | 0.68              | 0.69                                  | 0.67                                   | 0.74               | 0.59               | 0.58            | 0.50            | 0.67              | 0.70                      | 0.69            | 0.67            |
| Reformulated per AE per day     | 0.88              | 0.90                                  | 0.87                                   | 0.96               | 0.76               | 0.76            | 0.65            | 0.86              | 0.91                      | 0.89            | 0.88            |
| Change per AE per day           | 0.20              | 0.21                                  | 0.20                                   | 0.22               | 0.18               | 0.18            | 0.15            | 0.20              | 0.21                      | 0.21            | 0.20            |
| Percent change per AE per day   | 29.41%            | 30.43%                                | 29.85%                                 | 29.73%             | 30.51%             | 31.03%          | 30.00%          | 29.85%            | 30.00%                    | 30.43%          | 29.85%          |

Potential Improvements from Reformulation of RTE Cereal by Demographic Group for Consumer Network Households with Children (Weighted), 2014

|                                 | All Households    | Low Income (<185%<br>of Poverty Line) | High Income (>185%<br>of Poverty Line) | Non-Hispanic White | Non-Hispanic Black | Hispanic         | Asian and Other | Urban             | Part Urban<br>/Part Rural | Rural           | Unspecified     |
|---------------------------------|-------------------|---------------------------------------|----------------------------------------|--------------------|--------------------|------------------|-----------------|-------------------|---------------------------|-----------------|-----------------|
| 2-Star Targets                  |                   |                                       |                                        |                    |                    |                  |                 |                   |                           |                 |                 |
| Calories                        |                   |                                       |                                        |                    |                    |                  |                 |                   |                           |                 |                 |
| Baseline (2014 average product) | 1,855,423,092,417 | 718,161,272,917                       | 1,137,261,819,500                      | 1,299,740,531,716  | 164,396,649,068    | 290,867,066,608  | 100,418,845,025 | 1,152,484,832,817 | 491,025,217,077           | 106,902,526,435 | 105,010,516,088 |
| Reformulated healthier product  | 1,861,871,130,966 | 720,657,054,926                       | 1,141,214,076,041                      | 1,304,257,440,602  | 164,967,966,702    | 291,877,899,159  | 100,767,824,504 | 1,156,489,992,966 | 492,731,647,023           | 107,274,038,256 | 105,375,452,721 |
| Total change                    | 6,448,038,549     | 2,495,782,008                         | 3,952,256,540                          | 4,516,908,885      | 571,317,634        | 1,010,832,551    | 348,979,479     | 4,005,160,149     | 1,706,429,946             | 371,511,821     | 364,936,633     |
| Baseline per AE per day         | 38.93             | 39.87                                 | 38.36                                  | 42.40              | 33.69              | 33.62            | 28.87           | 38.29             | 40.41                     | 39.61           | 38.79           |
| Reformulated per AE per day     | 39.07             | 40.01                                 | 38.49                                  | 42.55              | 33.81              | 33.73            | 28.97           | 38.42             | 40.55                     | 39.74           | 38.92           |
| Change per AE per day           | 0.14              | 0.14                                  | 0.13                                   | 0.15               | 0.12               | 0.12             | 0.10            | 0.13              | 0.14                      | 0.14            | 0.13            |
| Percent change per AE per day   | 0.36%             | 0.35%                                 | 0.34%                                  | 0.35%              | 0.36%              | 0.36%            | 0.35%           | 0.34%             | 0.35%                     | 0.35%           | 0.34%           |
| Saturated Fat (g)               |                   |                                       |                                        |                    |                    |                  |                 |                   |                           |                 |                 |
| Baseline (2014 average product) | 3,224,019,274     | 1,247,891,004                         | 1,976,128,270                          | 2,258,454,443      | 285,658,817        | 505,416,276      | 174,489,739     | 2,002,580,074     | 853,214,973               | 185,755,910     | 182,468,316     |
| Reformulated healthier product  | 3,224,019,274     | 1,247,891,004                         | 1,976,128,270                          | 2,258,454,443      | 285,658,817        | 505,416,276      | 174,489,739     | 2,002,580,074     | 853,214,973               | 185,755,910     | 182,468,316     |
| Total change                    | 0                 | 0                                     | 0                                      | 0                  | 0                  | 0                | 0               | 0                 | 0                         | 0               | 0               |
| Baseline per AE per day         | 0.07              | 0.07                                  | 0.07                                   | 0.07               | 0.06               | 0.06             | 0.05            | 0.07              | 0.07                      | 0.07            | 0.07            |
| Reformulated per AE per day     | 0.07              | 0.07                                  | 0.07                                   | 0.07               | 0.06               | 0.06             | 0.05            | 0.07              | 0.07                      | 0.07            | 0.07            |
| Change per AE per day           | 0.00              | 0.00                                  | 0.00                                   | 0.00               | 0.00               | 0.00             | 0.00            | 0.00              | 0.00                      | 0.00            | 0.00            |
| Percent change per AE per day   | 0.00%             | 0.00%                                 | 0.00%                                  | 0.00%              | 0.00%              | 0.00%            | 0.00%           | 0.00%             | 0.00%                     | 0.00%           | 0.00%           |
| Sugars (g)                      |                   |                                       |                                        |                    |                    |                  |                 |                   |                           |                 |                 |
| Baseline (2014 average product) | 128,960,770,976   | 49,915,640,168                        | 79,045,130,808                         | 90,338,177,704     | 11,426,352,672     | 20,216,651,024   | 6,979,589,576   | 80,103,202,976    | 34,128,598,928            | 7,430,236,416   | 7,298,732,656   |
| Reformulated healthier product  | 87,048,520,409    | 33,693,057,113                        | 53,355,463,295                         | 60,978,269,950     | 7,712,788,054      | 13,646,239,441   | 4,711,222,964   | 54,069,662,009    | 23,036,804,276            | 5,015,409,581   | 4,926,644,543   |
| Total change                    | -41,912,250,567   | -16,222,583,055                       | -25,689,667,513                        | -29,359,907,754    | -3,713,564,618     | -6,570,411,583   | -2,268,366,612  | -26,033,540,967   | -11,091,794,652           | -2,414,826,835  | -2,372,088,113  |
| Baseline per AE per day         | 2.71              | 2.77                                  | 2.67                                   | 2.95               | 2.34               | 2.34             | 2.01            | 2.66              | 2.81                      | 2.75            | 2.70            |
| Reformulated per AE per day     | 1.83              | 1.87                                  | 1.80                                   | 1.99               | 1.58               | 1.58             | 1.35            | 1.80              | 1.90                      | 1.86            | 1.82            |
| Change per AE per day           | -0.88             | -0.90                                 | -0.87                                  | -0.96              | -0.76              | -0.76            | -0.65           | -0.86             | -0.91                     | -0.89           | -0.88           |
| Percent change per AE per day   | -32.47%           | -32.49%                               | -32.58%                                | -32.54%            | -32.48%            | -32.48%          | -32.34%         | -32.33%           | -32.38%                   | -32.36%         | -32.59%         |
| Sodium (mg)                     |                   |                                       |                                        |                    |                    |                  |                 |                   |                           |                 |                 |
| Baseline (2014 average product) | 2,148,808,846,388 | 831,719,354,299                       | 1,317,089,492,088                      | 1,505,259,885,993  | 190,391,601,397    | 336,859,947,687  | 116,297,411,310 | 1,334,719,619,588 | 568,667,779,638           | 123,806,314,282 | 121,615,132,881 |
| Reformulated healthier product  | 1,200,947,179,714 | 464,839,399,065                       | 736,107,780,650                        | 841,274,279,869    | 106,407,909,258    | 188,267,562,661  | 64,997,427,927  | 745,961,077,714   | 317,822,577,517           | 69,194,076,624  | 67,969,447,859  |
| Total change                    | -947,861,666,674  | -366,879,955,235                      | -580,981,711,439                       | -663,985,606,124   | -83,983,692,139    | -148,592,385,026 | -51,299,983,384 | -588,758,541,874  | -250,845,202,121          | -54,612,237,658 | -53,645,685,022 |
| Baseline per AE per day         | 45.09             | 46.18                                 | 44.42                                  | 49.11              | 39.02              | 38.93            | 33.44           | 44.34             | 46.80                     | 45.87           | 44.92           |
| Reformulated per AE per day     | 25.20             | 25.81                                 | 24.83                                  | 27.45              | 21.81              | 21.76            | 18.69           | 24.78             | 26.16                     | 25.64           | 25.11           |
| Change per AE per day           | -19.89            | -20.37                                | -19.60                                 | -21.66             | -17.21             | -17.17           | -14.75          | -19.56            | -20.64                    | -20.23          | -19.81          |
| Percent change per AE per day   | -44.11%           | -44.11%                               | -44.12%                                | -44.11%            | -44.11%            | -44.10%          | -44.11%         | -44.11%           | -44.10%                   | -44.10%         | -44.10%         |
| Dietary Fiber (g)               |                   |                                       |                                        |                    |                    |                  |                 |                   |                           |                 |                 |
| Baseline (2014 average product) | 32,240,192,744    | 12,478,910,042                        | 19,761,282,702                         | 22,584,544,426     | 2,856,588,168      | 5,054,162,756    | 1,744,897,394   | 20,025,800,744    | 8,532,149,732             | 1,857,559,104   | 1,824,683,164   |
| Reformulated healthier product  | 56,420,337,302    | 21,838,092,574                        | 34,582,244,729                         | 39,522,952,746     | 4,999,029,294      | 8,844,784,823    | 3,053,570,440   | 35,045,151,302    | 14,931,262,031            | 3,250,728,432   | 3,193,195,537   |
| Total change                    | 24,180,144,558    | 9,359,182,532                         | 14,820,962,027                         | 16,938,408,320     | 2,142,441,126      | 3,790,622,067    | 1,308,673,046   | 15,019,350,558    | 6,399,112,299             | 1,393,169,328   | 1,368,512,373   |
| Baseline per AE per day         | 0.68              | 0.69                                  | 0.67                                   | 0.74               | 0.59               | 0.58             | 0.50            | 0.67              | 0.70                      | 0.69            | 0.67            |
| Reformulated per AE per day     | 1.18              | 1.21                                  | 1.17                                   | 1.29               | 1.02               | 1.02             | 0.88            | 1.16              | 1.23                      | 1.20            | 1.18            |
| Change per AE per day           | 0.51              | 0.52                                  | 0.50                                   | 0.55               | 0.44               | 0.44             | 0.38            | 0.50              | 0.53                      | 0.52            | 0.51            |
| Percent change per AE per day   | 75.00%            | 75.36%                                | 74.63%                                 | 74.32%             | 74.58%             | 75.86%           | 76.00%          | 74.63%            | 75.71%                    | 75.36%          | 76.12%          |

Potential Improvements from Reformulation of RTE Cereal by Demographic Group for Consumer Network Households with Children (Weighted), 2014

|                                 | All Households     | Low Income (<185%<br>of Poverty Line) | High Income (>185%<br>of Poverty Line) | Non-Hispanic White | Non-Hispanic Black | Hispanic         | Asian and Other | Urban             | Part Urban<br>/Part Rural | Rural           | Unspecified     |
|---------------------------------|--------------------|---------------------------------------|----------------------------------------|--------------------|--------------------|------------------|-----------------|-------------------|---------------------------|-----------------|-----------------|
| <b>3-Star Targets</b>           |                    |                                       |                                        |                    |                    |                  |                 |                   |                           |                 |                 |
| <b>Calories</b>                 |                    |                                       |                                        |                    |                    |                  |                 |                   |                           |                 |                 |
| Baseline (2014 average product) | 1,855,423,092,417  | 718,161,272,917                       | 1,137,261,819,500                      | 1,299,740,531,716  | 164,396,649,068    | 290,867,066,608  | 100,418,845,025 | 1,152,484,832,817 | 491,025,217,077           | 106,902,526,435 | 105,010,516,088 |
| Reformulated healthier product  | 1,716,790,263,618  | 664,501,959,737                       | 1,052,288,303,882                      | 1,202,626,990,685  | 152,113,319,946    | 269,134,166,757  | 92,915,786,231  | 1,066,373,889,618 | 454,336,973,229           | 98,915,022,288  | 97,164,378,483  |
| Total change                    | -138,632,828,799   | -53,659,313,181                       | -84,973,515,619                        | -97,113,541,032    | -12,283,329,122    | -21,732,899,851  | -7,503,058,794  | -86,110,943,199   | -36,688,243,848           | -7,987,504,147  | -7,846,137,605  |
| Baseline per AE per day         | 38.93              | 39.87                                 | 38.36                                  | 42.40              | 33.69              | 33.62            | 28.87           | 38.29             | 40.41                     | 39.61           | 38.79           |
| Reformulated per AE per day     | 36.02              | 36.89                                 | 35.49                                  | 39.24              | 31.18              | 31.11            | 26.72           | 35.42             | 37.39                     | 36.65           | 35.89           |
| Change per AE per day           | -2.91              | -2.98                                 | -2.87                                  | -3.17              | -2.52              | -2.51            | -2.16           | -2.86             | -3.02                     | -2.96           | -2.90           |
| Percent change per AE per day   | -7.47%             | -7.47%                                | -7.48%                                 | -7.48%             | -7.48%             | -7.47%           | -7.48%          | -7.47%            | -7.47%                    | -7.47%          | -7.48%          |
| <b>Saturated Fat (g)</b>        |                    |                                       |                                        |                    |                    |                  |                 |                   |                           |                 |                 |
| Baseline (2014 average product) | 3,224,019,274      | 1,247,891,004                         | 1,976,128,270                          | 2,258,454,443      | 285,658,817        | 505,416,276      | 174,489,739     | 2,002,580,074     | 853,214,973               | 185,755,910     | 182,468,316     |
| Reformulated healthier product  | 1,612,009,637      | 623,945,502                           | 988,064,135                            | 1,129,227,221      | 142,829,408        | 252,708,138      | 87,244,870      | 1,001,290,037     | 426,607,487               | 92,877,955      | 91,234,158      |
| Total change                    | -1,612,009,637     | -623,945,502                          | -988,064,135                           | -1,129,227,221     | -142,829,408       | -252,708,138     | -87,244,870     | -1,001,290,037    | -426,607,487              | -92,877,955     | -91,234,158     |
| Baseline per AE per day         | 0.07               | 0.07                                  | 0.07                                   | 0.07               | 0.06               | 0.06             | 0.05            | 0.07              | 0.07                      | 0.07            | 0.07            |
| Reformulated per AE per day     | 0.03               | 0.03                                  | 0.03                                   | 0.04               | 0.03               | 0.03             | 0.03            | 0.03              | 0.04                      | 0.03            | 0.03            |
| Change per AE per day           | -0.03              | -0.03                                 | -0.03                                  | -0.04              | -0.03              | -0.03            | -0.03           | -0.03             | -0.04                     | -0.03           | -0.03           |
| Percent change per AE per day   | -42.86%            | -42.86%                               | -42.86%                                | -57.14%            | -50.00%            | -50.00%          | -60.00%         | -42.86%           | -57.14%                   | -42.86%         | -42.86%         |
| <b>Sugars (g)</b>               |                    |                                       |                                        |                    |                    |                  |                 |                   |                           |                 |                 |
| Baseline (2014 average product) | 128,960,770,976    | 49,915,640,168                        | 79,045,130,808                         | 90,338,177,704     | 11,426,352,672     | 20,216,651,024   | 6,979,589,576   | 80,103,202,976    | 34,128,598,928            | 7,430,236,416   | 7,298,732,656   |
| Reformulated healthier product  | 17,732,106,009     | 6,863,400,523                         | 10,868,705,486                         | 12,421,499,434     | 1,571,123,492      | 2,779,789,516    | 959,693,567     | 11,014,190,409    | 4,692,682,353             | 1,021,657,507   | 1,003,575,740   |
| Total change                    | -111,228,664,967   | -43,052,239,645                       | -68,176,425,322                        | -77,916,678,270    | -9,855,229,180     | -17,436,861,508  | -6,019,896,009  | -69,089,012,567   | -29,435,916,575           | -6,408,578,909  | -6,295,156,916  |
| Baseline per AE per day         | 2.71               | 2.77                                  | 2.67                                   | 2.95               | 2.34               | 2.34             | 2.01            | 2.66              | 2.81                      | 2.75            | 2.70            |
| Reformulated per AE per day     | 0.37               | 0.38                                  | 0.37                                   | 0.41               | 0.32               | 0.32             | 0.28            | 0.37              | 0.39                      | 0.38            | 0.37            |
| Change per AE per day           | -2.33              | -2.39                                 | -2.30                                  | -2.54              | -2.02              | -2.02            | -1.73           | -2.30             | -2.42                     | -2.37           | -2.33           |
| Percent change per AE per day   | -85.98%            | -86.28%                               | -86.14%                                | -86.10%            | -86.32%            | -86.32%          | -86.07%         | -86.47%           | -86.12%                   | -86.18%         | -86.30%         |
| <b>Sodium (mg)</b>              |                    |                                       |                                        |                    |                    |                  |                 |                   |                           |                 |                 |
| Baseline (2014 average product) | 2,148,808,846,388  | 831,719,354,299                       | 1,317,089,492,088                      | 1,505,259,885,993  | 190,391,601,397    | 336,859,947,687  | 116,297,411,310 | 1,334,719,619,588 | 568,667,779,638           | 123,806,314,282 | 121,615,132,881 |
| Reformulated healthier product  | 876,933,242,637    | 339,426,353,142                       | 537,506,889,494                        | 614,299,608,387    | 77,699,198,170     | 137,473,226,963  | 47,461,209,117  | 544,701,780,237   | 232,074,472,710           | 50,525,607,629  | 49,631,382,061  |
| Total change                    | -1,271,875,603,751 | -492,293,001,157                      | -779,582,602,594                       | -890,960,277,606   | -112,692,403,228   | -199,386,720,724 | -68,836,202,193 | -790,017,839,351  | -336,593,306,927          | -73,280,706,653 | -71,983,750,820 |
| Baseline per AE per day         | 45.09              | 46.18                                 | 44.42                                  | 49.11              | 39.02              | 38.93            | 33.44           | 44.34             | 46.80                     | 45.87           | 44.92           |
| Reformulated per AE per day     | 18.40              | 18.85                                 | 18.13                                  | 20.04              | 15.92              | 15.89            | 13.65           | 18.09             | 19.10                     | 18.72           | 18.33           |
| Change per AE per day           | -26.69             | -27.33                                | -26.29                                 | -29.07             | -23.10             | -23.04           | -19.79          | -26.24            | -27.70                    | -27.15          | -26.59          |
| Percent change per AE per day   | -59.19%            | -59.18%                               | -59.19%                                | -59.19%            | -59.20%            | -59.18%          | -59.18%         | -59.18%           | -59.19%                   | -59.19%         | -59.19%         |
| <b>Dietary Fiber (g)</b>        |                    |                                       |                                        |                    |                    |                  |                 |                   |                           |                 |                 |
| Baseline (2014 average product) | 32,240,192,744     | 12,478,910,042                        | 19,761,282,702                         | 22,584,544,426     | 2,856,588,168      | 5,054,162,756    | 1,744,897,394   | 20,025,800,744    | 8,532,149,732             | 1,857,559,104   | 1,824,683,164   |
| Reformulated healthier product  | 41,912,250,567     | 16,222,583,055                        | 25,689,667,513                         | 29,359,907,754     | 3,713,564,618      | 6,570,411,583    | 2,268,366,612   | 26,033,540,967    | 11,091,794,652            | 2,414,826,835   | 2,372,088,113   |
| Total change                    | 9,672,057,823      | 3,743,673,013                         | 5,928,384,811                          | 6,775,363,328      | 856,976,450        | 1,516,248,827    | 523,469,218     | 6,007,740,223     | 2,559,644,920             | 557,267,731     | 547,404,949     |
| Baseline per AE per day         | 0.68               | 0.69                                  | 0.67                                   | 0.74               | 0.59               | 0.58             | 0.50            | 0.67              | 0.70                      | 0.69            | 0.67            |
| Reformulated per AE per day     | 0.88               | 0.90                                  | 0.87                                   | 0.96               | 0.76               | 0.76             | 0.65            | 0.86              | 0.91                      | 0.89            | 0.88            |
| Change per AE per day           | 0.20               | 0.21                                  | 0.20                                   | 0.22               | 0.18               | 0.18             | 0.15            | 0.20              | 0.21                      | 0.21            | 0.20            |
| Percent change per AE per day   | 29.41%             | 30.43%                                | 29.85%                                 | 29.73%             | 30.51%             | 31.03%           | 30.00%          | 29.85%            | 30.00%                    | 30.43%          | 29.85%          |

Potential Improvements from Reformulation of **Tortilla Chips and Other Chips** by Demographic Group for Consumer Network Households with Children (Weighted), 2014

|                                 | All Households    | Low Income (<185%<br>of Poverty Line) | High Income (>185%<br>of Poverty Line) | Non-Hispanic White | Non-Hispanic Black | Hispanic        | Asian and Other | Urban            | Part Urban<br>/Part Rural | Rural           | Unspecified     |
|---------------------------------|-------------------|---------------------------------------|----------------------------------------|--------------------|--------------------|-----------------|-----------------|------------------|---------------------------|-----------------|-----------------|
| <b>1-Star Targets</b>           |                   |                                       |                                        |                    |                    |                 |                 |                  |                           |                 |                 |
| <b>Calories</b>                 |                   |                                       |                                        |                    |                    |                 |                 |                  |                           |                 |                 |
| Baseline (2014 average product) | 914,274,386,771   | 327,559,538,649                       | 586,714,848,122                        | 647,568,705,017    | 72,003,751,975     | 144,833,192,990 | 49,868,736,789  | 548,295,067,838  | 256,941,811,249           | 55,967,116,729  | 53,070,390,955  |
| Reformulated healthier product  | 883,884,785,514   | 316,671,774,635                       | 567,213,010,879                        | 626,044,144,100    | 69,610,416,514     | 140,019,076,957 | 48,211,147,943  | 530,070,267,139  | 248,401,312,573           | 54,106,823,598  | 51,306,382,204  |
| Total change                    | -30,389,601,258   | -10,887,764,015                       | -19,501,837,243                        | -21,524,560,916    | -2,393,335,462     | -4,814,116,033  | -1,657,588,847  | -18,224,800,699  | -8,540,498,677            | -1,860,293,130  | -1,764,008,752  |
| Baseline per AE per day         | 19.18             | 18.19                                 | 19.79                                  | 21.13              | 14.76              | 16.74           | 14.34           | 18.21            | 21.15                     | 20.74           | 19.60           |
| Reformulated per AE per day     | 18.55             | 17.58                                 | 19.13                                  | 20.43              | 14.27              | 16.18           | 13.86           | 17.61            | 20.44                     | 20.05           | 18.95           |
| Change per AE per day           | -0.64             | -0.60                                 | -0.66                                  | -0.70              | -0.49              | -0.56           | -0.48           | -0.61            | -0.70                     | -0.69           | -0.65           |
| Percent change per AE per day   | -3.34%            | -3.30%                                | -3.34%                                 | -3.31%             | -3.32%             | -3.35%          | -3.35%          | -3.35%           | -3.31%                    | -3.33%          | -3.32%          |
| <b>Saturated Fat (g)</b>        |                   |                                       |                                        |                    |                    |                 |                 |                  |                           |                 |                 |
| Baseline (2014 average product) | 9,698,808,912     | 3,474,818,303                         | 6,223,990,610                          | 6,869,540,718      | 763,830,467        | 1,536,420,011   | 529,017,717     | 5,816,425,755    | 2,725,691,067             | 593,710,574     | 562,981,517     |
| Reformulated healthier product  | 5,819,285,347     | 2,084,890,982                         | 3,734,394,366                          | 4,121,724,431      | 458,298,280        | 921,852,006     | 317,410,630     | 3,489,855,453    | 1,635,414,640             | 356,226,344     | 337,788,910     |
| Total change                    | -3,879,523,565    | -1,389,927,321                        | -2,489,596,244                         | -2,747,816,287     | -305,532,187       | -614,568,004    | -211,607,087    | -2,326,570,302   | -1,090,276,427            | -237,484,229    | -225,192,607    |
| Baseline per AE per day         | 0.20              | 0.19                                  | 0.21                                   | 0.22               | 0.16               | 0.18            | 0.15            | 0.19             | 0.22                      | 0.22            | 0.21            |
| Reformulated per AE per day     | 0.12              | 0.12                                  | 0.13                                   | 0.13               | 0.09               | 0.11            | 0.09            | 0.12             | 0.13                      | 0.13            | 0.12            |
| Change per AE per day           | -0.08             | -0.08                                 | -0.08                                  | -0.09              | -0.06              | -0.07           | -0.06           | -0.08            | -0.09                     | -0.09           | -0.08           |
| Percent change per AE per day   | -40.00%           | -42.11%                               | -38.10%                                | -40.91%            | -37.50%            | -38.89%         | -40.00%         | -42.11%          | -40.91%                   | -40.91%         | -38.10%         |
| <b>Sugars (g)</b>               |                   |                                       |                                        |                    |                    |                 |                 |                  |                           |                 |                 |
| Baseline (2014 average product) | 5,172,698,086     | 1,853,236,428                         | 3,319,461,658                          | 3,663,755,050      | 407,376,249        | 819,424,006     | 282,142,782     | 3,102,093,736    | 1,453,701,902             | 316,645,639     | 300,256,809     |
| Reformulated healthier product  | 7,759,047,130     | 2,779,854,642                         | 4,979,192,488                          | 5,495,632,574      | 611,064,373        | 1,229,136,008   | 423,214,174     | 4,653,140,604    | 2,180,552,854             | 474,968,459     | 450,385,213     |
| Total change                    | 2,586,349,043     | 926,618,214                           | 1,659,730,829                          | 1,831,877,525      | 203,688,124        | 409,712,003     | 141,071,391     | 1,551,046,868    | 726,850,951               | 158,322,820     | 150,128,404     |
| Baseline per AE per day         | 0.11              | 0.10                                  | 0.11                                   | 0.12               | 0.08               | 0.09            | 0.08            | 0.10             | 0.12                      | 0.12            | 0.11            |
| Reformulated per AE per day     | 0.16              | 0.15                                  | 0.17                                   | 0.18               | 0.13               | 0.14            | 0.12            | 0.15             | 0.18                      | 0.18            | 0.17            |
| Change per AE per day           | 0.05              | 0.05                                  | 0.06                                   | 0.06               | 0.04               | 0.05            | 0.04            | 0.05             | 0.06                      | 0.06            | 0.06            |
| Percent change per AE per day   | 45.45%            | 50.00%                                | 54.55%                                 | 50.00%             | 50.00%             | 55.56%          | 50.00%          | 50.00%           | 50.00%                    | 50.00%          | 54.55%          |
| <b>Sodium (mg)</b>              |                   |                                       |                                        |                    |                    |                 |                 |                  |                           |                 |                 |
| Baseline (2014 average product) | 1,375,937,690,982 | 492,960,889,848                       | 882,976,801,134                        | 974,558,843,194    | 108,362,082,181    | 217,966,785,490 | 75,049,980,118  | 825,156,933,776  | 386,684,706,038           | 84,227,740,027  | 79,868,311,141  |
| Reformulated healthier product  | 860,607,644,125   | 308,332,210,709                       | 552,275,433,416                        | 609,557,246,377    | 67,777,223,394     | 136,331,668,932 | 46,941,505,422  | 516,110,845,327  | 241,859,654,012           | 52,681,918,222  | 49,955,226,564  |
| Total change                    | -515,330,046,858  | -184,628,679,140                      | -330,701,367,718                       | -365,001,596,816   | -40,584,858,787    | -81,635,116,558 | -28,108,474,697 | -309,046,088,449 | -144,825,052,027          | -31,545,821,805 | -29,913,084,577 |
| Baseline per AE per day         | 28.87             | 27.37                                 | 29.78                                  | 31.80              | 22.21              | 25.19           | 21.58           | 27.41            | 31.82                     | 31.21           | 29.50           |
| Reformulated per AE per day     | 18.06             | 17.12                                 | 18.63                                  | 19.89              | 13.89              | 15.76           | 13.50           | 17.15            | 19.90                     | 19.52           | 18.45           |
| Change per AE per day           | -10.81            | -10.25                                | -11.15                                 | -11.91             | -8.32              | -9.44           | -8.08           | -10.27           | -11.92                    | -11.69          | -11.05          |
| Percent change per AE per day   | -37.44%           | -37.45%                               | -37.44%                                | -37.45%            | -37.46%            | -37.48%         | -37.44%         | -37.47%          | -37.46%                   | -37.46%         | -37.46%         |
| <b>Dietary Fiber (g)</b>        |                   |                                       |                                        |                    |                    |                 |                 |                  |                           |                 |                 |
| Baseline (2014 average product) | 8,405,634,390     | 3,011,509,196                         | 5,394,125,195                          | 5,953,601,956      | 661,986,404        | 1,331,564,009   | 458,482,021     | 5,040,902,321    | 2,362,265,591             | 514,549,164     | 487,917,314     |
| Reformulated healthier product  | 15,518,094,259    | 5,559,709,284                         | 9,958,384,975                          | 10,991,265,149     | 1,222,128,746      | 2,458,272,017   | 846,428,347     | 9,306,281,208    | 4,361,105,707             | 949,936,918     | 900,770,426     |
| Total change                    | 7,112,459,869     | 2,548,200,089                         | 4,564,259,780                          | 5,037,663,193      | 560,142,342        | 1,126,708,008   | 387,946,326     | 4,265,378,887    | 1,998,840,116             | 435,387,754     | 412,853,112     |
| Baseline per AE per day         | 0.18              | 0.17                                  | 0.18                                   | 0.19               | 0.14               | 0.15            | 0.13            | 0.17             | 0.19                      | 0.19            | 0.18            |
| Reformulated per AE per day     | 0.33              | 0.31                                  | 0.34                                   | 0.36               | 0.25               | 0.28            | 0.24            | 0.31             | 0.36                      | 0.35            | 0.33            |
| Change per AE per day           | 0.15              | 0.14                                  | 0.15                                   | 0.16               | 0.11               | 0.13            | 0.11            | 0.14             | 0.16                      | 0.16            | 0.15            |
| Percent change per AE per day   | 83.33%            | 82.35%                                | 83.33%                                 | 84.21%             | 78.57%             | 86.67%          | 84.62%          | 82.35%           | 84.21%                    | 84.21%          | 83.33%          |

Potential Improvements from Reformulation of **Tortilla Chips and Other Chips** by Demographic Group for Consumer Network Households with Children (Weighted), 2014

|                                 | All Households    | Low Income (<185%<br>of Poverty Line) | High Income (>185%<br>of Poverty Line) | Non-Hispanic White | Non-Hispanic Black | Hispanic        | Asian and Other | Urban            | Part Urban<br>/Part Rural | Rural           | Unspecified     |
|---------------------------------|-------------------|---------------------------------------|----------------------------------------|--------------------|--------------------|-----------------|-----------------|------------------|---------------------------|-----------------|-----------------|
| <b>2-Star Targets</b>           |                   |                                       |                                        |                    |                    |                 |                 |                  |                           |                 |                 |
| <b>Calories</b>                 |                   |                                       |                                        |                    |                    |                 |                 |                  |                           |                 |                 |
| Baseline (2014 average product) | 914,274,386,771   | 327,559,538,649                       | 586,714,848,122                        | 647,568,705,017    | 72,003,751,975     | 144,833,192,990 | 49,868,736,789  | 548,295,067,838  | 256,941,811,249           | 55,967,116,729  | 53,070,390,955  |
| Reformulated healthier product  | 845,089,549,866   | 302,772,501,425                       | 542,317,048,441                        | 598,565,981,228    | 66,555,094,648     | 133,873,396,915 | 46,095,077,075  | 506,804,564,119  | 237,498,548,305           | 51,731,981,304  | 49,054,456,138  |
| Total change                    | -69,184,836,906   | -24,787,037,225                       | -44,397,799,681                        | -49,002,723,788    | -5,448,657,328     | -10,959,796,075 | -3,773,659,715  | -41,490,503,719  | -19,443,262,945           | -4,235,135,424  | -4,015,934,818  |
| Baseline per AE per day         | 19.18             | 18.19                                 | 19.79                                  | 21.13              | 14.76              | 16.74           | 14.34           | 18.21            | 21.15                     | 20.74           | 19.60           |
| Reformulated per AE per day     | 17.73             | 16.81                                 | 18.29                                  | 19.53              | 13.64              | 15.47           | 13.25           | 16.84            | 19.55                     | 19.17           | 18.12           |
| Change per AE per day           | -1.45             | -1.38                                 | -1.50                                  | -1.60              | -1.12              | -1.27           | -1.09           | -1.38            | -1.60                     | -1.57           | -1.48           |
| Percent change per AE per day   | -7.56%            | -7.59%                                | -7.58%                                 | -7.57%             | -7.59%             | -7.59%          | -7.60%          | -7.58%           | -7.57%                    | -7.57%          | -7.55%          |
| <b>Saturated Fat (g)</b>        |                   |                                       |                                        |                    |                    |                 |                 |                  |                           |                 |                 |
| Baseline (2014 average product) | 9,698,808,912     | 3,474,818,303                         | 6,223,990,610                          | 6,869,540,718      | 763,830,467        | 1,536,420,011   | 529,017,717     | 5,816,425,755    | 2,725,691,067             | 593,710,574     | 562,981,517     |
| Reformulated healthier product  | 3,879,523,565     | 1,389,927,321                         | 2,489,596,244                          | 2,747,816,287      | 305,532,187        | 614,568,004     | 211,607,087     | 2,326,570,302    | 1,090,276,427             | 237,484,229     | 225,192,607     |
| Total change                    | -5,819,285,347    | -2,084,890,982                        | -3,734,394,366                         | -4,121,724,431     | -458,298,280       | -921,852,006    | -317,410,630    | -3,489,855,453   | -1,635,414,640            | -356,226,344    | -337,788,910    |
| Baseline per AE per day         | 0.20              | 0.19                                  | 0.21                                   | 0.22               | 0.16               | 0.18            | 0.15            | 0.19             | 0.22                      | 0.22            | 0.21            |
| Reformulated per AE per day     | 0.08              | 0.08                                  | 0.08                                   | 0.09               | 0.06               | 0.07            | 0.06            | 0.08             | 0.09                      | 0.09            | 0.08            |
| Change per AE per day           | -0.12             | -0.12                                 | -0.13                                  | -0.13              | -0.09              | -0.11           | -0.09           | -0.12            | -0.13                     | -0.13           | -0.12           |
| Percent change per AE per day   | -60.00%           | -63.16%                               | -61.90%                                | -59.09%            | -56.25%            | -61.11%         | -60.00%         | -63.16%          | -59.09%                   | -59.09%         | -57.14%         |
| <b>Sugars (g)</b>               |                   |                                       |                                        |                    |                    |                 |                 |                  |                           |                 |                 |
| Baseline (2014 average product) | 5,172,698,086     | 1,853,236,428                         | 3,319,461,658                          | 3,663,755,050      | 407,376,249        | 819,424,006     | 282,142,782     | 3,102,093,736    | 1,453,701,902             | 316,645,639     | 300,256,809     |
| Reformulated healthier product  | 7,759,047,130     | 2,779,854,642                         | 4,979,192,488                          | 5,495,632,574      | 611,064,373        | 1,229,136,008   | 423,214,174     | 4,653,140,604    | 2,180,552,854             | 474,968,459     | 450,385,213     |
| Total change                    | 2,586,349,043     | 926,618,214                           | 1,659,730,829                          | 1,831,877,525      | 203,688,124        | 409,712,003     | 141,071,391     | 1,551,046,868    | 726,850,951               | 158,322,820     | 150,128,404     |
| Baseline per AE per day         | 0.11              | 0.10                                  | 0.11                                   | 0.12               | 0.08               | 0.09            | 0.08            | 0.10             | 0.12                      | 0.12            | 0.11            |
| Reformulated per AE per day     | 0.16              | 0.15                                  | 0.17                                   | 0.18               | 0.13               | 0.14            | 0.12            | 0.15             | 0.18                      | 0.18            | 0.17            |
| Change per AE per day           | 0.05              | 0.05                                  | 0.06                                   | 0.06               | 0.04               | 0.05            | 0.04            | 0.05             | 0.06                      | 0.06            | 0.06            |
| Percent change per AE per day   | 45.45%            | 50.00%                                | 54.55%                                 | 50.00%             | 50.00%             | 55.56%          | 50.00%          | 50.00%           | 50.00%                    | 50.00%          | 54.55%          |
| <b>Sodium (mg)</b>              |                   |                                       |                                        |                    |                    |                 |                 |                  |                           |                 |                 |
| Baseline (2014 average product) | 1,375,937,690,982 | 492,960,889,848                       | 882,976,801,134                        | 974,558,843,194    | 108,362,082,181    | 217,966,785,490 | 75,049,980,118  | 825,156,933,776  | 386,684,706,038           | 84,227,740,027  | 79,868,311,141  |
| Reformulated healthier product  | 833,450,979,171   | 298,602,719,462                       | 534,848,259,710                        | 590,322,532,367    | 65,638,498,088     | 132,029,692,902 | 45,460,255,814  | 499,824,853,213  | 234,227,719,024           | 51,019,528,616  | 48,378,878,318  |
| Total change                    | -542,486,711,811  | -194,358,170,387                      | -348,128,541,425                       | -384,236,310,827   | -42,723,584,093    | -85,937,092,587 | -29,589,724,304 | -325,332,080,563 | -152,456,987,014          | -33,208,211,411 | -31,489,432,823 |
| Baseline per AE per day         | 28.87             | 27.37                                 | 29.78                                  | 31.80              | 22.21              | 25.19           | 21.58           | 27.41            | 31.82                     | 31.21           | 29.50           |
| Reformulated per AE per day     | 17.49             | 16.58                                 | 18.04                                  | 19.26              | 13.45              | 15.26           | 13.07           | 16.60            | 19.28                     | 18.90           | 17.87           |
| Change per AE per day           | -11.38            | -10.79                                | -11.74                                 | -12.54             | -8.76              | -9.93           | -8.51           | -10.81           | -12.55                    | -12.30          | -11.63          |
| Percent change per AE per day   | -39.42%           | -39.42%                               | -39.42%                                | -39.43%            | -39.44%            | -39.42%         | -39.43%         | -39.44%          | -39.44%                   | -39.41%         | -39.42%         |
| <b>Dietary Fiber (g)</b>        |                   |                                       |                                        |                    |                    |                 |                 |                  |                           |                 |                 |
| Baseline (2014 average product) | 8,405,634,390     | 3,011,509,196                         | 5,394,125,195                          | 5,953,601,956      | 661,986,404        | 1,331,564,009   | 458,482,021     | 5,040,902,321    | 2,362,265,591             | 514,549,164     | 487,917,314     |
| Reformulated healthier product  | 19,397,617,824    | 6,949,636,605                         | 12,447,981,219                         | 13,739,081,436     | 1,527,660,933      | 3,072,840,021   | 1,058,035,434   | 11,632,851,510   | 5,451,382,134             | 1,187,421,147   | 1,125,963,033   |
| Total change                    | 10,991,983,434    | 3,938,127,410                         | 7,053,856,024                          | 7,785,479,480      | 865,674,529        | 1,741,276,012   | 599,553,413     | 6,591,949,189    | 3,089,116,543             | 672,871,983     | 638,045,719     |
| Baseline per AE per day         | 0.18              | 0.17                                  | 0.18                                   | 0.19               | 0.14               | 0.15            | 0.13            | 0.17             | 0.19                      | 0.19            | 0.18            |
| Reformulated per AE per day     | 0.41              | 0.39                                  | 0.42                                   | 0.45               | 0.31               | 0.36            | 0.30            | 0.39             | 0.45                      | 0.44            | 0.42            |
| Change per AE per day           | 0.23              | 0.22                                  | 0.24                                   | 0.25               | 0.18               | 0.20            | 0.17            | 0.22             | 0.25                      | 0.25            | 0.24            |
| Percent change per AE per day   | 127.78%           | 129.41%                               | 133.33%                                | 131.58%            | 128.57%            | 133.33%         | 130.77%         | 129.41%          | 131.58%                   | 131.58%         | 133.33%         |



Potential Improvements from Reformulation of **Tortilla Chips and Other Chips** by Demographic Group for Consumer Network Households with Children (Weighted), 2014

|                                 | All Households    | Low Income (<185%<br>of Poverty Line) | High Income (>185%<br>of Poverty Line) | Non-Hispanic White | Non-Hispanic Black | Hispanic         | Asian and Other | Urban            | Part Urban<br>/Part Rural | Rural           | Unspecified     |
|---------------------------------|-------------------|---------------------------------------|----------------------------------------|--------------------|--------------------|------------------|-----------------|------------------|---------------------------|-----------------|-----------------|
| <b>3-Star Targets</b>           |                   |                                       |                                        |                    |                    |                  |                 |                  |                           |                 |                 |
| <b>Calories</b>                 |                   |                                       |                                        |                    |                    |                  |                 |                  |                           |                 |                 |
| Baseline (2014 average product) | 914,274,386,771   | 327,559,538,649                       | 586,714,848,122                        | 647,568,705,017    | 72,003,751,975     | 144,833,192,990  | 49,868,736,789  | 548,295,067,838  | 256,941,811,249           | 55,967,116,729  | 53,070,390,955  |
| Reformulated healthier product  | 492,052,905,469   | 176,289,115,214                       | 315,763,790,255                        | 348,514,699,093    | 38,751,665,667     | 77,947,708,533   | 26,838,832,176  | 295,086,666,637  | 138,283,393,466           | 30,120,916,429  | 28,561,928,937  |
| Total change                    | -422,221,481,302  | -151,270,423,436                      | -270,951,057,867                       | -299,054,005,924   | -33,252,086,308    | -66,885,484,457  | -23,029,904,613 | -253,208,401,201 | -118,658,417,783          | -25,846,200,300 | -24,508,462,018 |
| Baseline per AE per day         | 19.18             | 18.19                                 | 19.79                                  | 21.13              | 14.76              | 16.74            | 14.34           | 18.21            | 21.15                     | 20.74           | 19.60           |
| Reformulated per AE per day     | 10.32             | 9.79                                  | 10.65                                  | 11.37              | 7.94               | 9.01             | 7.72            | 9.80             | 11.38                     | 11.16           | 10.55           |
| Change per AE per day           | -8.86             | -8.40                                 | -9.14                                  | -9.76              | -6.82              | -7.73            | -6.62           | -8.41            | -9.77                     | -9.58           | -9.05           |
| Percent change per AE per day   | -46.19%           | -46.18%                               | -46.18%                                | -46.19%            | -46.21%            | -46.18%          | -46.16%         | -46.18%          | -46.19%                   | -46.19%         | -46.17%         |
| <b>Saturated Fat (g)</b>        |                   |                                       |                                        |                    |                    |                  |                 |                  |                           |                 |                 |
| Baseline (2014 average product) | 9,698,808,912     | 3,474,818,303                         | 6,223,990,610                          | 6,869,540,718      | 763,830,467        | 1,536,420,011    | 529,017,717     | 5,816,425,755    | 2,725,691,067             | 593,710,574     | 562,981,517     |
| Reformulated healthier product  | 3,232,936,304     | 1,158,272,768                         | 2,074,663,537                          | 2,289,846,906      | 254,610,156        | 512,140,004      | 176,339,239     | 1,938,808,585    | 908,563,689               | 197,903,525     | 187,660,506     |
| Total change                    | -6,465,872,608    | -2,316,545,535                        | -4,149,327,073                         | -4,579,693,812     | -509,220,311       | -1,024,280,007   | -352,678,478    | -3,877,617,170   | -1,817,127,378            | -395,807,049    | -375,321,011    |
| Baseline per AE per day         | 0.20              | 0.19                                  | 0.21                                   | 0.22               | 0.16               | 0.18             | 0.15            | 0.19             | 0.22                      | 0.22            | 0.21            |
| Reformulated per AE per day     | 0.07              | 0.06                                  | 0.07                                   | 0.07               | 0.05               | 0.06             | 0.05            | 0.06             | 0.07                      | 0.07            | 0.07            |
| Change per AE per day           | -0.14             | -0.13                                 | -0.14                                  | -0.15              | -0.10              | -0.12            | -0.10           | -0.13            | -0.15                     | -0.15           | -0.14           |
| Percent change per AE per day   | -70.00%           | -68.42%                               | -66.67%                                | -68.18%            | -62.50%            | -66.67%          | -66.67%         | -68.42%          | -68.18%                   | -68.18%         | -66.67%         |
| <b>Sugars (g)</b>               |                   |                                       |                                        |                    |                    |                  |                 |                  |                           |                 |                 |
| Baseline (2014 average product) | 5,172,698,086     | 1,853,236,428                         | 3,319,461,658                          | 3,663,755,050      | 407,376,249        | 819,424,006      | 282,142,782     | 3,102,093,736    | 1,453,701,902             | 316,645,639     | 300,256,809     |
| Reformulated healthier product  | 13,578,332,477    | 4,864,745,624                         | 8,713,586,853                          | 9,617,357,005      | 1,069,362,653      | 2,150,988,015    | 740,624,804     | 8,142,996,057    | 3,815,967,494             | 831,194,803     | 788,174,123     |
| Total change                    | 8,405,634,390     | 3,011,509,196                         | 5,394,125,195                          | 5,953,601,956      | 661,986,404        | 1,331,564,009    | 458,482,021     | 5,040,902,321    | 2,362,265,591             | 514,549,164     | 487,917,314     |
| Baseline per AE per day         | 0.11              | 0.10                                  | 0.11                                   | 0.12               | 0.08               | 0.09             | 0.08            | 0.10             | 0.12                      | 0.12            | 0.11            |
| Reformulated per AE per day     | 0.28              | 0.27                                  | 0.29                                   | 0.31               | 0.22               | 0.25             | 0.21            | 0.27             | 0.31                      | 0.31            | 0.29            |
| Change per AE per day           | 0.18              | 0.17                                  | 0.18                                   | 0.19               | 0.14               | 0.15             | 0.13            | 0.17             | 0.19                      | 0.19            | 0.18            |
| Percent change per AE per day   | 163.64%           | 170.00%                               | 163.64%                                | 158.33%            | 175.00%            | 166.67%          | 162.50%         | 170.00%          | 158.33%                   | 158.33%         | 163.64%         |
| <b>Sodium (mg)</b>              |                   |                                       |                                        |                    |                    |                  |                 |                  |                           |                 |                 |
| Baseline (2014 average product) | 1,375,937,690,982 | 492,960,889,848                       | 882,976,801,134                        | 974,558,843,194    | 108,362,082,181    | 217,966,785,490  | 75,049,980,118  | 825,156,933,776  | 386,684,706,038           | 84,227,740,027  | 79,868,311,141  |
| Reformulated healthier product  | 512,743,697,814   | 183,702,060,926                       | 329,041,636,889                        | 363,169,719,292    | 40,381,170,662     | 81,225,404,555   | 27,967,403,305  | 307,495,041,581  | 144,098,201,075           | 31,387,498,986  | 29,762,956,172  |
| Total change                    | -863,193,993,168  | -309,258,828,923                      | -553,935,164,246                       | -611,389,123,902   | -67,980,911,519    | -136,741,380,935 | -47,082,576,813 | -517,661,892,195 | -242,586,504,963          | -52,840,241,042 | -50,105,354,969 |
| Baseline per AE per day         | 28.87             | 27.37                                 | 29.78                                  | 31.80              | 22.21              | 25.19            | 21.58           | 27.41            | 31.82                     | 31.21           | 29.50           |
| Reformulated per AE per day     | 10.76             | 10.20                                 | 11.10                                  | 11.85              | 8.28               | 9.39             | 8.04            | 10.21            | 11.86                     | 11.63           | 10.99           |
| Change per AE per day           | -18.11            | -17.17                                | -18.68                                 | -19.95             | -13.93             | -15.80           | -13.54          | -17.20           | -19.96                    | -19.58          | -18.51          |
| Percent change per AE per day   | -62.73%           | -62.73%                               | -62.73%                                | -62.74%            | -62.72%            | -62.72%          | -62.74%         | -62.75%          | -62.73%                   | -62.74%         | -62.75%         |
| <b>Dietary Fiber (g)</b>        |                   |                                       |                                        |                    |                    |                  |                 |                  |                           |                 |                 |
| Baseline (2014 average product) | 8,405,634,390     | 3,011,509,196                         | 5,394,125,195                          | 5,953,601,956      | 661,986,404        | 1,331,564,009    | 458,482,021     | 5,040,902,321    | 2,362,265,591             | 514,549,164     | 487,917,314     |
| Reformulated healthier product  | 24,570,315,910    | 8,802,873,033                         | 15,767,442,877                         | 17,402,836,486     | 1,935,037,182      | 3,892,264,027    | 1,340,178,216   | 14,734,945,246   | 6,905,084,036             | 1,504,066,786   | 1,426,219,842   |
| Total change                    | 16,164,681,520    | 5,791,363,838                         | 10,373,317,683                         | 11,449,234,530     | 1,273,050,778      | 2,560,700,018    | 881,696,195     | 9,694,042,925    | 4,542,818,445             | 989,517,623     | 938,302,528     |
| Baseline per AE per day         | 0.18              | 0.17                                  | 0.18                                   | 0.19               | 0.14               | 0.15             | 0.13            | 0.17             | 0.19                      | 0.19            | 0.18            |
| Reformulated per AE per day     | 0.52              | 0.49                                  | 0.53                                   | 0.57               | 0.40               | 0.45             | 0.39            | 0.49             | 0.57                      | 0.56            | 0.53            |
| Change per AE per day           | 0.34              | 0.32                                  | 0.35                                   | 0.37               | 0.26               | 0.30             | 0.25            | 0.32             | 0.37                      | 0.37            | 0.35            |
| Percent change per AE per day   | 188.89%           | 188.24%                               | 194.44%                                | 194.74%            | 185.71%            | 200.00%          | 192.31%         | 188.24%          | 194.74%                   | 194.74%         | 194.44%         |

**Potential Improvements from Reformulation of Yeast Breads by Demographic Group for Consumer Network Households with Children (Weighted), 2014**

|                                 | All Households    | Low Income (<18%<br>of Poverty Line) | High Income (>18%<br>of Poverty Line) | Non-Hispanic White | Non-Hispanic Black | Hispanic        | Asian and Other | Urban             | Part Urban<br>/Part Rural | Rural           | Unspecified     |
|---------------------------------|-------------------|--------------------------------------|---------------------------------------|--------------------|--------------------|-----------------|-----------------|-------------------|---------------------------|-----------------|-----------------|
| 1-Star Targets                  |                   |                                      |                                       |                    |                    |                 |                 |                   |                           |                 |                 |
| Calories                        |                   |                                      |                                       |                    |                    |                 |                 |                   |                           |                 |                 |
| Baseline (2014 average product) | 1,344,402,120,562 | 537,237,149,602                      | 807,164,970,961                       | 920,527,550,151    | 124,047,574,598    | 214,285,061,724 | 85,541,934,089  | 831,388,362,134   | 351,072,772,048           | 84,705,154,556  | 77,235,831,824  |
| Reformulated healthier product  | 1,512,336,408,914 | 604,345,447,792                      | 907,990,961,122                       | 1,035,514,083,331  | 139,542,820,286    | 241,052,208,841 | 96,227,296,456  | 935,240,186,528   | 394,926,582,773           | 95,285,991,668  | 86,883,647,945  |
| Total change                    | 167,934,288,352   | 67,108,298,190                       | 100,825,990,161                       | 114,986,533,180    | 15,495,245,688     | 26,767,147,117  | 10,685,362,367  | 103,851,824,394   | 43,853,810,725            | 10,580,837,112  | 9,647,816,122   |
| Baseline per AE per day         | 28.21             | 29.83                                | 27.22                                 | 30.03              | 25.42              | 24.77           | 24.60           | 27.62             | 28.89                     | 31.38           | 28.53           |
| Reformulated per AE per day     | 31.73             | 33.55                                | 30.62                                 | 33.78              | 28.60              | 27.86           | 27.67           | 31.07             | 32.50                     | 35.30           | 32.09           |
| Change per AE per day           | 3.52              | 3.73                                 | 3.40                                  | 3.75               | 3.18               | 3.09            | 3.07            | 3.45              | 3.61                      | 3.92            | 3.56            |
| Percent change per AE per day   | 12.48%            | 12.50%                               | 12.49%                                | 12.49%             | 12.51%             | 12.47%          | 12.48%          | 12.49%            | 12.50%                    | 12.49%          | 12.48%          |
| Saturated Fat (g)               |                   |                                      |                                       |                    |                    |                 |                 |                   |                           |                 |                 |
| Baseline (2014 average product) | 927,813,748       | 370,764,078                          | 557,049,669                           | 635,284,714        | 85,609,092         | 147,884,791     | 59,035,151      | 573,766,986       | 242,286,247               | 58,457,664      | 53,302,852      |
| Reformulated healthier product  | 927,813,748       | 370,764,078                          | 557,049,669                           | 635,284,714        | 85,609,092         | 147,884,791     | 59,035,151      | 573,766,986       | 242,286,247               | 58,457,664      | 53,302,852      |
| Total change                    | 0                 | 0                                    | 0                                     | 0                  | 0                  | 0               | 0               | 0                 | 0                         | 0               | 0               |
| Baseline per AE per day         | 0.02              | 0.02                                 | 0.02                                  | 0.02               | 0.02               | 0.02            | 0.02            | 0.02              | 0.02                      | 0.02            | 0.02            |
| Reformulated per AE per day     | 0.02              | 0.02                                 | 0.02                                  | 0.02               | 0.02               | 0.02            | 0.02            | 0.02              | 0.02                      | 0.02            | 0.02            |
| Change per AE per day           | 0.00              | 0.00                                 | 0.00                                  | 0.00               | 0.00               | 0.00            | 0.00            | 0.00              | 0.00                      | 0.00            | 0.00            |
| Percent change per AE per day   | 0.00%             | 0.00%                                | 0.00%                                 | 0.00%              | 0.00%              | 0.00%           | 0.00%           | 0.00%             | 0.00%                     | 0.00%           | 0.00%           |
| Sugars (g)                      |                   |                                      |                                       |                    |                    |                 |                 |                   |                           |                 |                 |
| Baseline (2014 average product) | 28,762,226,182    | 11,493,686,430                       | 17,268,539,751                        | 19,693,826,125     | 2,653,881,858      | 4,584,428,512   | 1,830,089,687   | 17,786,776,554    | 7,510,873,660             | 1,812,187,572   | 1,652,388,397   |
| Reformulated healthier product  | 25,978,784,938    | 10,381,394,195                       | 15,597,390,743                        | 17,787,971,984     | 2,397,054,582      | 4,140,774,140   | 1,652,984,234   | 16,065,475,597    | 6,784,014,919             | 1,636,814,581   | 1,492,479,842   |
| Total change                    | -2,783,441,243    | -1,112,292,235                       | -1,671,149,008                        | -1,905,854,141     | -256,827,277       | -443,654,372    | -177,105,454    | -1,721,300,957    | -726,858,741              | -175,372,991    | -159,908,555    |
| Baseline per AE per day         | 0.60              | 0.64                                 | 0.58                                  | 0.64               | 0.54               | 0.53            | 0.53            | 0.59              | 0.62                      | 0.67            | 0.61            |
| Reformulated per AE per day     | 0.55              | 0.58                                 | 0.53                                  | 0.58               | 0.49               | 0.48            | 0.48            | 0.53              | 0.56                      | 0.61            | 0.55            |
| Change per AE per day           | -0.06             | -0.06                                | -0.06                                 | -0.06              | -0.05              | -0.05           | -0.05           | -0.06             | -0.06                     | -0.06           | -0.06           |
| Percent change per AE per day   | -10.00%           | -9.38%                               | -10.34%                               | -9.38%             | -9.26%             | -9.43%          | -9.43%          | -10.17%           | -9.68%                    | -8.96%          | -9.84%          |
| Sodium (mg)                     |                   |                                      |                                       |                    |                    |                 |                 |                   |                           |                 |                 |
| Baseline (2014 average product) | 2,582,105,660,127 | 1,031,836,430,187                    | 1,550,269,229,940                     | 1,767,997,358,227  | 238,250,103,593    | 411,563,372,518 | 164,294,825,790 | 1,596,793,520,925 | 674,282,625,679           | 162,687,677,799 | 148,341,835,725 |
| Reformulated healthier product  | 2,546,848,737,711 | 1,017,747,395,208                    | 1,529,101,342,503                     | 1,743,856,539,107  | 234,996,958,089    | 405,943,750,472 | 162,051,490,044 | 1,574,990,375,472 | 665,075,748,290           | 160,466,286,582 | 146,316,327,368 |
| Total change                    | -35,256,922,416   | -14,089,034,979                      | -21,167,887,437                       | -24,140,819,121    | -3,253,145,504     | -5,619,622,047  | -2,243,335,746  | -21,803,145,453   | -9,206,877,390            | -2,221,391,217  | -2,025,508,357  |
| Baseline per AE per day         | 54.18             | 57.29                                | 52.29                                 | 57.68              | 48.83              | 47.57           | 47.24           | 53.05             | 55.49                     | 60.27           | 54.79           |
| Reformulated per AE per day     | 53.44             | 56.51                                | 51.57                                 | 56.89              | 48.16              | 46.92           | 46.60           | 52.32             | 54.73                     | 59.45           | 54.04           |
| Change per AE per day           | -0.74             | -0.78                                | -0.71                                 | -0.79              | -0.67              | -0.65           | -0.65           | -0.72             | -0.76                     | -0.82           | -0.75           |
| Percent change per AE per day   | -1.37%            | -1.36%                               | -1.36%                                | -1.37%             | -1.37%             | -1.37%          | -1.38%          | -1.36%            | -1.37%                    | -1.36%          | -1.37%          |
| Dietary Fiber (g)               |                   |                                      |                                       |                    |                    |                 |                 |                   |                           |                 |                 |
| Baseline (2014 average product) | 22,267,529,947    | 8,898,337,882                        | 13,369,192,066                        | 15,246,833,129     | 2,054,618,213      | 3,549,234,977   | 1,416,843,629   | 13,770,407,654    | 5,814,869,930             | 1,402,983,926   | 1,279,268,436   |
| Reformulated healthier product  | 22,267,529,947    | 8,898,337,882                        | 13,369,192,066                        | 15,246,833,129     | 2,054,618,213      | 3,549,234,977   | 1,416,843,629   | 13,770,407,654    | 5,814,869,930             | 1,402,983,926   | 1,279,268,436   |
| Total change                    | 0                 | 0                                    | 0                                     | 0                  | 0                  | 0               | 0               | 0                 | 0                         | 0               | 0               |
| Baseline per AE per day         | 0.47              | 0.49                                 | 0.45                                  | 0.50               | 0.42               | 0.41            | 0.41            | 0.46              | 0.48                      | 0.52            | 0.47            |
| Reformulated per AE per day     | 0.47              | 0.49                                 | 0.45                                  | 0.50               | 0.42               | 0.41            | 0.41            | 0.46              | 0.48                      | 0.52            | 0.47            |
| Change per AE per day           | 0.00              | 0.00                                 | 0.00                                  | 0.00               | 0.00               | 0.00            | 0.00            | 0.00              | 0.00                      | 0.00            | 0.00            |
| Percent change per AE per day   | 0.00%             | 0.00%                                | 0.00%                                 | 0.00%              | 0.00%              | 0.00%           | 0.00%           | 0.00%             | 0.00%                     | 0.00%           | 0.00%           |

Potential Improvements from Reformulation of **Yeast Breads** by Demographic Group for Consumer Network Households with Children (Weighted), 2014

|                                 | All Households    | Low Income (<185%<br>of Poverty Line) | High Income (>185%<br>of Poverty Line) | Non-Hispanic White | Non-Hispanic Black | Hispanic        | Asian and Other | Urban             | Part Urban<br>/Part Rural | Rural           | Unspecified     |
|---------------------------------|-------------------|---------------------------------------|----------------------------------------|--------------------|--------------------|-----------------|-----------------|-------------------|---------------------------|-----------------|-----------------|
| <b>2-Star Targets</b>           |                   |                                       |                                        |                    |                    |                 |                 |                   |                           |                 |                 |
| <b>Calories</b>                 |                   |                                       |                                        |                    |                    |                 |                 |                   |                           |                 |                 |
| Baseline (2014 average product) | 1,344,402,120,562 | 537,237,149,602                       | 807,164,970,961                        | 920,527,550,151    | 124,047,574,598    | 214,285,061,724 | 85,541,934,089  | 831,388,362,134   | 351,072,772,048           | 84,705,154,556  | 77,235,831,824  |
| Reformulated healthier product  | 1,142,138,723,542 | 456,410,580,510                       | 685,728,143,031                        | 782,035,482,565    | 105,384,792,498    | 182,046,177,352 | 72,672,271,127  | 706,307,159,274   | 298,254,370,180           | 71,961,383,892  | 65,615,810,197  |
| Total change                    | -202,263,397,020  | -80,826,569,091                       | -121,436,827,929                       | -138,492,067,587   | -18,662,782,100    | -32,238,884,373 | -12,869,662,962 | -125,081,202,861  | -52,818,401,868           | -12,743,770,665 | -11,620,021,627 |
| Baseline per AE per day         | 28.21             | 29.83                                 | 27.22                                  | 30.03              | 25.42              | 24.77           | 24.60           | 27.62             | 28.89                     | 31.38           | 28.53           |
| Reformulated per AE per day     | 23.96             | 25.34                                 | 23.13                                  | 25.51              | 21.60              | 21.04           | 20.90           | 23.46             | 24.55                     | 26.66           | 24.24           |
| Change per AE per day           | -4.24             | -4.49                                 | -4.10                                  | -4.52              | -3.82              | -3.73           | -3.70           | -4.16             | -4.35                     | -4.72           | -4.29           |
| Percent change per AE per day   | -15.03%           | -15.05%                               | -15.06%                                | -15.05%            | -15.03%            | -15.06%         | -15.04%         | -15.06%           | -15.06%                   | -15.04%         | -15.04%         |
| <b>Saturated Fat (g)</b>        |                   |                                       |                                        |                    |                    |                 |                 |                   |                           |                 |                 |
| Baseline (2014 average product) | 927,813,748       | 370,764,078                           | 557,049,669                            | 635,284,714        | 85,609,092         | 147,884,791     | 59,035,151      | 573,766,986       | 242,286,247               | 58,457,664      | 53,302,852      |
| Reformulated healthier product  | 927,813,748       | 370,764,078                           | 557,049,669                            | 635,284,714        | 85,609,092         | 147,884,791     | 59,035,151      | 573,766,986       | 242,286,247               | 58,457,664      | 53,302,852      |
| Total change                    | 0                 | 0                                     | 0                                      | 0                  | 0                  | 0               | 0               | 0                 | 0                         | 0               | 0               |
| Baseline per AE per day         | 0.02              | 0.02                                  | 0.02                                   | 0.02               | 0.02               | 0.02            | 0.02            | 0.02              | 0.02                      | 0.02            | 0.02            |
| Reformulated per AE per day     | 0.02              | 0.02                                  | 0.02                                   | 0.02               | 0.02               | 0.02            | 0.02            | 0.02              | 0.02                      | 0.02            | 0.02            |
| Change per AE per day           | 0.00              | 0.00                                  | 0.00                                   | 0.00               | 0.00               | 0.00            | 0.00            | 0.00              | 0.00                      | 0.00            | 0.00            |
| Percent change per AE per day   | 0.00%             | 0.00%                                 | 0.00%                                  | 0.00%              | 0.00%              | 0.00%           | 0.00%           | 0.00%             | 0.00%                     | 0.00%           | 0.00%           |
| <b>Sugars (g)</b>               |                   |                                       |                                        |                    |                    |                 |                 |                   |                           |                 |                 |
| Baseline (2014 average product) | 28,762,226,182    | 11,493,686,430                        | 17,268,539,751                         | 19,693,826,125     | 2,653,881,858      | 4,584,428,512   | 1,830,089,687   | 17,786,776,554    | 7,510,873,660             | 1,812,187,572   | 1,652,388,397   |
| Reformulated healthier product  | 19,484,088,704    | 7,786,045,646                         | 11,698,043,057                         | 13,340,978,988     | 1,797,790,936      | 3,105,580,605   | 1,239,738,175   | 12,049,106,698    | 5,088,011,189             | 1,227,610,936   | 1,119,359,882   |
| Total change                    | -9,278,137,478    | -3,707,640,784                        | -5,570,496,694                         | -6,352,847,137     | -856,090,922       | -1,478,847,907  | -590,351,512    | -5,737,669,856    | -2,422,862,471            | -584,576,636    | -533,028,515    |
| Baseline per AE per day         | 0.60              | 0.64                                  | 0.58                                   | 0.64               | 0.54               | 0.53            | 0.53            | 0.59              | 0.62                      | 0.67            | 0.61            |
| Reformulated per AE per day     | 0.41              | 0.43                                  | 0.39                                   | 0.44               | 0.37               | 0.36            | 0.36            | 0.40              | 0.42                      | 0.45            | 0.41            |
| Change per AE per day           | -0.19             | -0.21                                 | -0.19                                  | -0.21              | -0.18              | -0.17           | -0.17           | -0.19             | -0.20                     | -0.22           | -0.20           |
| Percent change per AE per day   | -31.67%           | -32.81%                               | -32.76%                                | -32.81%            | -33.33%            | -32.08%         | -32.08%         | -32.20%           | -32.26%                   | -32.84%         | -32.79%         |
| <b>Sodium (mg)</b>              |                   |                                       |                                        |                    |                    |                 |                 |                   |                           |                 |                 |
| Baseline (2014 average product) | 2,582,105,660,127 | 1,031,836,430,187                     | 1,550,269,229,940                      | 1,767,997,358,227  | 238,250,103,593    | 411,563,372,518 | 164,294,825,790 | 1,596,793,520,925 | 674,282,625,679           | 162,687,677,799 | 148,341,835,725 |
| Reformulated healthier product  | 2,076,447,167,576 | 829,770,007,459                       | 1,246,677,160,117                      | 1,421,767,189,261  | 191,593,148,344    | 330,966,161,587 | 132,120,668,386 | 1,284,090,513,773 | 542,236,621,010           | 130,828,251,137 | 119,291,781,657 |
| Total change                    | -505,658,492,551  | -202,066,422,728                      | -303,592,069,823                       | -346,230,168,967   | -46,656,955,249    | -80,597,210,932 | -32,174,157,404 | -312,703,007,152  | -132,046,004,670          | -31,859,426,662 | -29,050,054,068 |
| Baseline per AE per day         | 54.18             | 57.29                                 | 52.29                                  | 57.68              | 48.83              | 47.57           | 47.24           | 53.05             | 55.49                     | 60.27           | 54.79           |
| Reformulated per AE per day     | 43.57             | 46.07                                 | 42.05                                  | 46.39              | 39.27              | 38.25           | 37.99           | 42.66             | 44.62                     | 48.47           | 44.06           |
| Change per AE per day           | -10.61            | -11.22                                | -10.24                                 | -11.30             | -9.56              | -9.32           | -9.25           | -10.39            | -10.87                    | -11.80          | -10.73          |
| Percent change per AE per day   | -19.58%           | -19.58%                               | -19.58%                                | -19.59%            | -19.58%            | -19.59%         | -19.58%         | -19.59%           | -19.59%                   | -19.58%         | -19.58%         |
| <b>Dietary Fiber (g)</b>        |                   |                                       |                                        |                    |                    |                 |                 |                   |                           |                 |                 |
| Baseline (2014 average product) | 22,267,529,947    | 8,898,337,882                         | 13,369,192,066                         | 15,246,833,129     | 2,054,618,213      | 3,549,234,977   | 1,416,843,629   | 13,770,407,654    | 5,814,869,930             | 1,402,983,926   | 1,279,268,436   |
| Reformulated healthier product  | 42,679,432,399    | 17,055,147,606                        | 25,624,284,792                         | 29,223,096,830     | 3,938,018,241      | 6,802,700,372   | 2,715,616,955   | 26,393,281,338    | 11,145,167,367            | 2,689,052,526   | 2,451,931,169   |
| Total change                    | 20,411,902,452    | 8,156,809,725                         | 12,255,092,727                         | 13,976,263,701     | 1,883,400,028      | 3,253,465,395   | 1,298,773,326   | 12,622,873,683    | 5,330,297,436             | 1,286,068,599   | 1,172,662,733   |
| Baseline per AE per day         | 0.47              | 0.49                                  | 0.45                                   | 0.50               | 0.42               | 0.41            | 0.41            | 0.46              | 0.48                      | 0.52            | 0.47            |
| Reformulated per AE per day     | 0.90              | 0.95                                  | 0.86                                   | 0.95               | 0.81               | 0.79            | 0.78            | 0.88              | 0.92                      | 1.00            | 0.91            |
| Change per AE per day           | 0.43              | 0.45                                  | 0.41                                   | 0.46               | 0.39               | 0.38            | 0.37            | 0.42              | 0.44                      | 0.48            | 0.43            |
| Percent change per AE per day   | 91.49%            | 91.84%                                | 91.11%                                 | 92.00%             | 92.86%             | 92.68%          | 90.24%          | 91.30%            | 91.67%                    | 92.31%          | 91.49%          |

Potential Improvements from Reformulation of **Yeast Breads** by Demographic Group for Consumer Network Households with Children (Weighted), 2014

|                                 | All Households    | Low Income (<185%<br>of Poverty Line) | High Income (>185%<br>of Poverty Line) | Non-Hispanic White | Non-Hispanic Black | Hispanic         | Asian and Other | Urban             | Part Urban<br>/Part Rural | Rural           | Unspecified     |
|---------------------------------|-------------------|---------------------------------------|----------------------------------------|--------------------|--------------------|------------------|-----------------|-------------------|---------------------------|-----------------|-----------------|
| <b>3-Star Targets</b>           |                   |                                       |                                        |                    |                    |                  |                 |                   |                           |                 |                 |
| <b>Calories</b>                 |                   |                                       |                                        |                    |                    |                  |                 |                   |                           |                 |                 |
| Baseline (2014 average product) | 1,344,402,120,562 | 537,237,149,602                       | 807,164,970,961                        | 920,527,550,151    | 124,047,574,598    | 214,285,061,724  | 85,541,934,089  | 831,388,362,134   | 351,072,772,048           | 84,705,154,556  | 77,235,831,824  |
| Reformulated healthier product  | 1,195,024,107,166 | 477,544,132,979                       | 717,479,974,187                        | 818,246,711,246    | 110,264,510,754    | 190,475,610,422  | 76,037,274,746  | 739,011,877,453   | 312,064,686,265           | 75,293,470,717  | 68,654,072,732  |
| Total change                    | -149,378,013,396  | -59,693,016,622                       | -89,684,996,773                        | -102,280,838,906   | -13,783,063,844    | -23,809,451,303  | -9,504,659,343  | -92,376,484,682   | -39,008,085,783           | -9,411,683,840  | -8,581,759,091  |
| Baseline per AE per day         | 28.21             | 29.83                                 | 27.22                                  | 30.03              | 25.42              | 24.77            | 24.60           | 27.62             | 28.89                     | 31.38           | 28.53           |
| Reformulated per AE per day     | 25.07             | 26.51                                 | 24.20                                  | 26.70              | 22.60              | 22.01            | 21.86           | 24.55             | 25.68                     | 27.90           | 25.36           |
| Change per AE per day           | -3.13             | -3.31                                 | -3.02                                  | -3.34              | -2.82              | -2.75            | -2.73           | -3.07             | -3.21                     | -3.49           | -3.17           |
| Percent change per AE per day   | -11.10%           | -11.10%                               | -11.09%                                | -11.12%            | -11.09%            | -11.10%          | -11.10%         | -11.12%           | -11.11%                   | -11.12%         | -11.11%         |
| <b>Saturated Fat (g)</b>        |                   |                                       |                                        |                    |                    |                  |                 |                   |                           |                 |                 |
| Baseline (2014 average product) | 927,813,748       | 370,764,078                           | 557,049,669                            | 635,284,714        | 85,609,092         | 147,884,791      | 59,035,151      | 573,766,986       | 242,286,247               | 58,457,664      | 53,302,852      |
| Reformulated healthier product  | 927,813,748       | 370,764,078                           | 557,049,669                            | 635,284,714        | 85,609,092         | 147,884,791      | 59,035,151      | 573,766,986       | 242,286,247               | 58,457,664      | 53,302,852      |
| Total change                    | 0                 | 0                                     | 0                                      | 0                  | 0                  | 0                | 0               | 0                 | 0                         | 0               | 0               |
| Baseline per AE per day         | 0.02              | 0.02                                  | 0.02                                   | 0.02               | 0.02               | 0.02             | 0.02            | 0.02              | 0.02                      | 0.02            | 0.02            |
| Reformulated per AE per day     | 0.02              | 0.02                                  | 0.02                                   | 0.02               | 0.02               | 0.02             | 0.02            | 0.02              | 0.02                      | 0.02            | 0.02            |
| Change per AE per day           | 0.00              | 0.00                                  | 0.00                                   | 0.00               | 0.00               | 0.00             | 0.00            | 0.00              | 0.00                      | 0.00            | 0.00            |
| Percent change per AE per day   | 0.00%             | 0.00%                                 | 0.00%                                  | 0.00%              | 0.00%              | 0.00%            | 0.00%           | 0.00%             | 0.00%                     | 0.00%           | 0.00%           |
| <b>Sugars (g)</b>               |                   |                                       |                                        |                    |                    |                  |                 |                   |                           |                 |                 |
| Baseline (2014 average product) | 28,762,226,182    | 11,493,686,430                        | 17,268,539,751                         | 19,693,826,125     | 2,653,881,858      | 4,584,428,512    | 1,830,089,687   | 17,786,776,554    | 7,510,873,660             | 1,812,187,572   | 1,652,388,397   |
| Reformulated healthier product  | 17,628,461,208    | 7,044,517,490                         | 10,583,943,719                         | 12,070,409,560     | 1,626,572,752      | 2,809,811,023    | 1,121,667,873   | 10,901,572,726    | 4,603,438,695             | 1,110,695,608   | 1,012,754,179   |
| Total change                    | -11,133,764,974   | -4,449,168,941                        | -6,684,596,033                         | -7,623,416,564     | -1,027,309,106     | -1,774,617,488   | -708,421,814    | -6,885,203,827    | -2,907,434,965            | -701,491,963    | -639,634,218    |
| Baseline per AE per day         | 0.60              | 0.64                                  | 0.58                                   | 0.64               | 0.54               | 0.53             | 0.53            | 0.59              | 0.62                      | 0.67            | 0.61            |
| Reformulated per AE per day     | 0.37              | 0.39                                  | 0.36                                   | 0.39               | 0.33               | 0.32             | 0.32            | 0.36              | 0.38                      | 0.41            | 0.37            |
| Change per AE per day           | -0.23             | -0.25                                 | -0.23                                  | -0.25              | -0.21              | -0.21            | -0.20           | -0.23             | -0.24                     | -0.26           | -0.24           |
| Percent change per AE per day   | -38.33%           | -39.06%                               | -39.66%                                | -39.06%            | -38.89%            | -39.62%          | -37.74%         | -38.98%           | -38.71%                   | -38.81%         | -39.34%         |
| <b>Sodium (mg)</b>              |                   |                                       |                                        |                    |                    |                  |                 |                   |                           |                 |                 |
| Baseline (2014 average product) | 2,582,105,660,127 | 1,031,836,430,187                     | 1,550,269,229,940                      | 1,767,997,358,227  | 238,250,103,593    | 411,563,372,518  | 164,294,825,790 | 1,596,793,520,925 | 674,282,625,679           | 162,687,677,799 | 148,341,835,725 |
| Reformulated healthier product  | 1,873,255,956,808 | 748,572,674,290                       | 1,124,683,282,519                      | 1,282,639,836,960  | 172,844,757,152    | 298,579,392,423  | 119,191,970,273 | 1,158,435,543,926 | 489,175,932,895           | 118,026,022,808 | 107,618,457,179 |
| Total change                    | -708,849,703,319  | -283,263,755,898                      | -425,585,947,422                       | -485,357,521,267   | -65,405,346,441    | -112,983,980,095 | -45,102,855,517 | -438,357,976,998  | -185,106,692,784          | -44,661,654,990 | -40,723,378,546 |
| Baseline per AE per day         | 54.18             | 57.29                                 | 52.29                                  | 57.68              | 48.83              | 47.57            | 47.24           | 53.05             | 55.49                     | 60.27           | 54.79           |
| Reformulated per AE per day     | 39.30             | 41.56                                 | 37.93                                  | 41.85              | 35.42              | 34.51            | 34.27           | 38.48             | 40.26                     | 43.73           | 39.75           |
| Change per AE per day           | -14.87            | -15.73                                | -14.35                                 | -15.84             | -13.40             | -13.06           | -12.97          | -14.56            | -15.23                    | -16.55          | -15.04          |
| Percent change per AE per day   | -27.45%           | -27.46%                               | -27.44%                                | -27.46%            | -27.44%            | -27.45%          | -27.46%         | -27.45%           | -27.45%                   | -27.46%         | -27.45%         |
| <b>Dietary Fiber (g)</b>        |                   |                                       |                                        |                    |                    |                  |                 |                   |                           |                 |                 |
| Baseline (2014 average product) | 22,267,529,947    | 8,898,337,882                         | 13,369,192,066                         | 15,246,833,129     | 2,054,618,213      | 3,549,234,977    | 1,416,843,629   | 13,770,407,654    | 5,814,869,930             | 1,402,983,926   | 1,279,268,436   |
| Reformulated healthier product  | 52,885,383,625    | 21,133,552,469                        | 31,751,831,156                         | 36,211,228,681     | 4,879,718,255      | 8,429,433,070    | 3,365,003,618   | 32,704,718,179    | 13,810,316,085            | 3,332,086,825   | 3,038,262,536   |
| Total change                    | 30,617,853,677    | 12,235,214,587                        | 18,382,639,090                         | 20,964,395,552     | 2,825,100,043      | 4,880,198,093    | 1,948,159,990   | 18,934,310,525    | 7,995,446,154             | 1,929,102,899   | 1,758,994,100   |
| Baseline per AE per day         | 0.47              | 0.49                                  | 0.45                                   | 0.50               | 0.42               | 0.41             | 0.41            | 0.46              | 0.48                      | 0.52            | 0.47            |
| Reformulated per AE per day     | 1.11              | 1.17                                  | 1.07                                   | 1.18               | 1.00               | 0.97             | 0.97            | 1.09              | 1.14                      | 1.23            | 1.12            |
| Change per AE per day           | 0.64              | 0.68                                  | 0.62                                   | 0.68               | 0.58               | 0.56             | 0.56            | 0.63              | 0.66                      | 0.71            | 0.65            |
| Percent change per AE per day   | 136.17%           | 138.78%                               | 137.78%                                | 136.00%            | 138.10%            | 136.59%          | 136.59%         | 136.96%           | 137.50%                   | 136.54%         | 138.30%         |

Potential Improvements from Reformulation of **Yogurt** by Demographic Group for Consumer Network Households with Children (Weighted), 2014

|                                 | All Households  | Low Income (<185%<br>of Poverty Line) | High Income (>185%<br>of Poverty Line) | Non-Hispanic White | Non-Hispanic Black | Hispanic       | Asian and Other | Urban           | Part Urban<br>/Part Rural | Rural          | Unspecified    |
|---------------------------------|-----------------|---------------------------------------|----------------------------------------|--------------------|--------------------|----------------|-----------------|-----------------|---------------------------|----------------|----------------|
| <b>1-Star Targets</b>           |                 |                                       |                                        |                    |                    |                |                 |                 |                           |                |                |
| <b>Calories</b>                 |                 |                                       |                                        |                    |                    |                |                 |                 |                           |                |                |
| Baseline (2014 average product) | 377,672,953,165 | 112,938,676,390                       | 264,734,276,776                        | 271,829,070,328    | 24,871,540,282     | 56,602,609,696 | 24,369,732,998  | 243,569,734,246 | 97,084,376,789            | 18,828,519,804 | 18,190,322,327 |
| Reformulated healthier product  | 339,661,297,203 | 101,571,735,560                       | 238,089,561,644                        | 244,470,285,392    | 22,368,293,956     | 50,905,725,902 | 21,916,992,078  | 219,055,167,176 | 87,313,123,913            | 16,933,485,460 | 16,359,520,655 |
| Total change                    | -38,011,655,962 | -11,366,940,830                       | -26,644,715,132                        | -27,358,784,936    | -2,503,246,326     | -5,696,883,794 | -2,452,740,920  | -24,514,567,070 | -9,771,252,876            | -1,895,034,344 | -1,830,801,672 |
| Baseline per AE per day         | 7.92            | 6.27                                  | 8.93                                   | 8.87               | 5.10               | 6.54           | 7.01            | 8.09            | 7.99                      | 6.98           | 6.72           |
| Reformulated per AE per day     | 7.13            | 5.64                                  | 8.03                                   | 7.98               | 4.58               | 5.88           | 6.30            | 7.28            | 7.19                      | 6.27           | 6.04           |
| Change per AE per day           | -0.80           | -0.63                                 | -0.90                                  | -0.89              | -0.51              | -0.66          | -0.71           | -0.81           | -0.80                     | -0.70          | -0.68          |
| Percent change per AE per day   | -10.10%         | -10.05%                               | -10.08%                                | -10.03%            | -10.00%            | -10.09%        | -10.13%         | -10.01%         | -10.01%                   | -10.03%        | -10.12%        |
| <b>Saturated Fat (g)</b>        |                 |                                       |                                        |                    |                    |                |                 |                 |                           |                |                |
| Baseline (2014 average product) | 2,715,118,283   | 811,924,345                           | 1,903,193,938                          | 1,954,198,924      | 178,803,309        | 406,920,271    | 175,195,780     | 1,751,040,505   | 697,946,634               | 135,359,596    | 130,771,548    |
| Reformulated healthier product  | 3,801,165,596   | 1,136,694,083                         | 2,664,471,513                          | 2,735,878,494      | 250,324,633        | 569,688,379    | 245,274,092     | 2,451,456,707   | 977,125,288               | 189,503,434    | 183,080,167    |
| Total change                    | 1,086,047,313   | 324,769,738                           | 761,277,575                            | 781,679,570        | 71,521,324         | 162,768,108    | 70,078,312      | 700,416,202     | 279,178,654               | 54,143,838     | 52,308,619     |
| Baseline per AE per day         | 0.06            | 0.05                                  | 0.06                                   | 0.06               | 0.04               | 0.05           | 0.05            | 0.06            | 0.06                      | 0.05           | 0.05           |
| Reformulated per AE per day     | 0.08            | 0.06                                  | 0.09                                   | 0.09               | 0.05               | 0.07           | 0.07            | 0.08            | 0.08                      | 0.07           | 0.07           |
| Change per AE per day           | 0.02            | 0.02                                  | 0.03                                   | 0.03               | 0.01               | 0.02           | 0.02            | 0.02            | 0.02                      | 0.02           | 0.02           |
| Percent change per AE per day   | 33.33%          | 40.00%                                | 50.00%                                 | 50.00%             | 25.00%             | 40.00%         | 40.00%          | 33.33%          | 33.33%                    | 40.00%         | 40.00%         |
| <b>Sugars (g)</b>               |                 |                                       |                                        |                    |                    |                |                 |                 |                           |                |                |
| Baseline (2014 average product) | 50,501,200,064  | 15,101,792,817                        | 35,399,407,247                         | 36,348,099,986     | 3,325,741,547      | 7,568,717,041  | 3,258,641,508   | 32,569,353,393  | 12,981,807,392            | 2,517,688,486  | 2,432,350,793  |
| Reformulated healthier product  | 34,482,002,194  | 10,311,439,182                        | 24,170,563,013                         | 24,818,326,335     | 2,270,802,024      | 5,167,887,442  | 2,224,986,406   | 22,238,214,414  | 8,863,922,252             | 1,719,066,869  | 1,660,798,660  |
| Total change                    | -16,019,197,870 | -4,790,353,636                        | -11,228,844,234                        | -11,529,773,652    | -1,054,939,523     | -2,400,829,599 | -1,033,655,102  | -10,331,138,980 | -4,117,885,141            | -798,621,616   | -771,552,133   |
| Baseline per AE per day         | 1.06            | 0.84                                  | 1.19                                   | 1.19               | 0.68               | 0.87           | 0.94            | 1.08            | 1.07                      | 0.93           | 0.90           |
| Reformulated per AE per day     | 0.72            | 0.57                                  | 0.82                                   | 0.81               | 0.47               | 0.60           | 0.64            | 0.74            | 0.73                      | 0.64           | 0.61           |
| Change per AE per day           | -0.34           | -0.27                                 | -0.38                                  | -0.38              | -0.22              | -0.28          | -0.30           | -0.34           | -0.34                     | -0.30          | -0.28          |
| Percent change per AE per day   | -32.08%         | -32.14%                               | -31.93%                                | -31.93%            | -32.35%            | -32.18%        | -31.91%         | -31.48%         | -31.78%                   | -32.26%        | -31.11%        |
| <b>Sodium (mg)</b>              |                 |                                       |                                        |                    |                    |                |                 |                 |                           |                |                |
| Baseline (2014 average product) | 249,519,370,208 | 74,615,847,306                        | 174,903,522,902                        | 179,590,881,116    | 16,432,024,097     | 37,395,972,905 | 16,100,492,182  | 160,920,622,410 | 64,141,295,665            | 12,439,546,872 | 12,017,905,261 |
| Reformulated healthier product  | 231,056,565,883 | 69,094,761,760                        | 161,961,804,124                        | 166,302,328,432    | 15,216,161,596     | 34,628,915,062 | 14,909,160,878  | 149,013,546,976 | 59,395,258,553            | 11,519,101,620 | 11,128,658,735 |
| Total change                    | -18,462,804,324 | -5,521,085,546                        | -12,941,718,778                        | -13,288,552,683    | -1,215,862,501     | -2,767,057,843 | -1,191,331,304  | -11,907,075,434 | -4,746,037,111            | -920,445,253   | -889,246,526   |
| Baseline per AE per day         | 5.24            | 4.14                                  | 5.90                                   | 5.86               | 3.37               | 4.32           | 4.63            | 5.35            | 5.28                      | 4.61           | 4.44           |
| Reformulated per AE per day     | 4.85            | 3.84                                  | 5.46                                   | 5.43               | 3.12               | 4.00           | 4.29            | 4.95            | 4.89                      | 4.27           | 4.11           |
| Change per AE per day           | -0.39           | -0.31                                 | -0.44                                  | -0.43              | -0.25              | -0.32          | -0.34           | -0.40           | -0.39                     | -0.34          | -0.33          |
| Percent change per AE per day   | -7.44%          | -7.49%                                | -7.46%                                 | -7.34%             | -7.42%             | -7.41%         | -7.34%          | -7.48%          | -7.39%                    | -7.38%         | -7.43%         |
| <b>Dietary Fiber (g)</b>        |                 |                                       |                                        |                    |                    |                |                 |                 |                           |                |                |
| Baseline (2014 average product) | 1,086,047,313   | 324,769,738                           | 761,277,575                            | 781,679,570        | 71,521,324         | 162,768,108    | 70,078,312      | 700,416,202     | 279,178,654               | 54,143,838     | 52,308,619     |
| Reformulated healthier product  | 5,973,260,223   | 1,786,233,559                         | 4,187,026,664                          | 4,299,237,633      | 393,367,280        | 895,224,596    | 385,430,716     | 3,852,289,111   | 1,535,482,595             | 297,791,111    | 287,697,406    |
| Total change                    | 4,887,212,909   | 1,461,463,821                         | 3,425,749,088                          | 3,517,558,063      | 321,845,956        | 732,456,488    | 315,352,404     | 3,151,872,909   | 1,256,303,941             | 243,647,273    | 235,388,786    |
| Baseline per AE per day         | 0.02            | 0.02                                  | 0.03                                   | 0.03               | 0.01               | 0.02           | 0.02            | 0.02            | 0.02                      | 0.02           | 0.02           |
| Reformulated per AE per day     | 0.13            | 0.10                                  | 0.14                                   | 0.14               | 0.08               | 0.10           | 0.11            | 0.13            | 0.13                      | 0.11           | 0.11           |
| Change per AE per day           | 0.10            | 0.08                                  | 0.12                                   | 0.11               | 0.07               | 0.08           | 0.09            | 0.10            | 0.10                      | 0.09           | 0.09           |
| Percent change per AE per day   | 500.00%         | 400.00%                               | 400.00%                                | 366.67%            | 700.00%            | 400.00%        | 450.00%         | 500.00%         | 500.00%                   | 450.00%        | 450.00%        |

**Potential Improvements from Reformulation of **Yogurt** by Demographic Group for Consumer Network Households with Children (Weighted), 2014**

|                                 | All Households   | Low Income (<185%<br>of Poverty Line) | High Income (>185%<br>of Poverty Line) | Non-Hispanic White | Non-Hispanic Black | Hispanic        | Asian and Other | Urban           | Part Urban<br>/Part Rural | Rural          | Unspecified    |
|---------------------------------|------------------|---------------------------------------|----------------------------------------|--------------------|--------------------|-----------------|-----------------|-----------------|---------------------------|----------------|----------------|
| 2-Star Targets                  |                  |                                       |                                        |                    |                    |                 |                 |                 |                           |                |                |
| Calories                        |                  |                                       |                                        |                    |                    |                 |                 |                 |                           |                |                |
| Baseline (2014 average product) | 377,672,953,165  | 112,938,676,390                       | 264,734,276,776                        | 271,829,070,328    | 24,871,540,282     | 56,602,609,696  | 24,369,732,998  | 243,569,734,246 | 97,084,376,789            | 18,828,519,804 | 18,190,322,327 |
| Reformulated healthier product  | 256,307,165,915  | 76,645,658,168                        | 179,661,507,747                        | 184,476,378,426    | 16,879,032,370     | 38,413,273,582  | 16,538,481,632  | 165,298,223,672 | 65,886,162,250            | 12,777,945,862 | 12,344,834,131 |
| Total change                    | -121,365,787,250 | -36,293,018,222                       | -85,072,769,029                        | -87,352,691,903    | -7,992,507,912     | -18,189,336,114 | -7,831,251,366  | -78,271,510,574 | -31,198,214,540           | -6,050,573,941 | -5,845,488,196 |
| Baseline per AE per day         | 7.92             | 6.27                                  | 8.93                                   | 8.87               | 5.10               | 6.54            | 7.01            | 8.09            | 7.99                      | 6.98           | 6.72           |
| Reformulated per AE per day     | 5.38             | 4.26                                  | 6.06                                   | 6.02               | 3.46               | 4.44            | 4.76            | 5.49            | 5.42                      | 4.73           | 4.56           |
| Change per AE per day           | -2.55            | -2.02                                 | -2.87                                  | -2.85              | -1.64              | -2.10           | -2.25           | -2.60           | -2.57                     | -2.24          | -2.16          |
| Percent change per AE per day   | -32.20%          | -32.22%                               | -32.14%                                | -32.13%            | -32.16%            | -32.11%         | -32.10%         | -32.14%         | -32.17%                   | -32.09%        | -32.14%        |
| Saturated Fat (g)               |                  |                                       |                                        |                    |                    |                 |                 |                 |                           |                |                |
| Baseline (2014 average product) | 2,715,118,283    | 811,924,345                           | 1,903,193,938                          | 1,954,198,924      | 178,803,309        | 406,920,271     | 175,195,780     | 1,751,040,505   | 697,946,634               | 135,359,596    | 130,771,548    |
| Reformulated healthier product  | 1,629,070,970    | 487,154,607                           | 1,141,916,363                          | 1,172,519,354      | 107,281,985        | 244,152,163     | 105,117,468     | 1,050,624,303   | 418,767,980               | 81,215,758     | 78,462,929     |
| Total change                    | -1,086,047,313   | -324,769,738                          | -761,277,575                           | -781,679,570       | -71,521,324        | -162,768,108    | -70,078,312     | -700,416,202    | -279,178,654              | -54,143,838    | -52,308,619    |
| Baseline per AE per day         | 0.06             | 0.05                                  | 0.06                                   | 0.06               | 0.04               | 0.05            | 0.05            | 0.06            | 0.06                      | 0.05           | 0.05           |
| Reformulated per AE per day     | 0.03             | 0.03                                  | 0.04                                   | 0.04               | 0.02               | 0.03            | 0.03            | 0.03            | 0.03                      | 0.03           | 0.03           |
| Change per AE per day           | -0.02            | -0.02                                 | -0.03                                  | -0.03              | -0.01              | -0.02           | -0.02           | -0.02           | -0.02                     | -0.02          | -0.02          |
| Percent change per AE per day   | -33.33%          | -40.00%                               | -50.00%                                | -50.00%            | -25.00%            | -40.00%         | -40.00%         | -33.33%         | -33.33%                   | -40.00%        | -40.00%        |
| Sugars (g)                      |                  |                                       |                                        |                    |                    |                 |                 |                 |                           |                |                |
| Baseline (2014 average product) | 50,501,200,064   | 15,101,792,817                        | 35,399,407,247                         | 36,348,099,986     | 3,325,741,547      | 7,568,717,041   | 3,258,641,508   | 32,569,353,393  | 12,981,807,392            | 2,517,688,486  | 2,432,350,793  |
| Reformulated healthier product  | 22,535,481,749   | 6,738,972,064                         | 15,796,509,685                         | 16,219,851,069     | 1,484,067,465      | 3,377,438,249   | 1,454,124,974   | 14,533,636,192  | 5,792,957,062             | 1,123,484,647  | 1,085,403,848  |
| Total change                    | -27,965,718,315  | -8,362,820,754                        | -19,602,897,561                        | -20,128,248,917    | -1,841,674,083     | -4,191,278,791  | -1,804,516,534  | -18,035,717,202 | -7,188,850,330            | -1,394,203,839 | -1,346,946,944 |
| Baseline per AE per day         | 1.06             | 0.84                                  | 1.19                                   | 1.19               | 0.68               | 0.87            | 0.94            | 1.08            | 1.07                      | 0.93           | 0.90           |
| Reformulated per AE per day     | 0.47             | 0.37                                  | 0.53                                   | 0.53               | 0.30               | 0.39            | 0.42            | 0.48            | 0.48                      | 0.42           | 0.40           |
| Change per AE per day           | -0.59            | -0.46                                 | -0.66                                  | -0.66              | -0.38              | -0.48           | -0.52           | -0.60           | -0.59                     | -0.52          | -0.50          |
| Percent change per AE per day   | -55.66%          | -54.76%                               | -55.46%                                | -55.46%            | -55.88%            | -55.17%         | -55.32%         | -55.56%         | -55.14%                   | -55.91%        | -55.56%        |
| Sodium (mg)                     |                  |                                       |                                        |                    |                    |                 |                 |                 |                           |                |                |
| Baseline (2014 average product) | 249,519,370,208  | 74,615,847,306                        | 174,903,522,902                        | 179,590,881,116    | 16,432,024,097     | 37,395,972,905  | 16,100,492,182  | 160,920,622,410 | 64,141,295,665            | 12,439,546,872 | 12,017,905,261 |
| Reformulated healthier product  | 247,347,275,581  | 73,966,307,830                        | 173,380,967,752                        | 178,027,521,976    | 16,288,981,450     | 37,070,436,688  | 15,960,335,558  | 159,519,790,006 | 63,582,938,357            | 12,331,259,196 | 11,913,288,023 |
| Total change                    | -2,172,094,626   | -649,539,476                          | -1,522,555,150                         | -1,563,359,139     | -143,042,647       | -325,536,217    | -140,156,624    | -1,400,832,404  | -558,357,307              | -108,287,677   | -104,617,238   |
| Baseline per AE per day         | 5.24             | 4.14                                  | 5.90                                   | 5.86               | 3.37               | 4.32            | 4.63            | 5.35            | 5.28                      | 4.61           | 4.44           |
| Reformulated per AE per day     | 5.19             | 4.11                                  | 5.85                                   | 5.81               | 3.34               | 4.28            | 4.59            | 5.30            | 5.23                      | 4.57           | 4.40           |
| Change per AE per day           | -0.05            | -0.04                                 | -0.05                                  | -0.05              | -0.03              | -0.04           | -0.04           | -0.05           | -0.05                     | -0.04          | -0.04          |
| Percent change per AE per day   | -0.95%           | -0.97%                                | -0.85%                                 | -0.85%             | -0.89%             | -0.93%          | -0.86%          | -0.93%          | -0.95%                    | -0.87%         | -0.90%         |
| Dietary Fiber (g)               |                  |                                       |                                        |                    |                    |                 |                 |                 |                           |                |                |
| Baseline (2014 average product) | 1,086,047,313    | 324,769,738                           | 761,277,575                            | 781,679,570        | 71,521,324         | 162,768,108     | 70,078,312      | 700,416,202     | 279,178,654               | 54,143,838     | 52,308,619     |
| Reformulated healthier product  | 2,172,094,626    | 649,539,476                           | 1,522,555,150                          | 1,563,359,139      | 143,042,647        | 325,536,217     | 140,156,624     | 1,400,832,404   | 558,357,307               | 108,287,677    | 104,617,238    |
| Total change                    | 1,086,047,313    | 324,769,738                           | 761,277,575                            | 781,679,570        | 71,521,324         | 162,768,108     | 70,078,312      | 700,416,202     | 279,178,654               | 54,143,838     | 52,308,619     |
| Baseline per AE per day         | 0.02             | 0.02                                  | 0.03                                   | 0.03               | 0.01               | 0.02            | 0.02            | 0.02            | 0.02                      | 0.02           | 0.02           |
| Reformulated per AE per day     | 0.05             | 0.04                                  | 0.05                                   | 0.05               | 0.03               | 0.04            | 0.04            | 0.05            | 0.05                      | 0.04           | 0.04           |
| Change per AE per day           | 0.02             | 0.02                                  | 0.03                                   | 0.03               | 0.01               | 0.02            | 0.02            | 0.02            | 0.02                      | 0.02           | 0.02           |
| Percent change per AE per day   | 100.00%          | 100.00%                               | 100.00%                                | 100.00%            | 100.00%            | 100.00%         | 100.00%         | 100.00%         | 100.00%                   | 100.00%        | 100.00%        |

Potential Improvements from Reformulation of **Yogurt** by Demographic Group for Consumer Network Households with Children (Weighted), 2014

|                                 | All Households  | Low Income (<185%<br>of Poverty Line) | High Income (>185%<br>of Poverty Line) | Non-Hispanic White | Non-Hispanic Black | Hispanic        | Asian and Other | Urban           | Part Urban<br>/Part Rural | Rural          | Unspecified    |
|---------------------------------|-----------------|---------------------------------------|----------------------------------------|--------------------|--------------------|-----------------|-----------------|-----------------|---------------------------|----------------|----------------|
| <b>3-Star Targets</b>           |                 |                                       |                                        |                    |                    |                 |                 |                 |                           |                |                |
| <b>Calories</b>                 |                 |                                       |                                        |                    |                    |                 |                 |                 |                           |                |                |
| Baseline (2014 average product) | 377,672,953,165 | 112,938,676,390                       | 264,734,276,776                        | 271,829,070,328    | 24,871,540,282     | 56,602,609,696  | 24,369,732,998  | 243,569,734,246 | 97,084,376,789            | 18,828,519,804 | 18,190,322,327 |
| Reformulated healthier product  | 306,536,854,151 | 91,666,258,551                        | 214,870,595,600                        | 220,629,058,520    | 20,186,893,586     | 45,941,298,596  | 19,779,603,562  | 197,692,473,015 | 78,798,174,979            | 15,282,098,388 | 14,764,107,769 |
| Total change                    | -71,136,099,015 | -21,272,417,839                       | -49,863,681,176                        | -51,200,011,809    | -4,684,646,696     | -10,661,311,100 | -4,590,129,436  | -45,877,261,231 | -18,286,201,811           | -3,546,421,415 | -3,426,214,558 |
| Baseline per AE per day         | 7.92            | 6.27                                  | 8.93                                   | 8.87               | 5.10               | 6.54            | 7.01            | 8.09            | 7.99                      | 6.98           | 6.72           |
| Reformulated per AE per day     | 6.43            | 5.09                                  | 7.25                                   | 7.20               | 4.14               | 5.31            | 5.69            | 6.57            | 6.48                      | 5.66           | 5.45           |
| Change per AE per day           | -1.49           | -1.18                                 | -1.68                                  | -1.67              | -0.96              | -1.23           | -1.32           | -1.52           | -1.50                     | -1.31          | -1.27          |
| Percent change per AE per day   | -18.81%         | -18.82%                               | -18.81%                                | -18.83%            | -18.82%            | -18.81%         | -18.83%         | -18.79%         | -18.77%                   | -18.77%        | -18.90%        |
| <b>Saturated Fat (g)</b>        |                 |                                       |                                        |                    |                    |                 |                 |                 |                           |                |                |
| Baseline (2014 average product) | 2,715,118,283   | 811,924,345                           | 1,903,193,938                          | 1,954,198,924      | 178,803,309        | 406,920,271     | 175,195,780     | 1,751,040,505   | 697,946,634               | 135,359,596    | 130,771,548    |
| Reformulated healthier product  | 0               | 0                                     | 0                                      | 0                  | 0                  | 0               | 0               | 0               | 0                         | 0              | 0              |
| Total change                    | -2,715,118,283  | -811,924,345                          | -1,903,193,938                         | -1,954,198,924     | -178,803,309       | -406,920,271    | -175,195,780    | -1,751,040,505  | -697,946,634              | -135,359,596   | -130,771,548   |
| Baseline per AE per day         | 0.06            | 0.05                                  | 0.06                                   | 0.06               | 0.04               | 0.05            | 0.05            | 0.06            | 0.06                      | 0.05           | 0.05           |
| Reformulated per AE per day     | 0.00            | 0.00                                  | 0.00                                   | 0.00               | 0.00               | 0.00            | 0.00            | 0.00            | 0.00                      | 0.00           | 0.00           |
| Change per AE per day           | -0.06           | -0.05                                 | -0.06                                  | -0.06              | -0.04              | -0.05           | -0.05           | -0.06           | -0.06                     | -0.05          | -0.05          |
| Percent change per AE per day   | -100.00%        | -100.00%                              | -100.00%                               | -100.00%           | -100.00%           | -100.00%        | -100.00%        | -100.00%        | -100.00%                  | -100.00%       | -100.00%       |
| <b>Sugars (g)</b>               |                 |                                       |                                        |                    |                    |                 |                 |                 |                           |                |                |
| Baseline (2014 average product) | 50,501,200,064  | 15,101,792,817                        | 35,399,407,247                         | 36,348,099,986     | 3,325,741,547      | 7,568,717,041   | 3,258,641,508   | 32,569,353,393  | 12,981,807,392            | 2,517,688,486  | 2,432,350,793  |
| Reformulated healthier product  | 21,449,434,436  | 6,414,202,326                         | 15,035,232,110                         | 15,438,171,500     | 1,412,546,141      | 3,214,670,141   | 1,384,046,662   | 13,833,219,990  | 5,513,778,409             | 1,069,340,808  | 1,033,095,229  |
| Total change                    | -29,051,765,628 | -8,687,590,492                        | -20,364,175,137                        | -20,909,928,487    | -1,913,195,406     | -4,354,046,900  | -1,874,594,846  | -18,736,133,404 | -7,468,028,984            | -1,448,347,677 | -1,399,255,564 |
| Baseline per AE per day         | 1.06            | 0.84                                  | 1.19                                   | 1.19               | 0.68               | 0.87            | 0.94            | 1.08            | 1.07                      | 0.93           | 0.90           |
| Reformulated per AE per day     | 0.45            | 0.36                                  | 0.51                                   | 0.50               | 0.29               | 0.37            | 0.40            | 0.46            | 0.45                      | 0.40           | 0.38           |
| Change per AE per day           | -0.61           | -0.48                                 | -0.69                                  | -0.68              | -0.39              | -0.50           | -0.54           | -0.62           | -0.61                     | -0.54          | -0.52          |
| Percent change per AE per day   | -57.55%         | -57.14%                               | -57.98%                                | -57.14%            | -57.35%            | -57.47%         | -57.45%         | -57.41%         | -57.01%                   | -58.06%        | -57.78%        |
| <b>Sodium (mg)</b>              |                 |                                       |                                        |                    |                    |                 |                 |                 |                           |                |                |
| Baseline (2014 average product) | 249,519,370,208 | 74,615,847,306                        | 174,903,522,902                        | 179,590,881,116    | 16,432,024,097     | 37,395,972,905  | 16,100,492,182  | 160,920,622,410 | 64,141,295,665            | 12,439,546,872 | 12,017,905,261 |
| Reformulated healthier product  | 235,943,778,793 | 70,556,225,581                        | 165,387,553,212                        | 169,819,886,496    | 15,538,007,552     | 35,361,371,550  | 15,224,513,282  | 152,165,419,885 | 60,651,562,495            | 11,762,748,892 | 11,364,047,521 |
| Total change                    | -13,575,591,415 | -4,059,621,725                        | -9,515,969,690                         | -9,770,994,620     | -894,016,545       | -2,034,601,355  | -875,978,900    | -8,755,202,525  | -3,489,733,170            | -676,797,980   | -653,857,740   |
| Baseline per AE per day         | 5.24            | 4.14                                  | 5.90                                   | 5.86               | 3.37               | 4.32            | 4.63            | 5.35            | 5.28                      | 4.61           | 4.44           |
| Reformulated per AE per day     | 4.95            | 3.92                                  | 5.58                                   | 5.54               | 3.18               | 4.09            | 4.38            | 5.05            | 4.99                      | 4.36           | 4.20           |
| Change per AE per day           | -0.28           | -0.23                                 | -0.32                                  | -0.32              | -0.18              | -0.24           | -0.25           | -0.29           | -0.29                     | -0.25          | -0.24          |
| Percent change per AE per day   | -5.34%          | -5.56%                                | -5.42%                                 | -5.46%             | -5.34%             | -5.56%          | -5.40%          | -5.42%          | -5.49%                    | -5.42%         | -5.41%         |
| <b>Dietary Fiber (g)</b>        |                 |                                       |                                        |                    |                    |                 |                 |                 |                           |                |                |
| Baseline (2014 average product) | 1,086,047,313   | 324,769,738                           | 761,277,575                            | 781,679,570        | 71,521,324         | 162,768,108     | 70,078,312      | 700,416,202     | 279,178,654               | 54,143,838     | 52,308,619     |
| Reformulated healthier product  | 12,218,032,274  | 3,653,659,553                         | 8,564,372,721                          | 8,793,895,158      | 804,614,891        | 1,831,141,220   | 788,381,010     | 7,879,682,273   | 3,140,759,853             | 609,118,182    | 588,471,966    |
| Total change                    | 11,131,984,960  | 3,328,889,815                         | 7,803,095,146                          | 8,012,215,588      | 733,093,567        | 1,668,373,111   | 718,302,698     | 7,179,266,071   | 2,861,581,199             | 554,974,344    | 536,163,347    |
| Baseline per AE per day         | 0.02            | 0.02                                  | 0.03                                   | 0.03               | 0.01               | 0.02            | 0.02            | 0.02            | 0.02                      | 0.02           | 0.02           |
| Reformulated per AE per day     | 0.26            | 0.20                                  | 0.29                                   | 0.29               | 0.16               | 0.21            | 0.23            | 0.26            | 0.26                      | 0.23           | 0.22           |
| Change per AE per day           | 0.23            | 0.18                                  | 0.26                                   | 0.26               | 0.15               | 0.19            | 0.21            | 0.24            | 0.24                      | 0.21           | 0.20           |
| Percent change per AE per day   | 1150.00%        | 900.00%                               | 866.67%                                | 866.67%            | 1500.00%           | 950.00%         | 1050.00%        | 1200.00%        | 1200.00%                  | 1050.00%       | 1000.00%       |
